# Supplementary material for: Characterization of RBP9 and RBP10, two developmentally regulated RNA-binding proteins in Trypanosoma brucei
Source: Open Biol. 2017 Apr 5;7(4):160159. doi: 10.1098/rsob.160159 (PMC5413900; doi:10.1098/rsob.160159)
Supplement: Table S9 [file rsob160159supp9.xlsx]

## Sheet: Table S9
Table S9.Protein enrichements of proteins present only in RBP9 or RBP10 BioID experiments and proteins biotinylated in both BioID datasets.
Proteins only biotinylated in RBP9 BioID n=158							Proteins only biotinylated in RBP10 BioID n=172							Proteins biotinylated in RBP9 and RBP10 BioID n=614
														BioID RBP9						BioID RBP10
		Fold Enrichment							Fold Enrichment							Fold Enrichment						Fold Enrichment
accession	Annotation	Expt. 1	Expt.2	Average	Log2 Average		accession	Annotation	Expt. 1	Expt.2	Average	Log2 Average		accession	Annotation	Expt. 1	Expt.2	Average	Log2 Average	accession	Annotation	Expt. 1	Expt.2	Average	Log2 Average
Tb927.11.12120	RBP9	4920.34	518.438	2719.39	11.4091		Tb927.10.9740	proteasome regulatory ATPase subunit 6,19S proteasome regulatory subunit	231.8	1161.7	696.756	9.44451		Tb927.1.2430	histone H3	6175.56	2663	4419.28	12.1096	Tb927.1.2430	histone H3	187.7	189.6	188.611	7.55927
Tb927.10.2620	hypothetical protein, conserved	466.358	353.4	409.879	8.67905		Tb927.1.4420	ABC transporter, putative	435.6	255	345.276	8.43161		Tb927.5.4170	histone H4	1123.56	710.5	917.029	9.84082	Tb927.5.4170	histone H4	277.2	277.8	277.486	8.11627
Tb927.8.900	splicing factor TSR1	23.86	580.7	302.28	8.23974		Tb927.5.520	stomatin-like protein, putative	243.7	209.5	226.622	7.82414		Tb927.11.6630	3-methylcrotonoyl-CoA carboxylase beta subunit, putative	812.6	623.8	718.2	9.48824	Tb927.11.6630	3-methylcrotonoyl-CoA carboxylase beta subunit, putative	102.9	458	280.445	8.13157
Tb927.10.8720	NOT10	370.6	61.13	215.865	7.75399		Tb927.7.990	chaperone protein DNAj, putative	115.8	186.8	151.285	7.24113		Tb927.11.16550	ZC3H46	579.375	436.7	508.038	8.98879	Tb927.11.16550	hypothetical protein, conserved	55.2	147.8	101.5	6.66534
Tb927.11.11780	acyl-CoA dehydrogenase, putative	279.475	53.0962	166.286	7.37752		Tb927.11.14090	RNA Binding Protein	141.9	126.5	134.205	7.0683		Tb927.9.10770	PABP2	721.8	286	503.9	8.97699	Tb927.9.10770	PABP2	132.6	272.9	202.78	7.66377
Tb927.5.2080	guanosine monophosphate reductase, putative	308.323	5.58721	156.955	7.29421		Tb927.10.14780	protein kinase, putative,mitogen-activated protein kinase kinase kinase, putative	66.2	164	115.1	6.84674		Tb927.10.11390	60S ribosomal protein L6	380.705	564	472.352	8.88372	Tb927.10.11390	60S ribosomal protein L6, putative	111.7	129.3	120.502	6.91292
Tb927.10.1550	proteasome regulatory non-ATP-ase subunit 5,19S proteasome regulatory subunit	244.8	35.13	139.965	7.12892		Tb927.6.4140	paraflagellar rod component, putative	24.9	189.7	107.303	6.74555		Tb927.7.7420	ATP synthase alpha chain, mitochondrial precursor,ATP synthase F1	350.76	510.681	430.721	8.75061	Tb927.7.7420	ATP synthase alpha chain, mitochondrial precursor,ATP synthase F1, alpha subunit	84.1	96.2	90.1285	6.49391
Tb927.4.4730	amino acid transporter, putative	224.6	45.13	134.865	7.07537		Tb927.2.3030	ATP-dependent Clp protease subunit, heat shock protein 78 (HSP78), putative,serine peptidase, putative	19.3	193	106.123	6.72959		Tb927.11.4300	60S ribosomal protein L18	468.622	368.8	418.711	8.70981	Tb927.11.4300	60S ribosomal protein L18, putative	72	105.4	88.6781	6.47051
Tb927.10.11300	paraflagellar rod component, putative	227.4	14.83	121.115	6.92023		Tb927.8.4890	endoplasmic reticulum oxidoreductin, putative,pol-associated gene 1	24.9	181.7	103.29	6.69056		Tb927.7.2780	hypothetical protein, conserved	336.52	419.8	378.16	8.56285	Tb927.7.2780	hypothetical protein, conserved	490.6	487.2	488.906	8.93341
Tb927.10.14140	pyruvate kinase 1	94.02	127.1	110.56	6.78869		Tb927.5.1930	hypothetical protein, conserved	68	131.8	99.865	6.64191		Tb927.11.4460	ALBA1	450	303.6	376.8	8.55766	Tb927.11.4460	ALBA1	168.1	124.8	146.48	7.19456
Tb927.10.14750	fibrillarin, putative	158.718	62.36	110.539	6.78841		Tb927.11.14090	hypothetical protein, conserved	112.2	84	98.14	6.61677		Tb927.8.1330	60S ribosomal protein L7a	413.042	280.5	346.771	8.43784	Tb927.8.1330	60S ribosomal protein L7a	113.2	130.7	121.984	6.93055
Tb927.11.4210	hypothetical protein, conserved	183.65	36.61	110.13	6.78306		Tb927.11.1740	intraflagellar transport protein IFT88	51.9	115.7	83.825	6.38931		Tb927.9.13990	DRBD2	423	210.8	316.9	8.30788	Tb927.9.13990	DRBD2	87.3	125.4	106.375	6.73302
Tb927.2.820	retrotransposon hot spot protein (RHS, pseudogene), putative,retrotransposon hot spot protein 1 (RHS1)	192.185	26.7103	109.448	6.7741		Tb927.10.15720	proteasome regulatory non-ATP-ase subunit 9,19S proteasome regulatory subunit	17.1	148.1	82.6405	6.36878		Tb927.8.4290	hypothetical protein, conserved	234.036	339	286.518	8.16248	Tb927.8.4290	hypothetical protein, conserved	278	276.8	277.4	8.11582
Tb927.4.4940	hypothetical protein, conserved	111.88	83.83	97.855	6.61257		Tb927.6.1090	proteasome regulatory ATPase subunit 3	27.2	131.9	79.565	6.31406		Tb927.7.210	proline dehydrogenase	378.796	169.094	273.945	8.09774	Tb927.7.210	proline dehydrogenase	89.8	97.9	93.8396	6.55213
Tb927.10.8270	eukaryotic translation initiation factor 3 subunit 8, putative	149.06	34.73	91.895	6.52191		Tb927.7.1790	Adenine phosphoribosyltransferase, putative	66.1	90	78.06	6.28651		Tb927.11.7350	histone H2B variant	295.2	200	247.6	7.95187	Tb927.11.7350	histone H2B variant, putative	144.6	244.6	194.6	7.60437
Tb927.9.14000	60S ribosomal protein L12, putative	97.16	83.3	90.23	6.49554		Tb927.4.4380	vacuolar-type proton translocating pyrophosphatase 1, putative	37.2	110.8	73.985	6.20916		Tb927.10.8200	hypothetical protein, conserved	274.145	206.3	240.222	7.90823	Tb927.10.8200	hypothetical protein, conserved	69.1	73.2	71.1753	6.1533
Tb927.3.1380	ATP synthase beta chain, mitochondrial precursor,ATP synthase F1, beta subunit	136.28	43.91	90.0948	6.49337		Tb927.11.10160	60S ribosomal protein L22, putative	74.5	68.1	71.2812	6.15545		Tb927.10.5150	ZC3H31	389.2	89.68	239.44	7.90352	Tb927.10.5150	ZC3H31	1182.2	796.8	989.5	9.95056
Tb927.1.3180	40S ribosomal protein S11, putative	142.64	16.47	79.555	6.31388		Tb927.4.4910	3,2-trans-enoyl-CoA isomerase, mitochondrial precursor, putative	34.5	87.5	60.97	5.93003		Tb927.10.4180	TFIIF-stimulated CTD phosphatase	334.4	113.7	224.05	7.80768	Tb927.10.4180	TFIIF-stimulated CTD phosphatase, putative	394	424	409	8.67596
Tb927.11.15230	cytosolic coat protein, putative	102.8	30.89	66.845	6.06275		Tb927.3.4000	clathrin coat assembly protein ap19, putative	48.6	59.4	54	5.75489		Tb927.2.2670	histone H4	319.855	111	215.428	7.75106	Tb927.2.2670	histone H4, putative	42	42.9	42.4614	5.40808
Tb927.10.12700	pyruvate dehydrogenase E1 alpha subunit, putative	82.06	44.99	63.525	5.98925		Tb927.4.1600	hypothetical protein, conserved	49.3	58.6	53.945	5.75342		Tb927.11.4450	ALBA2	256.6	145.6	201.1	7.65177	Tb927.11.4450	ALBA2	53.9	61.1	57.525	5.84612
Tb927.8.6580	succinate dehydrogenase flavoprotein, putative	112.94	10.53	61.735	5.94802		Tb927.11.16450	hypothetical protein, conserved	30.7	75	52.87	5.72438		Tb927.10.5360	40S ribosomal protein S10	249.591	131.316	190.453	7.57329	Tb927.10.5360	40S ribosomal protein S10, putative	70.6	157.2	113.877	6.83133
Tb11.0400	P27 protein, putative (P27)	87.58	23.41	55.495	5.79429		Tb927.10.3200	U2 splicing auxiliary factor, putative	52.5	52.3	52.3669	5.71058		Tb927.9.2020	60S ribosomal protein L38, putative	49.38	319.7	184.54	7.52779	Tb927.9.2020	60S ribosomal protein L38	1229	799.1	1014.05	9.98591
Tb927.8.2460	hypothetical protein, conserved	64.38	42.55	53.465	5.74052		Tb927.11.5450	malic enzyme, putative	11.8	82.2	46.9971	5.5545		Tb927.11.2060	60S acidic ribosomal subunit protein, putative	307.409	40.02	173.715	7.44058	Tb927.11.2060	60S acidic ribosomal subunit protein, putative	109.1	289.6	199.343	7.63911
Tb927.11.11590	eukaryotic translation initiation factor, putative	95.1027	11.1475	53.1251	5.73132		Tb927.11.14950	ZFP2	50.9	41.6	46.215	5.53029		Tb927.6.4770	mkt1	216.668	123.2	169.934	7.40883	Tb927.6.4770	mkt1	74.3	99.6	86.9505	6.44212
Tb927.6.4340	U6 snRNA-associated Sm-like protein LSm5p	52.38	52.78	52.58	5.71644		Tb927.11.260	hypothetical protein, conserved,predicted WD40 repeat protein	33.4	54.8	44.111	5.46307		Tb927.11.11230	40S ribosomal protein L14, putative	126.572	207.3	166.936	7.38315	Tb927.11.11230	40S ribosomal protein L14, putative	94.2	95.5	94.888	6.56815
Tb927.10.9080	pteridine transporter, putative	84.06	19	51.53	5.68734		Tb927.11.1180	protein kinase, putative,cdc2-related kinase, putative	38.3	48.8	43.5696	5.44525		Tb927.4.1080	V-type ATPase, A subunit, putative	294.2	37.19	165.695	7.37239	Tb927.4.1080	V-type ATPase, A subunit, putative	23.6	137.3	80.465	6.33029
Tb927.10.4640	EIF3-interacting protein, putative	89.512	11.63	50.571	5.66024		Tb927.9.1780	sec1 family transport protein, putative	35.6	51	43.305	5.43646		Tb927.11.7380	glycerol-3-phosphate dehydrogenase (FAD-dependent), mitochondrial	255	76.06	165.53	7.37095	Tb927.11.7380	glycerol-3-phosphate dehydrogenase (FAD-dependent), mitochondrial	158.4	397.6	278	8.11894
Tb927.3.1790	pyruvate dehydrogenase E1 beta subunit, putative	53.5	44.15	48.825	5.60955		Tb927.9.12110	6-phosphogluconate dehydrogenase, decarboxylating	17.8	66.2	42.0343	5.3935		Tb927.4.3550	60S ribosomal protein L13a, putative	152.19	163.2	157.695	7.30099	Tb927.4.3550	60S ribosomal protein L13a, putative	82.3	110.5	96.3633	6.59041
Tb927.10.730	ATP synthase, putative	78.6513	18.6412	48.6462	5.60426		Tb927.7.230	40S ribosomal protein S33, putative	29.5	54.3	41.8939	5.38867		Tb927.11.9710	60S ribosomal protein L10a, putative	151.4	158.6	155	7.27612	Tb927.11.9710	60S ribosomal protein L10a, putative	34.9	157.7	96.275	6.58909
Tb927.6.560	cysteine peptidase C (CPC),CPC cysteine peptidase, Clan CA, family C1, Cathepsin B-like	68.4	26.78	47.59	5.57259		Tb927.2.1180	retrotransposon hot spot (RHS) protein, putative,retrotransposon hot spot protein 3 (RHS3), putative	34.6	47.6	41.1136	5.36154		Tb927.3.4920	LETM1	240.675	60.93	150.803	7.23652	Tb927.3.4920	LETM1	73.5	81.4	77.4523	6.27524
Tb927.11.13970	Pab1p-dependent poly(A) ribonuclease subunit, putative,PAN3	64.5835	29.67	47.1267	5.55847		Tb927.9.3770	hypothetical protein, conserved	36.2	44.5	40.32	5.33342		Tb927.9.8720	fructose-1,6-bisphosphatase	220.438	55.9305	138.184	7.11045	Tb927.9.8720	fructose-1,6-bisphosphatase	35.5	323.2	179.335	7.48652
Tb927.11.8800	hypothetical protein, conserved	79.02	11.12	45.07	5.4941		Tb927.11.8380	NADPH--cytochrome p450 reductase, putative	12.6	67.8	40.1624	5.32777		Tb927.10.8980	hypothetical protein, conserved	157.7	112.9	135.3	7.08002	Tb927.10.8980	hypothetical protein, conserved	113.9	431.4	272.64	8.09085
Tb927.10.7500	fibrillarin	59.4	28.57	43.985	5.45894		Tb927.5.960	hypothetical protein, conserved	19.1	60.4	39.7757	5.31382		Tb927.11.880	cyclophilin a,cyclophilin type peptidyl-prolyl cis-trans isomerase	21.7	235	128.35	7.00394	Tb927.11.880	cyclophilin a,cyclophilin type peptidyl-prolyl cis-trans isomerase	41.8	45.8	43.785	5.45236
Tb927.11.5970	phosphoinositide-specific phospholipase C, putative	64.4	19.66	42.03	5.39335		Tb927.8.5460	flagellar calcium-binding protein,44 kDa calflagin,44 kDa calcimedin	33.2	41	37.095	5.21315		Tb927.10.12740	ZC3H35	156.255	99.6	127.928	6.99919	Tb927.10.12740	ZC3H35	215.1	148.6	181.836	7.50649
Tb927.7.5340	hypothetical protein, conserved	81.0896	1.73463	41.4121	5.37198		Tb927.11.5780	mitochondrial DNA-directed RNA polymerase	26.6	42.8	34.7105	5.1173		Tb927.9.9290	PABP1	120.103	133.7	126.901	6.98756	Tb927.9.9290	polyadenylate-binding protein 1, putative	33	35.1	34.0676	5.09033
Tb927.7.1240	hypothetical protein, conserved	65.62	15.17	40.395	5.3361		Tb927.10.2200	hypothetical protein, conserved	27.5	41.6	34.55	5.11061		Tb927.11.5520	triosephosphate isomerase	49.8399	181.8	115.82	6.85574	Tb927.11.5520	triosephosphate isomerase	38.7	38.4	38.5378	5.2682
Tb927.10.16070	eukaryotic translation initiation factor 4e, putative	41.68	38.52	40.1	5.32553		Tb927.9.13580	hypothetical protein, conserved	29.3	38.7	34	5.08746		Tb927.3.720	ZFP2	226.955	4.5899	115.773	6.85515	Tb927.3.720	ZFP2	311.6	23.5	167.556	7.3885
Tb927.10.180	ATP synthase F1 subunit gamma protein, putative	46.58	32.09	39.335	5.29774		Tb927.10.6810	guanylate kinase, putative	37.4	30.1	33.745	5.0766		Tb927.11.11520	glycosomal membrane protein, putative	222.018	7.11246	114.565	6.84002	Tb927.11.11520	glycosomal membrane protein, putative	70	110.4	90.2185	6.49535
Tb927.10.15710	mitochondrial carrier protein, putative	61.74	13.17	37.455	5.22709		Tb927.10.1390	hypoxanthine-guanine phosphoribosyltransferase, putative	24.8	42.2	33.495	5.06587		Tb927.10.11930	NAD or NADP dependent oxidoreductase	187.62	40.29	113.955	6.83232	Tb927.10.11930	NAD or NADP dependent oxidoreductase, putative,short chain dehydrogenase, putative	26.8	108.4	67.59	6.07874
Tb927.10.6220	5'-3' exoribonuclease XRND, putative,5'-3' exoribonuclease 2, putative	62.3415	11.21	36.7757	5.20068		Tb927.10.8490	glucose transporter, putative	25.3	39.2	32.27	5.01212		Tb927.9.12890	hypothetical protein, conserved	135.14	91.99	113.565	6.82737	Tb927.9.12890	hypothetical protein, conserved	242.6	263.5	253.05	7.98328
Tb927.8.2160	multidrug resistance protein A,p-glycoprotein	61.7955	7.56575	34.6806	5.11606		Tb927.9.10560	hypothetical protein, conserved	34.5	29.4	31.935	4.99707		Tb927.10.12660	PUF2	176.54	49.53	113.035	6.82063	Tb927.10.12660	PUF2	152.9	128.6	140.76	7.13709
Tb927.5.1060	mitochondrial processing peptidase, beta subunit, putative,metallo-peptidase, Clan ME, Family M16	51.38	17.18	34.28	5.0993		Tb927.8.800	hypothetical protein, conserved	24.1	38	31.0616	4.95706		Tb927.3.3580	lipophosphoglycan biosynthetic protein, putative,heat shock protein 90, putative,glucose regulated protein 94, putative	148.33	74.08	111.205	6.79708	Tb927.3.3580	lipophosphoglycan biosynthetic protein, putative,heat shock protein 90, putative,glucose regulated protein 94, putative	26.9	46.7	36.8154	5.20224
Tb927.7.6930	ATPase, putative	49.62	18.88	34.25	5.09803		Tb927.11.6230	SEC61	9.7	51.9	30.7583	4.9429		Tb927.11.11680	2-oxoglutarate dehydrogenase E2 component, putative	156.42	54.78	105.6	6.72247	Tb927.11.11680	2-oxoglutarate dehydrogenase E2 component, putative	27.5	126.2	76.855	6.26407
Tb927.7.2170	hypothetical protein, conserved	53.6078	12.5	33.0539	5.04675		Tb927.9.9550	hypothetical protein, conserved	18.5	40.6	29.5293	4.88407		Tb927.8.890	small GTP-binding protein Rab1	152.86	56.97	104.915	6.71308	Tb927.8.890	small GTP-binding protein Rab1, putative	42.7	78.2	60.42	5.91695
Tb927.2.1140	retrotransposon hot spot protein (RHS, pseudogene), putative,retrotransposon hot spot protein 3 (RHS3), interrupted	51.88	13.55	32.715	5.03188		Tb927.11.8870	mitochondrial DEAD box protein,KREH1	16.6	40.8	28.7318	4.84457		Tb927.9.11580	Gim5A protein,glycosomal membrane protein	79.8584	126.7	103.279	6.69041	Tb927.9.11580	Gim5A protein,glycosomal membrane protein	24.8	26.7	25.7619	4.68717
Tb927.10.11590	nicotinate phosphoribosyltransferase, putative	46.84	16.6	31.72	4.98732		Tb927.3.2190	RNA triphosphatase	28	28.7	28.3226	4.82388		Tb927.8.3020	hypothetical protein, conserved	158.346	38.19	98.2679	6.61865	Tb927.8.3020	hypothetical protein, conserved	16.2	33.9	25.0359	4.64593
Tb05.5K5.60	hypothetical protein, conserved,BAC from homologous region on chr5	46.126	14.87	30.498	4.93064		Tb927.8.6330	hypothetical protein, conserved	28.9	23.3	26.0979	4.70586		Tb927.11.11900	coatomer gamma subunit, putative,cytosolic coat protein, putative	147.412	47.94	97.676	6.60993	Tb927.11.11900	coatomer gamma subunit, putative,cytosolic coat protein, putative	36.1	51	43.5537	5.44472
Tb927.2.6050	beta prime COP protein	49.26	10.59	29.925	4.90328		Tb927.7.1500	nucleotide binding protein, putative	20.3	28.7	24.4987	4.61464		Tb927.11.3740	proteasome regulatory ATPase subunit 2	155.38	38.38	96.88	6.59813	Tb927.11.3740	proteasome regulatory ATPase subunit 2	33.7	109.4	71.55	6.16088
Tb927.10.11270	RNA-binding protein, putative	47.52	12.32	29.92	4.90304		Tb927.10.10610	protein tyrosine phosphatase, putative	25.3	21.5	23.3813	4.54729		Tb927.10.9910	hypothetical protein, conserved	132.12	54.2	93.16	6.54164	Tb927.10.9910	hypothetical protein, conserved	47.5	60.7	54.095	5.75742
Tb927.11.15240	small GTPase, putative,ras-related protein rab-2a, putative	38.02	21.74	29.88	4.90111		Tb927.9.4500	HSP70-like protein	38.8	4.6	21.6923	4.43911		Tb927.8.4810	prohibitin 1	165.84	17.32	91.58	6.51696	Tb927.8.4810	prohibitin 1	52.7	130.2	91.425	6.51452
Tb927.7.4950	NAD(p)-dependent steroid dehydrogenase-like protein	44.8	14.16	29.48	4.88166		Tb927.10.13310	DNA-directed RNA polymerase II, putative,RNA polymerase subunit, putative	4.9	31.3	18.0796	4.17629		Tb927.6.820	PUF4	148.84	28.27	88.555	6.4685	Tb927.6.820	pumilio RNA binding protein, putative	31.7	42.6	37.155	5.21548
Tb927.5.1700	replication Factor A 28 kDa subunit, putative	40.2735	18.53	29.4018	4.87783		Tb927.4.2380	sarcoplasmic reticulum glycoprotein, putative	14.3	21.4	17.8396	4.15702		Tb927.11.10200	hypothetical protein, conserved	98.5616	71.91	85.2358	6.41339	Tb927.11.10200	hypothetical protein, conserved	64.4	111.7	88.0784	6.46072
Tb927.11.3980	mitochondrial processing peptidase alpha subunit, putative,metallo-peptidase, Clan ME, Family M16	40.4	17.86	29.13	4.86443		Tb927.11.5810	hypothetical protein, conserved	15.8	16.1	15.9419	3.99475		Tb927.8.4330	small GTP-binding protein Rab11,Rab11A GTPase	137.82	28.73	83.275	6.37981	Tb927.8.4330	small GTP-binding protein Rab11,Rab11A GTPase	77.1	166.1	121.595	6.92594
Tb927.11.510	RNA-binding protein (UBP2)	41.1869	16.22	28.7034	4.84315		Tb927.4.110	is_pseudo=true retrotransposon hot spot protein (RHS, pseudogene), putative,retrotransposon hot spot protein 1 (RHS1), interrupted	11.8	18.3	15.0307	3.90984		Tb927.7.4180	fatty acid elongase, putative	95.3289	69.88	82.6044	6.36815	Tb927.7.4180	fatty acid elongase, putative	20.4	50	35.1562	5.13571
Tb927.5.1000	ubiquitin-conjugating enzyme e2, putative,ubiquitin carrier protein, putative,ubiquitin-protein ligase, putative	34.64	22.38	28.51	4.8334		Tb927.10.2980	proteasome regulatory non-ATPase subunit 11,19S proteasome regulatory subunit, Metallo-peptidase, Clan MP, Family M67	11.4	18.3	14.8852	3.89581		Tb927.7.320	RBP8	98.68	60.23	79.455	6.31207	Tb927.7.320	hypothetical protein, conserved	20.1	28.4	24.205	4.59723
Tb927.4.470	snoRNP protein GAR1, putative	39.8	15.62	27.71	4.79233		Tb927.11.4700	prostaglandin f synthase	12.8	14.9	13.8721	3.79411		Tb927.6.850	NOT2	108.56	48.32	78.44	6.29352	Tb927.6.850	hypothetical protein, conserved	34.5	89	61.76	5.9486
Tb927.6.1030	cysteine peptidase precursor,cysteine peptidase, Clan CA, family C1, Cathepsin L-like	34.76	19.87	27.315	4.77162		Tb927.10.2810	hypothetical protein, conserved	11.1	16.2	13.6143	3.76706		Tb927.2.4210	glycosomal phosphoenolpyruvate carboxykinase	53.4516	102.464	77.9577	6.28462	Tb927.2.4210	glycosomal phosphoenolpyruvate carboxykinase	10.5	23.1	16.8204	4.07214
Tb927.8.7730	hypothetical protein, conserved	31.78	22.7	27.24	4.76765		Tb927.8.5650	hypothetical protein, conserved	10.1	12.3	11.1689	3.48141		Tb927.7.1730	60S ribosomal protein L7, putative	58.6961	97.0256	77.8608	6.28283	Tb927.7.1730	60S ribosomal protein L7, putative	23.8	25	24.4015	4.6089
Tb927.3.5520	26S proteasome regulatory non-ATPase subunit	40.9511	13.27	27.1106	4.76078		Tb927.11.1420	hypothetical protein, conserved	4.6	17.4	10.9801	3.45682		Tb11.0845	dynein light chain LC8, putative	141.82	11.17	76.495	6.25729	Tb11.0845	dynein light chain LC8, putative	24.3	125.4	74.84	6.22574
Tb927.3.1240	protein phosphatase 2A, putative	33.7447	17.15	25.4474	4.66944		Tb927.11.6720	mRNA cap guanine-N7 methyltransferase, putative	8.6	11.2	9.86924	3.30294		Tb927.10.5620	fructose-bisphosphate aldolase, glycosomal	117.479	32.7114	75.095	6.23065	Tb927.10.5620	fructose-bisphosphate aldolase, glycosomal	38.8	150.5	94.6537	6.56459
Tb927.8.3250	dynein heavy chain, putative	39.3599	10.88	25.1199	4.65076		Tb927.10.450	hypothetical protein, conserved	8.7	8	8.36978	3.06519		Tb927.10.2900	importin beta-1 subunit, putative	133.94	10.25	72.095	6.17183	Tb927.10.2900	importin beta-1 subunit, putative	26.7	77.3	52.025	5.70113
Tb927.4.2530	hypothetical protein, conserved	23.96	23.98	23.97	4.58316		Tb927.6.4600	pre-mRNA splicing factor ATP-dependent RNA helicase, putative,ATP-dependent RNA helicase, putative	8.8	7.7	8.24146	3.0429		Tb927.6.3500	endosomal trafficking protein RME-8, putative	121.088	22.85	71.9688	6.1693	Tb927.6.3500	endosomal trafficking protein RME-8, putative	53.7	143.3	98.5015	6.62207
Tb927.7.3080	hypothetical protein, conserved	28.16	19.77	23.965	4.58286		Tb927.9.7590	60S ribosomal protein L11, putative	3.3	12.5	7.89368	2.9807		Tb927.10.1400	hypoxanthine-guanine phosphoribosyltransferase	133.307	9.66667	71.487	6.15961	Tb927.10.1400	hypoxanthine-guanine phosphoribosyltransferase	98.2	45.8	72.0066	6.17006
Tb927.6.4370	eukaryotic translation initiation factor 3 subunit 7-like protein	20.2492	24.91	22.5796	4.49695		Tb927.10.7090	alternative oxidase	2.7	12.5	7.63248	2.93215		Tb927.6.5040	ribosomal protein L15, putative	71.1917	71.05	71.1208	6.1522	Tb927.6.5040	ribosomal protein L15, putative	23.1	30.9	26.9992	4.75485
Tb927.10.8170	nuclear pore complex protein (NUP155), putative,nucleoporin, putative	37.8452	6.55348	22.1993	4.47244		Tb927.10.7440	MTR4,ATP- dependent RNA helicase, putative	4.4	8	6.23056	2.63936		Tb927.11.5290	mitochondrial carrier protein, putative	113.157	28.48	70.8186	6.14606	Tb927.11.5290	mitochondrial carrier protein, putative	16.6	24.4	20.4729	4.35565
Tb927.9.6230	arginine kinase	25.2	19.08	22.14	4.46858		Tb927.7.3880	protein kinase, putative	6.1	5.8	5.93026	2.5681		Tb927.7.3040	hypothetical protein, conserved	108.924	32.53	70.7271	6.14419	Tb927.7.3040	hypothetical protein, conserved	68.8	71.8	70.2687	6.13481
Tb927.2.1330	retrotransposon hot spot protein (RHS, pseudogene), putative,retrotransposon hot spot protein 6 (RHS6), degenerate	27.38	16.84	22.11	4.46663		Tb927.11.16830	Rab-like 5, small G protein	6.1	5.7	5.86496	2.55212		Tb927.11.15150	1-acyl-sn-glycerol-3-phosphate acyltransferase protein, putative	126.02	15.04	70.53	6.14017	Tb927.11.15150	1-acyl-sn-glycerol-3-phosphate acyltransferase protein, putative	37.4	103.2	70.32	6.13586
Tb927.6.4740	importin-alpha re-exporter protein, putative,cellular apoptosis susceptibility protein, putative	32.3963	10.1604	21.2784	4.41132		Tb927.5.1250	hypothetical protein, conserved	5.3	6.1	5.72468	2.51719		Tb927.3.3560	hypothetical protein, conserved	102.148	35.8259	68.9872	6.10826	Tb927.3.3560	hypothetical protein, conserved	27.1	64.6	45.8438	5.51865
Tb927.8.3690	isocitrate dehydrogenase [NADP], mitochondrial precursor, putative	40.7648	1.45638	21.1106	4.39989		Tb927.11.5700	hypothetical protein, conserved	5.3	5.8	5.59549	2.48426		Tb927.10.4610	dolicholphosphate-mannose synthase, putative	121.06	15.01	68.035	6.08821	Tb927.10.4610	dolicholphosphate-mannose synthase, putative	21.7	138.8	80.255	6.32652
Tb927.6.740	ATP-dependent DEAH-box RNA helicase, putative	23.4703	18.2086	20.8395	4.38125		Tb927.9.1680	Mov34/MPN/PAD-1 metallopeptidase, putative,metallo-peptidase, Clan MP, Family M67	5	4.2	4.59924	2.2014		Tb927.10.12960	ras-related protein rab-5,small GTPase, putative	105.22	26.59	65.905	6.04232	Tb927.10.12960	ras-related protein rab-5,small GTPase, putative	48	100.2	74.075	6.21091
Tb927.10.7310	terminal uridylyltransferase 3, putative	22.74	15.93	19.335	4.27314		Tb927.2.240	retrotransposon hot spot (RHS) protein, putative,retrotransposon hot spot protein 5 (RHS5), putative	3.6	5.4	4.51367	2.1743		Tb927.1.1420	hypothetical protein, conserved	71.6108	54.0724	62.8416	5.97365	Tb927.1.1420	hypothetical protein, conserved	52.9	38.5	45.7491	5.51567
Tb927.8.730	nucleolar RNA-binding protein, putative	31.0186	4.12261	17.5706	4.13509		Tb927.2.3080	fatty acid desaturase, putative,oleate desaturase, putative	2.7	5.5	4.0816	2.02913		Tb927.1.2260	calpain-like protein fragment, putative	107.82	15.82	61.82	5.95	Tb927.1.2260	calpain-like protein fragment, putative	81.7	67.3	74.49	6.21897
Tb927.6.1870	eukaryotic translation initiation factor 4e, putative	22.6086	11.18	16.8943	4.07847		Tb927.10.5840	translation elongation factor 1-beta, putative	4.4	3.4	3.85978	1.94852		Tb927.9.6870	RNA-binding protein, putative (RBSR1)	35.3	85.27	60.285	5.91373	Tb927.9.6870	RBSR1	38.2	49.1	43.68	5.4489
Tb927.11.5250	hypothetical protein, conserved	18.3719	15.1652	16.7685	4.06768		Tb927.3.740	hypothetical protein, conserved,ZFP family member, putative	4.1	3.2	3.66084	1.87217		Tb927.11.16400	kinetoplast DNA-associated protein, putative	65.8017	45.08	55.4409	5.79288	Tb927.11.16400	kinetoplast DNA-associated protein, putative	21.1	41.1	31.1131	4.95945
Tb927.2.4130	enoyl-CoA hydratase/Enoyl-CoA isomerase/3-hydroxyacyl-CoA dehydrogenase, putative	26.9249	5.90708	16.416	4.03703		Tb927.9.12570	glycerol kinase, glycosomal	2.5	4.6	3.55063	1.82807		Tb927.10.540	SUB2	107.287	3.47829	55.3826	5.79136	Tb927.10.540	SUB2	75.1	244.4	159.746	7.31964
Tb927.6.1500	alkyl-dihydroxyacetone phosphate synthase,alkyl-DHAP synthase,alkylglycerone-phosphate synthase	22.7746	9.95321	16.3639	4.03245		Tb927.10.4060	hypothetical protein, conserved	3.4	3.6	3.49769	1.8064		Tb927.10.510	hypothetical protein, conserved	95.7837	12.33	54.0568	5.75641	Tb927.10.510	hypothetical protein, conserved	55.2	130.5	92.8785	6.53727
Tb927.2.560	retrotransposon hot spot (RHS) protein, putative,retrotransposon hot spot protein 4 (RHS4), putative	20.205	12.3	16.2525	4.02259		Tb927.5.2410	kinesin, putative	3.3	3.6	3.48095	1.79948		Tb927.3.1590	hypothetical protein, conserved	68.9059	39.0269	53.9664	5.75399	Tb927.3.1590	hypothetical protein, conserved	4.1	8.1	6.09596	2.60785
Tb927.10.2020	hexokinase	23.8443	4.96686	14.4056	3.84855		Tb927.3.1800	hypothetical protein, conserved	3.2	3.8	3.46002	1.79078		Tb927.11.530	RNA-binding protein, putative (RBP3)	49.92	51.76	50.84	5.66789	Tb927.11.530	RBP3	359.8	203.6	281.69	8.13796
Tb927.10.1720	ATP-dependent DEAD/H RNA helicase, putative	22.0995	3.05051	12.575	3.65249		Tb927.6.1770	kinesin, putative	2.9	3.8	3.3293	1.73522		Tb927.7.2820	histone H2A, putative	58.5968	42.5873	50.5921	5.66084	Tb927.7.2820	histone H2A, putative	16.9	17.4	17.1215	4.09774
Tb927.2.3180	hypothetical protein, conserved	16.7627	8.13523	12.449	3.63796		Tb927.8.5580	hypothetical protein, conserved	3.6	3	3.2724	1.71035		Tb927.5.3400	calcium-translocating P-type ATPase,calcium pump	75.2108	22.0837	48.6473	5.60429	Tb927.5.3400	calcium-translocating P-type ATPase,calcium pump	28.2	48.1	38.1191	5.25244
Tb927.10.15370	DNA-directed RNA polymerase, alpha subunit, putative,RNA polymerase subunit, putative	21.3559	3.48965	12.4228	3.63492		Tb927.11.11690	vacuolar ATP synthase subunit b, putative,v- ATPase B subunit,vacuolar proton pump B subunit	2.8	3.3	3.08098	1.62339		Tb927.10.14930	hypothetical protein, conserved,zinc finger protein family member, putative	66.9639	27.2504	47.1071	5.55787	Tb927.10.14930	ZC3H39	83.9	42.7	63.2877	5.98385
Tb927.8.6110	hypothetical protein, conserved	16.811	0.683311	8.74714	3.12881		Tb927.5.2940	stress-induced protein sti1, putative	3.6	2.2	2.91005	1.54104		Tb927.3.720	zinc finger protein 2	61.48	32.39	46.935	5.55259	Tb927.3.720	ZFP2	311.6	23.5	167.556	7.3885
Tb927.9.4290	hypothetical protein, conserved	11.9621	5.01188	8.48698	3.08525		Tb927.10.12040	protein kinase, putative,mitogen-activated protein kinase 11, putative	3.5	2	2.77307	1.47148		Tb927.3.1410	cytochrome oxidase subunit VII	31.76	55.62	43.69	5.44923	Tb927.3.1410	cytochrome oxidase subunit VII	24.4	30.6	27.51	4.78188
Tb927.2.830	retrotransposon hot spot protein (RHS, pseudogene), putative,retrotransposon hot spot protein 1 (RHS1), interrupted	15.1996	1.46981	8.33472	3.05913		Tb927.9.6940	DNA topoisomerase type IB small subunit	2.8	2.7	2.74685	1.45778		Tb927.10.13730	60S ribosomal protein L7, putative	66.7603	19.2311	42.9957	5.42612	Tb927.10.13730	60S ribosomal protein L7, putative	17.2	24	20.6097	4.36525
Tb927.4.4070	mevalonate kinase, putative	4.03939	11.0692	7.55429	2.9173		Tb927.8.2640	ubiquitin-activating enzyme e1, putative	2.4	3	2.68199	1.4233		Tb927.1.2570	coatomer beta subunit	63.5975	21.1668	42.3821	5.40538	Tb927.1.2570	coatomer beta subunit	16.7	24.3	20.5136	4.35851
Tb927.11.16020	RNA-binding protein, putative	13.0661	1.57622	7.32114	2.87207		Tb927.11.2860	hypothetical protein, conserved	3.2	2.1	2.6762	1.42019		Tb927.11.5170	ubiquitin activating enzyme, putative	63.3802	21.19	42.2851	5.40208	Tb927.11.5170	ubiquitin activating enzyme, putative	27.3	28.8	28.0167	4.80821
Tb927.3.3610	peroxisomal targeting signal type 2 receptor, putative,peroxin 7	9.05858	5.37037	7.21447	2.85089		Tb927.11.14500	2-oxoglutarate dehydrogenase E1 component, putative	2	3.4	2.67038	1.41705		Tb927.10.5760	adenylate kinase, putative	43.7053	40.05	41.8776	5.38811	Tb927.10.5760	adenylate kinase, putative	14.6	17.1	15.8612	3.98743
Tb927.10.3710	proteasome activator protein PA26	4.40838	8.80988	6.60913	2.72446		Tb927.6.1900	bystin, putative	2.5	2.8	2.67033	1.41702		Tb927.10.9800	60S ribosomal protein L22	64.7514	16.02	40.3857	5.33577	Tb927.10.9800	60S ribosomal protein L22	70.7	70.6	70.6546	6.14271
Tb927.8.3060	cytosolic leucyl aminopeptidase, putative,metallo-peptidase, Clan MF, Family M17	9.20064	3.26828	6.23446	2.64026		Tb927.10.1690	nucleotide binding protein, putative	2.7	2.7	2.66893	1.41626		Tb927.11.15070	hypothetical protein, conserved	44.94	34.65	39.795	5.31452	Tb927.11.15070	hypothetical protein, conserved	33.2	58.2	45.705	5.51428
Tb927.7.3940	mitochondrial carrier protein, putative,ADP/ATP mitochondrial translocase, putative,adenine nucleotide mitochondrial translocator, putative	8.66824	3.59597	6.13211	2.61638		Tb927.10.7680	GTPase activating protein, putative	2	2.8	2.40989	1.26897		Tb927.10.8890	kinetoplast DNA-associated protein, putative	61.88	17.31	39.595	5.30725	Tb927.10.8890	kinetoplast DNA-associated protein, putative	77	83.4	80.23	6.32607
Tb927.7.4980	hypothetical protein, conserved,zinc finger protein family member, putative	7.33786	4.61111	5.97449	2.57881		Tb927.8.6200	tubulin folding cofactor D, putative	2	2.3	2.18331	1.12652		Tb927.9.9660	hypothetical protein, conserved	68.16	10.92	39.54	5.30524	Tb927.9.9660	DRBD2	194	174.4	184.21	7.52521
Tb927.7.1920	paraflagellar rod component, putative	7.5128	3.54366	5.52823	2.46682		Tb927.2.5800	sedoheptulose-1,7-bisphosphatase	1.1	3.2	2.14099	1.09828		Tb927.7.4470	hypothetical protein, conserved	55.5	22.61	39.055	5.28744	Tb927.7.4470	hypothetical protein, conserved	20.1	83.3	51.655	5.69084
Tb927.4.4670	hypothetical protein, conserved	7.42067	1.64133	4.531	2.17983		Tb927.9.9730	hypothetical protein, conserved	0.8	3.3	2.08586	1.06064		Tb927.11.2430	dynein heavy chain, putative	67.3227	10.5973	38.96	5.28392	Tb927.11.2430	dynein heavy chain, putative	22.4	55	38.7041	5.27441
Tb927.4.4160	hypothetical protein, conserved	4.31421	4.1517	4.23295	2.08166		Tb927.3.5330	ADP-ribosylation factor GTPase activating protein, putative,centaurin beta 5	2.2	1.9	2.08464	1.0598		Tb927.8.5760	hypothetical protein, conserved	61.979	15.44	38.7095	5.27462	Tb927.8.5760	hypothetical protein, conserved	16.3	47.7	32.0142	5.00064
Tb927.2.510	retrotransposon hot spot (RHS) protein, putative,retrotransposon hot spot protein 4 (RHS4), putative	7.5452	0.753719	4.14946	2.05292		Tb927.3.930	dynein heavy chain, putative	2.1	2	2.03733	1.02668		Tb927.5.1580	hypothetical protein, conserved,zinc finger protein family member, putative	67.6178	6.53883	37.0783	5.2125	Tb927.5.1580	ZC3H13	44.3	25.1	34.7223	5.11779
Tb927.4.1680	hypothetical protein, conserved,ZFP family member, putative	6.48001	1.20229	3.84115	1.94154		Tb927.7.3500	glutathione-S-transferase/glutaredoxin,putative	1.1	2.8	1.92879	0.947696		Tb927.6.1000	cysteine peptidase precursor,cysteine peptidase, Clan CA, family C1, Cathepsin L-like	40.4	28.31	34.355	5.10245	Tb927.6.1000	cysteine peptidase precursor,cysteine peptidase, Clan CA, family C1, Cathepsin L-like	29	37.2	33.1	5.04876
Tb927.9.9820	glyceraldehyde-3-phosphate dehydrogenase, putative	5.57073	1.72409	3.64741	1.86687		Tb927.11.5400	signal recognition particle 54 kDa	1.4	2.3	1.83737	0.877641		Tb927.9.9630	hypothetical protein, conserved	48.1923	19.7936	33.9929	5.08716	Tb927.9.9630	hypothetical protein, conserved	15.4	34.5	24.9448	4.64067
Tb927.3.870	hypothetical protein, conserved	5.10673	1.92706	3.51689	1.8143		Tb927.11.1960	hypothetical protein, conserved,leucine-rich repeat protein (LRRP), putative	2.1	1.4	1.73159	0.792098		Tb927.11.6690	protein kinase, putative	24.65	42.5771	33.6136	5.07097	Tb927.11.6690	protein kinase, putative	36.4	35.5	35.9424	5.16762
Tb927.11.3500	hypothetical protein, conserved	3.94394	2.08333	3.01364	1.5915		Tb927.9.13490	aminopeptidase P, putative,metallo-peptidase, Clan MG, Family M24	2	1.5	1.72748	0.788666		Tb927.11.10010	vacuolar sorting-associated protein-like, putative	56.655	8.80217	32.7286	5.03248	Tb927.11.10010	vacuolar sorting-associated protein-like, putative	44.9	118.6	81.7608	6.35334
Tb927.10.9330	hypothetical protein, conserved	4.78446	1.22568	3.00507	1.5874		Tb927.4.3560	protein phoshatase 1, putative	1.2	2.2	1.70272	0.767841		Tb927.5.295b	retrotransposon hotspot (RHS) protein 1	64.662	0.524093	32.5931	5.02649	Tb927.5.295b	retrotransposon hotspot (RHS) protein 1	26.2	116.1	71.1438	6.15267
Tb927.7.5940	Protein Associated with Differentiation	3.64601	1.82714	2.73657	1.45237		Tb927.7.6180	hypothetical protein, conserved	1.8	1.4	1.58121	0.66103		Tb927.6.3840	reticulon domain protein	38.32	25.75	32.035	5.00158	Tb927.6.3840	reticulon domain protein	43.3	71.1	57.205	5.83807
Tb927.8.570	proteasome regulatory non-ATP-ase subunit 10	3.57526	0.701705	2.13848	1.09659		Tb927.10.6070	universal minicircle sequence binding protein (UMSBP), putative,predicted zinc finger protein	2	1.1	1.56233	0.643699		Tb927.10.14040	vacuolar ATP synthase subunit c, putative	49.6	14.22	31.91	4.99594	Tb927.10.14040	vacuolar ATP synthase subunit c, putative	21.4	85.8	53.57	5.74335
Tb927.3.5150	exonuclease, putative	2.44314	1.46623	1.95469	0.966936		Tb927.8.2630	kinesin, putative	1.6	1.4	1.51733	0.601534		Tb927.8.980	phosphoacetylglucosamine mutase, putative,acetylglucosaminephosphomutase, putative,N-acetylglucosamine-phosphate mutase, putative	53.8527	5.74396	29.7983	4.89716	Tb927.8.980	phosphoacetylglucosamine mutase, putative,acetylglucosaminephosphomutase, putative,N-acetylglucosamine-phosphate mutase, putative	5.2	37.1	21.175	4.40429
Tb10.v4.0247	s-adenosyl-L-methionine-c-24-delta-sterol-methy lt ransferase a, putative,chrX additional, unordered contigs	2.18748	1.45368	1.82058	0.864395		Tb927.3.3850	hypothetical protein, conserved	1.4	1.6	1.51025	0.59479		Tb927.7.2700	NADH-cytochrome B5 reductase, putative	36.8512	21.56	29.2056	4.86817	Tb927.7.2700	NADH-cytochrome B5 reductase, putative	30	32.7	31.3657	4.97112
Tb927.11.12730	chaperone protein DNAj, putative	2.7958	0.595964	1.69588	0.762037		Tb927.8.7090	hypothetical protein, conserved	1.5	1.5	1.47968	0.565288		Tb927.10.6060	universal minicircle sequence binding protein (UMSBP), putative,DNA-binding protein HEXBP, putative,zinc finger protein	25.2656	31.5185	28.392	4.82741	Tb927.10.6060	universal minicircle sequence binding protein (UMSBP), putative,DNA-binding protein HEXBP, putative,zinc finger protein	15.2	11.7	13.4341	3.74783
Tb927.10.12430	hypothetical protein, conserved	3.13911	0.2306	1.68486	0.752626		Tb927.4.2750	hypothetical protein, conserved	1.4	1.3	1.37259	0.456902		Tb927.4.410	CAF 40	24.1107	30.4612	27.286	4.77009	Tb927.4.410	CAF 40	14.1	13.9	13.9692	3.80418
Tb927.10.8640	hypothetical protein, conserved	1.29066	1.92884	1.60975	0.686837		Tb927.10.3900	protein kinase, putative	1.3	1.3	1.30306	0.381899		Tb927.10.5250	hypothetical protein, conserved,zinc finger protein family member, putative	41.3107	12.3933	26.852	4.74696	Tb927.10.5250	hypothetical protein, conserved,zinc finger protein family member, putative	27.7	19.8	23.7433	4.56945
Tb927.11.4770	retrotransposon hot spot protein (RHS, pseudogene), putative,retrotransposon hot spot protein (RHS), degenerate	2.00715	1.19803	1.60259	0.680406		Tb927.11.8100	hypothetical protein, conserved	1.3	1.2	1.27282	0.348033		Tb927.10.12240	short-chain dehydrogenase, putative	53.0092	0.674516	26.8419	4.74641	Tb927.10.12240	short-chain dehydrogenase, putative	8.4	62.1	35.2775	5.14067
Tb927.8.5530	Mov34/MPN/PAD-1 metallopeptidase, putative,metallo-peptidase, Clan MP, Family M67	1.75137	1.3748	1.56308	0.644393		Tb927.6.4750	hypothetical protein, conserved	1.5	0.9	1.1926	0.254109		Tb927.6.1470	hypothetical protein, conserved	22.52	29.83	26.175	4.71012	Tb927.6.1470	hypothetical protein, conserved	102.7	121.3	111.995	6.80729
Tb927.5.1880	inhibitor of serine peptidase (ISP), putative,ecotin family (I11), putative	0.771568	2.25849	1.51503	0.599346		Tb927.6.4120	GTPase activating protein, putative	1.5	0.8	1.17522	0.232932		Tb927.4.100	retrotransposon hot spot protein (RHS, pseudogene), putative,retrotransposon hot spot protein 1 (RHS1), interrupted	37.14	14.73	25.935	4.69683	Tb927.4.100	is_pseudo=true retrotransposon hot spot protein (RHS, pseudogene), putative,retrotransposon hot spot protein 1 (RHS1), interrupted	22.9	33.2	28.075	4.81121
Tb927.11.19800	ZC3H41	2.04918	0.907284	1.47823	0.563871		Tb927.8.3550	mitogen-activated protein kinase 3, putative	1.2	1.1	1.15678	0.210113		Tb927.5.800	casein kinase I, isoform 2	32.0258	19.7528	25.8893	4.69428	Tb927.5.800	casein kinase I, isoform 2	9.5	14.9	12.219	3.61106
Tb927.10.10850	argonaute-like protein	0.74113	1.97863	1.35988	0.443477		Tb927.4.5180	protein kinase, putative	1.2	1.1	1.13392	0.181314		Tb927.2.5530	hypothetical protein, conserved	37.2243	12.1774	24.7008	4.62649	Tb927.2.5530	hypothetical protein, conserved	8.8	6.7	7.7416	2.95263
Tb927.4.3840	nucleolar protein, putative	1.59596	1.12041	1.35818	0.441679		Tb927.10.13710	hypothetical protein, conserved	1.3	0.9	1.09086	0.125468		Tb927.9.5890	solanesyl-diphosphate synthase, putative	35.1863	13.3772	24.2818	4.6018	Tb927.9.5890	solanesyl-diphosphate synthase, putative	35.4	40.3	37.8169	5.24096
Tb927.7.2240	hypothetical protein, conserved	1.30707	1.38677	1.34692	0.429664		Tb927.11.13680	protein phosphatase 1, putative	1	1.1	1.05777	0.081023		Tb927.5.3030	intraflagellar transport protein IFT122, putative	39.8204	8.49347	24.1569	4.59436	Tb927.5.3030	intraflagellar transport protein IFT122, putative	11	18	14.4549	3.85349
Tb927.8.760	nucleolar RNA-binding protein	1.73755	0.93851	1.33803	0.42011		Tb927.11.13680	hypothetical protein, conserved	0.8	1.3	1.05065	0.071276		Tb927.6.2280	hypothetical protein, conserved	47.2228	0.772839	23.9978	4.58483	Tb927.6.2280	hypothetical protein, conserved	228.4	47.5	137.945	7.10795
Tb927.7.3160	dynein heavy chain, cytosolic, putative	1.78158	0.827157	1.30437	0.383349		Tb927.9.11490	60S ribosomal protein L27a,60S ribosomal protein L28,60S ribosomal protein L29	1.2	0.9	1.03777	0.053489		Tb927.8.3560	DNA repair and recombination helicase protein PIF1, putative,DNA repair and recombination protein, mitochondrial precursor, putative	33.5063	13.7595	23.6329	4.56272	Tb927.8.3560	DNA repair and recombination helicase protein PIF1, putative,DNA repair and recombination protein, mitochondrial precursor, putative	21.4	25.2	23.275	4.54071
Tb927.11.11490	60S ribosomal protein L27a,60S ribosomal protein L28,60S ribosomal protein L29	1.39978	1.15282	1.2763	0.351967		Tb927.11.1980	hypothetical protein, conserved,zinc finger protein family member, putative	1.1	0.9	1.0141	0.0201965		Tb927.8.4210	hypothetical protein, conserved	32.62	14.25	23.435	4.55059	Tb927.8.4210	hypothetical protein, conserved	23.4	34.4	28.875	4.85175
Tb927.11.3840	hypothetical protein, conserved	1.55695	0.811564	1.18426	0.243981		Tb927.11.12530	hypothetical protein, conserved	0.7	1.2	0.950781	-0.072815		Tb927.11.14130	ribosomal protein L18, putative	20.7461	23.8111	22.2786	4.47759	Tb927.11.14130	ribosomal protein L18, putative	10.6	12.5	11.5218	3.52629
Tb927.11.8270	hypothetical protein, conserved	1.74726	0.49217	1.11971	0.163129		Tb927.5.1100	peroxisome targeting signal 1 receptor	1	0.9	0.916909	-0.12515		Tb927.10.14550	ATP-dependent DEAD/H RNA helicase, putative	24.757	14.0741	19.4155	4.27914	Tb927.10.14550	ATP-dependent DEAD/H RNA helicase, putative	12.2	11.4	11.7809	3.55838
Tb927.11.14870	NAD synthase, putative	1.36934	0.853256	1.1113	0.152248		Tb927.8.1870	Golgi/lysosome glycoprotein 1	1	0.8	0.875431	-0.191935		Tb927.8.1960	hypothetical protein, conserved	32.804	5.55513	19.1796	4.2615	Tb927.8.1960	hypothetical protein, conserved	16.5	18.6	17.5558	4.13387
Tb927.10.170	pseudouridine synthase, Cbf5p	1.432	0.596149	1.01407	0.0201604		Tb927.6.4410	S-adenosylmethionine decarboxylase	1	0.7	0.859769	-0.217979		Tb927.8.7530	3,2-trans-enoyl-CoA isomerase, mitochondrial precursor, putative	32.0035	5.98166	18.9926	4.24736	Tb927.8.7530	3,2-trans-enoyl-CoA isomerase, mitochondrial precursor, putative	10	14.1	12.0265	3.58815
Tb927.3.5400	hypothetical protein, conserved	1.31319	0.399363	0.856277	-0.223851		Tb927.7.4700	hypothetical protein, conserved	1	0.7	0.850344	-0.233881		Tb927.8.7780	hypothetical protein, conserved	27.4014	8.54466	17.973	4.16776	Tb927.8.7780	hypothetical protein, conserved	16.1	13.7	14.8957	3.89682
Tb927.4.4950	hypothetical protein, conserved	0.949434	0.654608	0.802021	-0.318288		Tb927.10.9250	G-actin binding protein, putative,CAP/Srv2p, putative	0.9	0.8	0.837119	-0.256495		Tb927.10.9440	NADH dehydrogenase	35.1252	0.786011	17.9556	4.16636	Tb927.10.9440	NADH dehydrogenase	6.7	48.3	27.5026	4.7815
Tb927.11.8090	protein phosphatase 1, putative	0.80002	0.58888	0.69445	-0.526057		Tb927.8.6390	lysophospholipase, putative,alpha/beta hydrolase, putative	1	0.6	0.812185	-0.30012		Tb927.2.340	retrotransposon hot spot (RHS) protein, putative,retrotransposon hot spot protein 4 (RHS4), putative	24.8863	10.1826	17.5344	4.13212	Tb927.2.340	retrotransposon hot spot (RHS) protein, putative,retrotransposon hot spot protein 4 (RHS4), putative	10	19.5	14.7244	3.88013
Tb927.11.810	hypothetical protein, conserved	1.10614	0.27281	0.689477	-0.536426		Tb927.11.15030	small GTPase	0.7	0.9	0.803186	-0.316194		Tb927.9.6070	40S ribosomal protein S3, putative	20.5678	12.6668	16.6173	4.05462	Tb927.9.6070	40S ribosomal protein S3, putative	11	11.2	11.0805	3.46996
Tb927.8.5030	trafficking protein particle complex subunit 3, putative,TRAPP, putative,transport protein particle (TRAPP) component, Bet3, putative	0.731123	0.523799	0.627461	-0.672402		Tb927.11.12240	ubiquitin carboxyl-terminal hydrolase, putative,cysteine peptidase, Clan CA, family C19, putative	0.8	0.8	0.793355	-0.333961		Tb927.11.8880	hypothetical protein, conserved	26.9275	5.60757	16.2675	4.02392	Tb927.11.8880	hypothetical protein, conserved	7.5	13.4	10.4393	3.38395
Tb927.10.13800	hypothetical protein, conserved	1.10574	0.109107	0.607425	-0.719221		Tb927.3.5620	hypothetical protein, conserved	0.8	0.8	0.784688	-0.349809		Tb927.9.6290	arginine kinase	29.9804	1.86118	15.9208	3.99284	Tb927.9.6290	arginine kinase	11.6	13	12.2911	3.61954
Tb927.6.620	hypothetical protein, conserved	0.756428	0.427925	0.592177	-0.755901		Tb927.5.2270	hypothetical protein, conserved	0.9	0.6	0.766867	-0.382952		Tb927.11.3570	aminopeptidase, putative,metallo-peptidase, Clan MA(E) Family M1	16.3704	14.6696	15.52	3.95606	Tb927.11.3570	aminopeptidase, putative,metallo-peptidase, Clan MA(E) Family M1	6.1	6.6	6.36841	2.67093
Tb927.11.10760	kinesin-like protein, putative	0.897209	0.276856	0.587032	-0.768488		Tb927.9.10350	hypothetical protein, conserved	0.9	0.5	0.692063	-0.531024		Tb927.11.10790	40S ribosomal protein SA, putative	18.4854	11.8701	15.1777	3.92388	Tb927.11.10790	40S ribosomal protein SA, putative	8.7	23.7	16.2375	4.02125
Tb05.5K5.200	guanine deaminase, putative,guanase, putative,guanine aminase, putative,guanine aminohydrolase, putative,BAC from homologous region on chr5	0.886342	0.246728	0.566535	-0.819763		Tb927.8.7250	hypothetical protein, conserved	0.7	0.6	0.661648	-0.595865		Tb927.4.1360	hypothetical protein, conserved	14.1139	15.7506	14.9323	3.90036	Tb927.4.1360	hypothetical protein, conserved	7.7	10.3	8.996	3.16928
Tb927.5.3450	hypothetical protein, conserved	0.63916	0.48329	0.561225	-0.833348		Tb927.10.5040	chaperone protein DNAj, putative	0.6	0.6	0.633741	-0.658034		Tb927.6.4390	kinesin, putative	15.7328	14.05	14.8914	3.89641	Tb927.6.4390	kinesin, putative	12.1	12.1	12.0907	3.59582
Tb927.6.5070	hypothetical protein, conserved	0.69429	0.219286	0.456788	-1.1304		Tb927.10.9430	phosphoribosylpyrophosphate synthetase, putative	0.3	0.8	0.567048	-0.818457		Tb927.8.2520	acetyl-CoA synthetase, putative	24.8072	4.34378	14.5755	3.86547	Tb927.8.2520	acetyl-CoA synthetase, putative	73.7	31.6	52.6932	5.71955
Tb927.11.1020	ribokinase, putative	0.664984	0.248011	0.456497	-1.13132		Tb927.11.9700	nascent polypeptide associated complex alpha subunit, putative	0.6	0.5	0.552015	-0.85722		Tb927.9.14430	casein kinase II, putative	19.3722	9.63622	14.5042	3.8584	Tb927.9.14430	casein kinase II, putative	14	41.9	27.952	4.80488
Tb927.8.3770	mitogen-activated protein kinase, putative	0.548757	0.322307	0.435532	-1.19915		Tb927.10.9160	hypothetical protein, conserved	0.6	0.4	0.521755	-0.938556		Tb05.5K5.70	nucleolar RNA helicase II, putative,nucleolar RNA helicase Gu, putative,BAC from homologous region on chr5	19.7889	8.85848	14.3237	3.84033	Tb05.5K5.70	nucleolar RNA helicase II, putative,nucleolar RNA helicase Gu, putative,BAC from homologous region on chr5	9.7	16.4	13.0803	3.70933
Tb927.11.2410	hypothetical protein, conserved	0.399987	0.379753	0.38987	-1.35893		Tb927.10.12590	hypothetical protein, conserved	0.5	0.5	0.507756	-0.977794		Tb927.10.1170	intraflagellar transport protein IFT172, putative	22.6852	5.62335	14.1542	3.82316	Tb927.10.1170	intraflagellar transport protein IFT172, putative	12.2	21.3	16.7655	4.06743
Tb927.11.8290	exosome complex exonuclease RRP44, putative	0.45131	0.326222	0.388766	-1.36303		Tb927.2.4850	hypothetical protein, conserved	0.7	0.4	0.505822	-0.983299		Tb927.4.2240	hypothetical protein, conserved	14.9299	13.0252	13.9775	3.80504	Tb927.4.2240	hypothetical protein, conserved	13.9	14.1	14.002	3.80756
Tb927.11.7170	seryl-tRNA synthetase, putative	0.476836	0.293655	0.385245	-1.37615		Tb927.3.3130	hypothetical protein, conserved	0.6	0.4	0.492578	-1.02158		Tb927.3.2830	hypothetical protein, conserved	24.4696	2.20505	13.3373	3.7374	Tb927.3.2830	hypothetical protein, conserved	4.6	25.7	15.1409	3.92038
Tb927.7.970	hypothetical protein, conserved	0.351791	0.365347	0.358569	-1.47968		Tb927.11.2490	kinesin, putative,Unc104-like kinesin, putative	0.5	0.4	0.466036	-1.10149		Tb927.2.100	retrotransposon hot spot (RHS) protein, putative,retrotransposon hot spot protein 1 (RHS1), putative	18.6282	7.09814	12.8632	3.68518	Tb927.2.100	retrotransposon hot spot (RHS) protein, putative,retrotransposon hot spot protein 1 (RHS1), putative	6	12.8	9.38349	3.23012
Tb927.1.3300	myotubularin, putative,zinc-binding phosphatase, putative	0.445205	0.246149	0.345677	-1.5325		Tb927.10.1860	hypothetical protein, conserved	0.5	0.4	0.455027	-1.13598		Tb927.10.5610	40S ribosomal protein S9, putative	13.0888	12.5779	12.8334	3.68183	Tb927.10.5610	40S ribosomal protein S9, putative	8.1	7.6	7.86784	2.97597
Tb927.10.8630	hypothetical protein, conserved	0.46505	0.207175	0.336113	-1.57298		Tb927.1.2210	hypothetical protein, conserved	0.4	0.4	0.406395	-1.29905		Tb927.10.14470	intraflagellar transport protein IFT140, putative	18.1106	7.40138	12.756	3.6731	Tb927.10.14470	intraflagellar transport protein IFT140, putative	8.4	13.8	11.0582	3.46704
Tb927.6.640	kinetoplastid-specific phospho-protein phosphatase, putative	0.409362	0.248825	0.329094	-1.60343		Tb927.11.14250	t-complex protein 1, epsilon subunit, putative	0.4	0.3	0.39245	-1.34942		Tb927.9.3990	ribosomal protein S7, putative	12.3528	13.0648	12.7088	3.66775	Tb927.9.3990	ribosomal protein S7, putative	8.8	8.5	8.65485	3.11351
Tb927.10.1590	ribosomal proteins L36, putative	0.419721	0.215016	0.317369	-1.65577		Tb927.11.3030	phosphoribosylpyrophosphate synthetase, putative	0.3	0.5	0.392019	-1.351		Tb927.10.12840	mitochondrial carrier protein, putative,mitochondrial 2-oxoglutarate/malate carrier protein, putative	17.1539	8.10736	12.6306	3.65886	Tb927.10.12840	mitochondrial carrier protein, putative,mitochondrial 2-oxoglutarate/malate carrier protein, putative	6.6	8.5	7.57185	2.92065
Tb927.7.3820	hypothetical protein, conserved	0.370352	0.209724	0.290038	-1.78569		Tb927.10.3500	RNA-binding protein, putative	0.4	0.4	0.384607	-1.37854		Tb927.6.700	alanyl-tRNA synthetase, putative	20.8761	3.83014	12.3531	3.62681	Tb927.6.700	alanyl-tRNA synthetase, putative	3.6	9.3	6.47244	2.69431
Tb927.11.9040	hypothetical protein, conserved	0.463566	0.0488687	0.256217	-1.96456		Tb927.1.3070	hypothetical protein, conserved	0.5	0.3	0.379504	-1.39781		Tb927.11.6600	hypothetical protein, conserved	19.0975	5.5164	12.3069	3.6214	Tb927.11.6600	hypothetical protein, conserved	26.4	21.3	23.821	4.57416
Tb927.3.3670	RNA-binding protein, putative	0.321368	0.153635	0.237501	-2.07399		Tb927.11.4420	hypothetical protein, conserved	0.4	0.4	0.373331	-1.42147		Tb927.3.3060	hypothetical protein, conserved	21.3176	3.27101	12.2943	3.61992	Tb927.3.3060	hypothetical protein, conserved	18.1	10.4	14.2569	3.83359
Tb927.10.1420	methionine aminopeptidase 2, putative,metallo- peptidase, Clan MG, Family M24	0.19925	0.269287	0.234268	-2.09377		Tb927.2.2650	hypothetical protein, conserved	0.4	0.3	0.368506	-1.44024		Tb927.10.1490	hypothetical protein, conserved	16.1937	8.39118	12.2924	3.6197	Tb927.10.1490	hypothetical protein, conserved	10.1	15.3	12.74	3.67129
Tb927.10.2700	hypothetical protein, conserved,predicted WD40 repeat protein	0.304611	0.154607	0.229609	-2.12275		Tb927.7.1530	hypothetical protein, conserved	0.4	0.3	0.359188	-1.47719		Tb927.11.8770	ATP-dependent DEAD/H RNA helicase, putative,DEAD box RNA helicase, putative,RNA helicase, putative	19.78	2.50576	11.1429	3.47805	Tb927.11.8770	ATP-dependent DEAD/H RNA helicase, putative,DEAD box RNA helicase, putative,RNA helicase, putative	7.2	23.6	15.4091	3.94571
Tb927.7.880	RNA-binding protein, putative	0.375171	0.0642986	0.219735	-2.18616		Tb927.11.11540	DNA topoisomerase II, putative	0.3	0.4	0.355669	-1.49139		Tb927.11.14330	hypothetical protein, conserved	18.0416	3.87478	10.9582	3.45394	Tb927.11.14330	hypothetical protein, conserved	4.7	7.6	6.15358	2.62143
Tb927.11.14160	hypothetical protein, conserved	0.353532	0.0731723	0.213352	-2.22869		Tb927.11.6320	MRB1-associated protein	0.3	0.4	0.352997	-1.50227		Tb927.5.760	hypothetical protein, conserved	15.3802	6.1874	10.7838	3.43079	Tb927.5.760	hypothetical protein, conserved	8.7	7.8	8.26961	3.04782
Tb927.6.3160	splicing factor 3a, putative	0.2328	0.176722	0.204761	-2.28799		Tb927.6.3100	hypothetical protein, conserved	0.2	0.4	0.313938	-1.67145		Tb927.10.10460	histone H2B, putative	15.5893	5.93599	10.7626	3.42796	Tb927.10.10460	histone H2B, putative	6.5	7.2	6.82832	2.77153
Tb927.8.1090	non-canonical poly (A) polymerase	0.270947	0.122583	0.196765	-2.34545		Tb927.11.4800	clathrin coat assembly protein, putative	0.3	0.3	0.309035	-1.69416		Tb927.9.7720	hypothetical protein, conserved,predicted tetratricopeptide repeat protein	17.2454	4.22774	10.7366	3.42446	Tb927.9.7720	hypothetical protein, conserved,predicted tetratricopeptide repeat protein	4.5	10.1	7.3037	2.86863
Tb927.11.3280	kinesin, putative,MCAK-like kinesin, putative	0.185714	0.0933323	0.139523	-2.84142		Tb927.10.5140	protein kinase, putative,mitogen-activated protein kinase 2, putative	0.2	0.4	0.305693	-1.70984		Tb927.11.7590	hypothetical protein, conserved	10.6963	9.45466	10.0755	3.33277	Tb927.11.7590	hypothetical protein, conserved	13.7	15.9	14.7863	3.88619
Tb927.3.2290	chaperone protein DNAj, putative	0.115589	0.106646	0.111118	-3.16984		Tb927.10.15330	hypothetical protein, conserved	0.2	0.4	0.303104	-1.72212		Tb927.3.3270	ATP-dependent phosphofructokinase	14.3604	5.37621	9.86831	3.3028	Tb927.3.3270	ATP-dependent phosphofructokinase	6.8	14.5	10.6318	3.41031
Tb927.7.2710	NADH-cytochrome B5 reductase, putative	0.119453	0.0887854	0.104119	-3.26369		Tb927.10.15360	hypothetical protein, conserved	0.3	0.3	0.299768	-1.73808		Tb927.4.4490	multidrug resistance protein E,p-glycoprotein	12.1647	7.41528	9.79001	3.29131	Tb927.4.4490	multidrug resistance protein E,p-glycoprotein	8.3	7.9	8.09839	3.01764
Tb927.4.730	hypothetical protein, conserved	0.100336	0.043523	0.0719296	-3.79727		Tb927.5.3900	hypothetical protein, conserved	0.3	0.2	0.282779	-1.82225		Tb927.11.9530	14-3-3-like protein, putative	12.5615	6.65862	9.61007	3.26455	Tb927.11.9530	14-3-3-like protein, putative	8.3	16.9	12.6241	3.6581
Tb927.11.10330	hypothetical protein, conserved	0.092418	0.0377914	0.0651047	-3.94109		Tb927.8.5950	protein kinase, putative	0.3	0.3	0.266667	-1.90689		Tb927.3.2230	succinyl-CoA synthetase alpha subunit, putative	13.5103	5.52119	9.51574	3.25032	Tb927.3.2230	succinyl-CoA synthetase alpha subunit, putative	6.4	9.2	7.75815	2.95571
Tb927.7.2680	hypothetical protein, conserved,zinc finger protein family member, putative	0.10187	0.020528	0.0611992	-4.03034		Tb927.11.4950	hypothetical protein, conserved	0.2	0.3	0.263759	-1.92271		Tb927.1.120	retrotransposon hot spot (RHS) protein, putative,retrotransposon hot spot protein 4 (RHS4), putative	11.4897	7.12887	9.30929	3.21867	Tb927.1.120	retrotransposon hot spot (RHS) protein, putative,retrotransposon hot spot protein 4 (RHS4), putative	3.2	10.6	6.91393	2.78951
Tb927.2.5150	TPR-repeat protein, putative	0.0816344	0.0261005	0.0538674	-4.21444		Tb927.1.1960	chaperone protein DNAj, putative	0.3	0.2	0.246341	-2.02127		Tb927.10.14990	intraflagellar transport protein IFT80/CHE2, putative	15.8075	1.93548	8.87148	3.14917	Tb927.10.14990	intraflagellar transport protein IFT80/CHE2, putative	1.8	8.6	5.20899	2.381
Tb927.9.15030	DNA polymerase epsilon subunit b, putative	0.0477409	0.0529948	0.0503679	-4.31135		Tb927.2.2430	casein kinase II, alpha chain	0.2	0.2	0.219263	-2.18927		Tb927.4.1790	ribosomal protein L3, putative	11.9086	5.61079	8.75971	3.13088	Tb927.4.1790	ribosomal protein L3, putative	2.6	6.8	4.69527	2.23121
							Tb927.9.8100	nascent polypeptide associated complex subunit, putative	0.2	0.2	0.19839	-2.33359		Tb927.10.6050	clathrin heavy chain	13.2889	4.11816	8.70352	3.1216	Tb927.10.6050	clathrin heavy chain	4.1	9.2	6.63543	2.73019
							Tb927.7.4450	hypothetical protein, conserved	0.2	0.2	0.196255	-2.3492		Tb927.3.4720	dynamin, putative,vacuolar sortin protein 1, putative	15.9792	0.82671	8.40297	3.0709	Tb927.3.4720	dynamin, putative,vacuolar sortin protein 1, putative	2.3	16.3	9.30802	3.21847
							Tb927.11.12800	ribonucleoside-diphosphate reductase small chain	0.2	0.2	0.188773	-2.40528		Tb927.10.14600	40S ribosomal protein S2, putative	8.60374	8.13424	8.36899	3.06505	Tb927.10.14600	40S ribosomal protein S2, putative	4.1	6.4	5.25791	2.39449
								DNA polymerase epsilon subunit b, putative	0.2	0.2	0.186436	-2.42325		Tb927.1.1670	hypothetical protein, conserved	13.201	3.5292	8.36511	3.06438	Tb927.1.1670	hypothetical protein, conserved	4.8	9	6.90586	2.78782
							Tb927.10.6680	hypothetical protein, conserved,member of the NOL1/NOP2/sun family of proteins	0.2	0.2	0.184563	-2.43781		Tb927.11.6790	hypothetical protein, conserved,predicted WD40 repeat protein	12.5224	4.16629	8.34436	3.0608	Tb927.11.6790	hypothetical protein, conserved,predicted WD40 repeat protein	2.1	4.1	3.11677	1.64005
							Tb927.9.6650	hypothetical protein, conserved	0.1	0.2	0.183365	-2.44721		Tb927.7.6820	hypothetical protein, conserved	10.4646	6.0694	8.26702	3.04737	Tb927.7.6820	hypothetical protein, conserved	11.3	7.9	9.58035	3.26008
							Tb927.3.5540	dynein intermediate chain WDRD34, putative	0.2	0.2	0.180765	-2.46781		Tb927.5.3800	glutamine hydrolysing (not ammonia-dependent) carbomoyl phosphate synthase, putative	12.1201	3.8073	7.96369	2.99344	Tb927.5.3800	glutamine hydrolysing (not ammonia-dependent) carbomoyl phosphate synthase, putative	1.8	5	3.40286	1.76675
							Tb927.8.3310	acetyltransferase, putative	0.2	0.1	0.176895	-2.49903		Tb927.2.450	retrotransposon hot spot (RHS) protein, putative,retrotransposon hot spot protein 4 (RHS4), putative	11.5384	4.25473	7.89657	2.98123	Tb927.2.450	retrotransposon hot spot (RHS) protein, putative,retrotransposon hot spot protein 4 (RHS4), putative	5.6	11.6	8.56217	3.09798
							Tb927.11.10470	hypothetical protein, conserved	0.2	0.1	0.16524	-2.59737		Tb927.6.4480	valyl-tRNA synthetase, putative	11.9206	3.7624	7.84151	2.97113	Tb927.6.4480	valyl-tRNA synthetase, putative	4	9.2	6.58363	2.71888
							Tb927.9.3630	hypothetical protein, conserved	0.2	0.1	0.161709	-2.62853		Tb927.3.3760	tryparedoxin	13.4102	2.0684	7.73931	2.9522	Tb927.3.3760	tryparedoxin	1.8	5.7	3.7744	1.91625
							Tb927.9.5730	nucleosome assembly protein-like protein	0.2	0.1	0.157797	-2.66386		Tb927.11.13920	kinesin-II 85 Kd subunit, putative	12.4303	2.92457	7.67745	2.94063	Tb927.11.13920	kinesin-II 85 Kd subunit, putative	4	15.5	9.72656	3.28193
							Tb927.11.2670	Nucleoporin	0.1	0.1	0.136656	-2.87138		Tb927.10.2560	mitochondrial malate dehydrogenase	8.91532	6.31154	7.61343	2.92855	Tb927.10.2560	mitochondrial malate dehydrogenase	8.1	13	10.5684	3.40169
							Tb927.11.1380	hypothetical protein,chrXI additional, unordered contigs	0.1	0.1	0.0875737	-3.51336		Tb927.3.1840	3-oxo-5-alpha-steroid 4-dehydrogenase, putative	11.9959	2.62051	7.30822	2.86952	Tb927.3.1840	3-oxo-5-alpha-steroid 4-dehydrogenase, putative	5.4	9.4	7.42528	2.89245
							Tb927.11.11340	gamma-tubulin complex subunit, putative,spindle pole body component alp6, putative	0.1	0.1	0.0831889	-3.58746		Tb10.v4.0033	pumillo RNA binding protein PUF1,chrX additional, unordered contigs	11.5099	3.05769	7.2838	2.86469	Tb10.v4.0033	pumillo RNA binding protein PUF1,chrX additional, unordered contigs	4.8	4.7	4.76041	2.25109
														Tb927.11.10030	60S ribosomal protein L29, putative	7.73174	6.81158	7.27166	2.86228	Tb927.11.10030	60S ribosomal protein L29, putative	6.4	4.7	5.56995	2.47766
														Tb927.5.1210	short-chain dehydrogenase, putative	7.93315	6.47873	7.20594	2.84919	Tb927.5.1210	short-chain dehydrogenase, putative	3.1	4.8	3.90926	1.96689
														Tb927.10.14950	RNA binding protein, putative,zinc finger protein family member, putative	11.4691	2.83804	7.15356	2.83866	Tb927.10.14950	RNA binding protein, putative,zinc finger protein family member, putative	10.5	7.3	8.85263	3.14611
														Tb927.11.6300	40S ribosomal protein S5, putative	5.4333	8.82752	7.13041	2.83399	Tb927.11.6300	40S ribosomal protein S5, putative	5.4	5.2	5.2815	2.40095
														Tb927.11.16280	60S ribosomal protein L2, putative,60S ribosomal protein L8, putative	8.25257	5.94473	7.09865	2.82754	Tb927.11.16280	60S ribosomal protein L2, putative,60S ribosomal protein L8, putative	6.3	6.5	6.41961	2.68249
														Tb927.10.1510	NOT1	8.56116	5.36818	6.96467	2.80006	Tb927.10.1510	NOT1	9.7	7.6	8.64671	3.11215
														Tb927.9.8740	RNA-binding protein	12.1888	1.64887	6.91886	2.79053	Tb927.9.8740	RNA-binding protein	10.5	6.5	8.53741	3.0938
														Tb927.9.9060	Lsm12	8.55696	5.24077	6.89887	2.78636	Tb927.9.9060	p21 antigen protein, putative	5.2	5.1	5.16455	2.36864
														Tb927.11.2260	eukaryotic translation initiation factor 4e, putative	7.5332	5.83692	6.68506	2.74094	Tb927.11.2260	eukaryotic translation initiation factor 4e, putative	9	7.5	8.23865	3.04241
														Tb927.5.3810	orotidine-5-phosphate decarboxylase/orotate phosphoribosyltransferase, putative,OMPDCase-OPRTase, putative	10.7449	2.56148	6.6532	2.73405	Tb927.5.3810	orotidine-5-phosphate decarboxylase/orotate phosphoribosyltransferase, putative,OMPDCase-OPRT	447.5	165.7	306.586	8.26015
														Tb927.8.4450	RNA-binding protein, putative	8.74274	4.51133	6.62704	2.72836	Tb927.8.4450	RNA-binding protein, putative	0.8	5.8	3.2687	1.70872
														Tb927.6.2250	rac serine-threonine kinase, putative,protein kinase, putative	5.69558	7.50515	6.60036	2.72255	Tb927.6.2250	rac serine-threonine kinase, putative,protein kinase, putative	2.2	1.9	2.05429	1.03864
														Tb927.3.1120	GTP-binding nuclear protein rtb2, putative	7.87027	5.14254	6.50641	2.70186	Tb927.3.1120	GTP-binding nuclear protein rtb2, putative	4.2	4.9	4.56716	2.1913
														Tb927.3.4760	dynamin, putative,vacuolar sortin protein 1, putative	11.473	1.40804	6.44054	2.68718	Tb927.3.4760	dynamin, putative,vacuolar sortin protein 1, putative	1.5	9.4	5.48731	2.4561
														Tb927.8.1990	tryparedoxin peroxidase	7.78198	4.83594	6.30896	2.6574	Tb927.8.1990	tryparedoxin peroxidase	4.3	2.8	3.51792	1.81472
														Tb927.4.400	RNA-binding protein, putative	8.61674	3.95476	6.28575	2.65208	Tb927.4.400	RNA-binding protein, putative	11.4	6.4	8.89851	3.15356
														Tb927.11.14750	hypothetical protein, conserved	11.0706	1.20331	6.13696	2.61752	Tb927.11.14750	hypothetical protein, conserved	2.9	1.8	2.39348	1.25911
														Tb927.8.2540	3-ketoacyl-CoA thiolase, putative	11.1141	1.13684	6.12548	2.61482	Tb927.8.2540	3-ketoacyl-CoA thiolase, putative	3.2	16.7	9.96395	3.31672
														Tb927.11.6140	40S ribosomal protein S15A, putative	9.40111	2.79588	6.09849	2.60845	Tb927.11.6140	40S ribosomal protein S15A, putative	7.7	8.2	7.95288	2.99148
														Tb927.8.2780	RNA-binding protein RBP10, putative	11.9509	0.187845	6.06936	2.60154	Tb927.8.2780	RBP10	3385.1	1921	2653.03	11.3734
														Tb927.10.6880	glyceraldehyde 3-phosphate dehydrogenase, cytosolic	7.52155	4.59037	6.05596	2.59836	Tb927.10.6880	glyceraldehyde 3-phosphate dehydrogenase, cytosolic	4.4	34.1	19.2424	4.26622
														Tb927.10.7330	40S ribosomal protein S24E, putative	7.48011	4.45427	5.96719	2.57705	Tb927.10.7330	40S ribosomal protein S24E, putative	3.6	3.7	3.63262	1.86101
														Tb927.4.3060	hypothetical protein, conserved	4.35003	7.11538	5.73271	2.51922	Tb927.4.3060	hypothetical protein, conserved	9.7	6.8	8.2613	3.04637
														Tb927.6.2790	L-threonine 3-dehydrogenase, putative	6.65876	4.69191	5.67533	2.50471	Tb927.6.2790	L-threonine 3-dehydrogenase, putative	3.7	11.8	7.7501	2.95421
														Tb927.10.7410	succinyl-CoA ligase [GDP-forming] beta-chain, putative	8.73686	2.49495	5.61591	2.48952	Tb927.10.7410	succinyl-CoA ligase [GDP-forming] beta-chain, putative	4.4	8.1	6.23744	2.64095
														Tb927.2.470	retrotransposon hot spot (RHS) protein, putative,retrotransposon hot spot protein 4 (RHS4), putative	7.97999	3.23996	5.60997	2.48799	Tb927.2.470	retrotransposon hot spot (RHS) protein, putative,retrotransposon hot spot protein 4 (RHS4), putative	3.7	7.6	5.6862	2.50746
														Tb927.2.2510	hypothetical protein, conserved	7.77213	3.05962	5.41588	2.43719	Tb927.2.2510	hypothetical protein, conserved	3.2	4.7	3.98586	1.99489
														Tb927.7.6360	histone H2A, putative	7.14236	3.63883	5.3906	2.43044	Tb927.7.6360	histone H2A, putative	4.5	6.7	5.61546	2.48941
														Tb927.9.12360	RBP35	5.82641	4.8221	5.32425	2.41258	Tb927.9.12360	RNA-binding protein, putative	6.4	5	5.71519	2.5148
														Tb927.10.13270	periodic tryptophan protein 2, putative,predicted WD40 repeat protein,predicted involvement in cytokinesis,predicted involvement in cell separation	5.92607	4.69831	5.31219	2.40931	Tb927.10.13270	periodic tryptophan protein 2, putative,predicted WD40 repeat protein,predicted involvement in cytokinesis,predicted involvement in cell separation	7.1	6.9	7.04296	2.81618
														Tb927.11.9490	hypothetical protein, conserved	9.34703	1.04229	5.19466	2.37703	Tb927.11.9490	hypothetical protein, conserved	4.1	5.9	5.01408	2.32599
														Tb927.10.15410	glycosomal malate dehydrogenase	7.16132	3.0315	5.09641	2.34948	Tb927.10.15410	glycosomal malate dehydrogenase	2.3	4.8	3.54244	1.82474
														Tb927.11.7140	RBP45	5.33565	4.68905	5.01235	2.32549	Tb927.11.7140	hypothetical protein, conserved	10.4	7.1	8.75228	3.12966
														Tb927.6.5010	hypothetical protein, conserved	7.56646	2.42723	4.99684	2.32102	Tb927.6.5010	hypothetical protein, conserved	5.9	3.9	4.8937	2.29092
														Tb927.8.750	nucleolar RNA-binding protein, putative	5.54683	4.30476	4.92579	2.30036	Tb927.8.750	nucleolar RNA-binding protein, putative	7.2	4.6	5.92533	2.5669
														Tb927.3.3940	RNA-binding protein, putative	7.8645	1.91468	4.88959	2.28971	Tb927.3.3940	RNA-binding protein, putative	6.6	5.2	5.9102	2.56321
														Tb927.1.1370	rRNA biogenesis protein, putative	6.63488	2.99634	4.81561	2.26772	Tb927.1.1370	rRNA biogenesis protein, putative	1.9	7.3	4.62514	2.2095
														Tb927.6.3740	heat shock 70 kDa protein, mitochondrial precursor, putative	7.06646	2.24418	4.65532	2.21888	Tb927.6.3740	heat shock 70 kDa protein, mitochondrial precursor, putative	2.1	7.1	4.55801	2.1884
														Tb927.4.2040	hypothetical protein, conserved	5.01303	4.12751	4.57027	2.19228	Tb927.4.2040	hypothetical protein, conserved	3.7	3	3.35233	1.74517
														Tb927.10.13280	hypothetical protein, conserved	8.03215	1.08407	4.55811	2.18844	Tb927.10.13280	hypothetical protein, conserved	1.4	3.8	2.57856	1.36657
														Tb927.10.8430	40S ribosomal protein S12, putative	7.31882	1.58441	4.45162	2.15433	Tb927.10.8430	40S ribosomal protein S12, putative	2	6.9	4.47612	2.16225
														Tb927.10.13780	glycogen synthase kinase 3	8.10571	0.751431	4.42857	2.14684	Tb927.10.13780	glycogen synthase kinase 3	3.2	6.6	4.90148	2.29322
														Tb927.10.9840	chaperone protein DNAj, putative	2.77826	5.79936	4.28881	2.10058	Tb927.10.9840	chaperone protein DNAj, putative	2.4	2.5	2.41938	1.27464
														Tb927.11.3590	40S ribosomal protein S4, putative	5.25693	3.26834	4.26263	2.09174	Tb927.11.3590	40S ribosomal protein S4, putative	3.8	4.8	4.30032	2.10444
														Tb927.6.4280	glyceraldehyde 3-phosphate dehydrogenase, glycosomal	5.84325	2.64692	4.24509	2.08579	Tb927.6.4280	glyceraldehyde 3-phosphate dehydrogenase, glycosomal	1.6	12.9	7.23726	2.85544
														Tb927.8.1170	hypothetical protein, conserved	6.80278	1.46899	4.13589	2.0482	Tb927.8.1170	hypothetical protein, conserved	4.3	6.3	5.32148	2.41183
														Tb927.11.7780	hypothetical protein, conserved	7.08886	1.15116	4.12001	2.04265	Tb927.11.7780	hypothetical protein, conserved	2.6	6.9	4.76641	2.2529
														Tb927.10.14820	mitochondrial carrier protein, putative,ADP/ATP translocase 1, putative	5.73693	2.38644	4.06169	2.02208	Tb927.10.14820	mitochondrial carrier protein, putative,ADP/ATP translocase 1, putative	1.9	4.1	3.04483	1.60636
														Tb927.9.10310	mitochondrial carrier protein, putative,mitochondrial phosphate transporter, putative	5.4182	2.68516	4.05168	2.01852	Tb927.9.10310	mitochondrial carrier protein, putative,mitochondrial phosphate transporter, putative	2.6	3.2	2.94384	1.5577
														Tb927.10.11760		6.28455	1.79429	4.03942	2.01415	Tb927.10.11760		5.6	4.1	4.81167	2.26654
														Tb927.4.760	gamma-adaptin 1, putative,AP-1 adapter complex gamma subunit, putative	7.19252	0.849795	4.02116	2.00761	Tb927.4.760	gamma-adaptin 1, putative,AP-1 adapter complex gamma subunit, putative	4.7	5.3	4.97659	2.31516
														Tb927.11.6870	14-3-3-like protein, putative	6.13436	1.78651	3.96044	1.98566	Tb927.11.6870	14-3-3-like protein, putative	4.5	7.3	5.85931	2.55073
														Tb927.1.2230	calpain-like protein fragment, putative	6.22461	1.67681	3.95071	1.98211	Tb927.1.2230	calpain-like protein fragment, putative	3.9	6.3	5.10176	2.351
														Tb927.6.4440	hypothetical protein, conserved	5.94868	1.85281	3.90074	1.96375	Tb927.6.4440	hypothetical protein, conserved	3.9	3.8	3.84538	1.94312
														Tb927.10.2840	ribosomal protein S25, putative	6.28447	1.41005	3.84726	1.94383	Tb927.10.2840	ribosomal protein S25, putative	5.7	3.4	4.59254	2.19929
														Tb927.9.8200	hypothetical protein, conserved	5.31094	2.07224	3.69159	1.88424	Tb927.9.8200	hypothetical protein, conserved	0.5	2.5	1.47937	0.564979
														Tb927.11.3240	T-complex protein 1, zeta subunit, putative	5.88469	1.42398	3.65434	1.86961	Tb927.11.3240	T-complex protein 1, zeta subunit, putative	2.7	4.3	3.47568	1.79729
														Tb927.9.8070	60S ribosomal protein L10, putative,QM-like protein	4.91255	2.39424	3.6534	1.86924	Tb927.9.8070	60S ribosomal protein L10, putative,QM-like protein	2.3	2.3	2.25356	1.17221
														Tb927.11.9920	polyubiquitin, putative	4.88308	2.28871	3.58589	1.84233	Tb927.11.9920	polyubiquitin, putative	5.4	6.7	6.05915	2.59911
														Tb927.10.1100	60S ribosomal protein L9, putative	4.81753	2.33091	3.57422	1.83763	Tb927.10.1100	60S ribosomal protein L9, putative	2.4	2.9	2.62529	1.39248
														Tb927.7.7410	oxidoreductase, putative	6.28767	0.587331	3.4375	1.78136	Tb927.7.7410	oxidoreductase, putative	1.4	7.9	4.65604	2.2191
														Tb927.7.2340	40S ribosomal protein S15, putative	5.53707	1.29699	3.41703	1.77274	Tb927.7.2340	40S ribosomal protein S15, putative	1.7	4.4	3.04841	1.60806
														Tb927.11.13360	AAA ATPase, putative	5.47594	1.3378	3.40687	1.76845	Tb927.11.13360	AAA ATPase, putative	1.2	3.1	2.15611	1.10843
														Tb927.7.4000	glutathione synthetase, putative	4.68054	2.11349	3.39702	1.76427	Tb927.7.4000	glutathione synthetase, putative	3.8	3.6	3.68586	1.882
														Tb11.0290	40S ribosomal protein S14, putative,chrXI additional, unordered contigs	4.3766	2.40479	3.3907	1.76158	Tb11.0290	40S ribosomal protein S14, putative,chrXI additional, unordered contigs	4.2	4.1	4.12674	2.045
														Tb927.10.3990	DHH1	5.05931	1.66192	3.36062	1.74873	Tb927.10.3990	DHH1	3.7	5	4.34214	2.11841
														Tb927.8.3150	t-complex protein 1 gamma subunit, putative	5.12794	1.58884	3.35839	1.74777	Tb927.8.3150	t-complex protein 1 gamma subunit, putative	1.9	2.8	2.33724	1.22481
														Tb927.1.2390	beta tubulin	5.73673	0.840953	3.28884	1.71758	Tb927.1.2390	beta tubulin	1.3	2.7	1.99909	0.999343
														Tb927.9.2650	hypothetical protein, conserved	3.96653	2.49717	3.23185	1.69236	Tb927.9.2650	hypothetical protein, conserved	2	1.1	1.58993	0.668962
														Tb927.11.2650	heat shock protein 84, putative	4.95653	1.50556	3.23105	1.692	Tb927.11.2650	heat shock protein 84, putative	1.9	7.3	4.58107	2.19568
														Tb927.8.1500	hypothetical protein, conserved	5.62195	0.802941	3.21244	1.68367	Tb927.8.1500	hypothetical protein, conserved	6.5	5.6	6.03787	2.59404
														Tb927.4.1270	ruvB-like DNA helicase, putative	5.58617	0.802637	3.1944	1.67555	Tb927.4.1270	ruvB-like DNA helicase, putative	2.5	5.3	3.91974	1.97076
														Tb927.9.7690	hypothetical protein, conserved	3.789	2.52087	3.15493	1.65761	Tb927.9.7690	hypothetical protein, conserved	4.5	3.4	3.98079	1.99306
														Tb927.9.4310	tricarboxylate carrier, putative	4.96626	1.32955	3.1479	1.65439	Tb927.9.4310	tricarboxylate carrier, putative	1.5	3.5	2.5224	1.3348
														Tb927.10.12030	hypothetical protein, conserved	4.09388	2.1789	3.13639	1.64911	Tb927.10.12030	hypothetical protein, conserved	1.4	1.8	1.60462	0.682229
														Tb927.11.15370	hypothetical protein, conserved	5.07676	1.1087	3.09273	1.62888	Tb927.11.15370	hypothetical protein, conserved	1.1	3.8	2.42258	1.27654
														Tb927.11.550	SCD6	3.50738	2.61002	3.0587	1.61292	Tb927.11.550	SCD6	4.7	3.1	3.85603	1.94712
														Tb927.10.13360	elongation factor Tu, putative	5.12436	0.834016	2.97919	1.57492	Tb927.10.13360	elongation factor Tu, putative	3.3	5	4.13746	2.04874
														Tb927.10.2290	chaperone protein DNAj, putative	4.35849	1.57857	2.96853	1.56975	Tb927.10.2290	chaperone protein DNAj, putative	0.7	2.6	1.64019	0.713859
														Tb927.11.6440	hypothetical protein, conserved	3.00647	2.88561	2.94604	1.55878	Tb927.11.6440	hypothetical protein, conserved	2.1	2.2	2.10521	1.07396
														Tb927.7.1040	40S ribosomal protein S16, putative	4.18194	1.62264	2.90229	1.53719	Tb927.7.1040	40S ribosomal protein S16, putative	3.9	4.2	4.05612	2.0201
														Tb11.0880	60S ribosomal protein L21e, putative,chrXI additional, unordered contigs	3.31057	2.45869	2.88463	1.52839	Tb11.0880	60S ribosomal protein L21e, putative,chrXI additional, unordered contigs	2.6	2.3	2.47039	1.30474
														Tb927.7.710	heat shock 70 kDa protein, putative	4.0591	1.64282	2.85096	1.51145	Tb927.7.710	heat shock 70 kDa protein, putative	2.5	4.6	3.5896	1.84382
														Tb927.10.6400	chaperonin Hsp60, mitochondrial precursor	4.44708	1.2535	2.85029	1.51111	Tb927.10.6400	chaperonin Hsp60, mitochondrial precursor	5.2	5.6	5.37139	2.42529
														Tb927.4.3790	ubiquitin carboxyl-terminal hydrolase, putative,cysteine peptidase, Clan CA, family C19, putative	4.54451	1.13312	2.83882	1.50529	Tb927.4.3790	ubiquitin carboxyl-terminal hydrolase, putative,cysteine peptidase, Clan CA, family C19, putative	1.8	1.1	1.44403	0.530097
														Tb927.2.2230	hypothetical protein, conserved	5.13713	0.535018	2.83607	1.5039	Tb927.2.2230	hypothetical protein, conserved	1.8	6.3	4.09017	2.03216
														Tb927.11.6660	hypothetical protein, conserved	2.3954	3.27437	2.83488	1.50329	Tb927.11.6660	hypothetical protein, conserved	2.3	6.2	4.284	2.09896
														Tb927.8.7100	acetyl-CoA carboxylase, putative	3.35335	2.31205	2.8327	1.50218	Tb927.8.7100	acetyl-CoA carboxylase, putative	2.1	1.7	1.90718	0.931441
														Tb927.9.8450	adenylate kinase	5.48121	0.13649	2.80885	1.48998	Tb927.9.8450	adenylate kinase	6.1	1	3.55542	1.83002
														Tb927.11.14590	hypothetical protein, conserved	3.99224	1.59903	2.79563	1.48318	Tb927.11.14590	hypothetical protein, conserved	3.1	2.7	2.85124	1.51159
														Tb927.8.1980	hypothetical protein, conserved	4.5339	1.01842	2.77616	1.47309	Tb927.8.1980	hypothetical protein, conserved	1	2.8	1.87248	0.904947
														Tb927.10.5770	valosin-containing protein homolog,Transitional endoplasmic reticulum ATPase, putative	4.2953	1.16517	2.73023	1.44902	Tb927.10.5770	valosin-containing protein homolog,Transitional endoplasmic reticulum ATPase, putative	1	3.5	2.24285	1.16533
														Tb927.9.4080	hypothetical protein, conserved	2.94917	2.46544	2.7073	1.43686	Tb927.9.4080	hypothetical protein, conserved	2.2	1.8	2.01629	1.0117
														Tb927.9.4680	eukaryotic initiation factor 4a, putative	4.07363	1.29093	2.68228	1.42346	Tb927.9.4680	eukaryotic initiation factor 4a, putative	2.6	5.7	4.19385	2.06828
														Tb927.7.5170	60S ribosomal protein L23a,60S ribosomal protein L25	2.91375	2.35537	2.63456	1.39756	Tb927.7.5170	60S ribosomal protein L23a,60S ribosomal protein L25	2.5	2.6	2.53824	1.34383
														Tb927.9.12300	replication factor C, subunit 3, putative	4.51151	0.690976	2.60124	1.3792	Tb927.9.12300	replication factor C, subunit 3, putative	2	4.6	3.33009	1.73556
														Tb927.8.3470	hypothetical protein, conserved	1.17065	4.03021	2.60043	1.37875	Tb927.8.3470	hypothetical protein, conserved	0.4	0.4	0.402052	-1.31455
														Tb927.10.15120	40S ribosomal protein S13, putative	2.65017	2.49661	2.57339	1.36367	Tb927.10.15120	40S ribosomal protein S13, putative	3.4	3	3.19173	1.67434
														Tb927.11.16130	nucleoside diphosphate kinase	3.37065	1.7758	2.57323	1.36358	Tb927.11.16130	nucleoside diphosphate kinase	3.4	3.1	3.27411	1.7111
														Tb927.11.11360	guanine nucleotide-binding protein beta subunit- like protein,activated protein kinase c receptor	2.58057	2.50353	2.54205	1.34599	Tb927.11.11360	guanine nucleotide-binding protein beta subunit- like protein,activated protein kinase c receptor	2.4	2.8	2.58764	1.37164
														Tb927.3.1350	hypothetical protein, conserved	4.29818	0.763239	2.53071	1.33954	Tb927.3.1350	hypothetical protein, conserved	0.3	1.8	1.06987	0.0974326
														Tb927.7.3700	hypothetical protein, conserved	3.27487	1.77618	2.52553	1.33658	Tb927.7.3700	hypothetical protein, conserved	3.4	4.4	3.93299	1.97563
														Tb927.11.900	isocitrate dehydrogenase, putative	4.00816	1.01314	2.51065	1.32806	Tb927.11.900	isocitrate dehydrogenase, putative	3	2.3	2.66109	1.41202
														Tb927.9.14370	60S ribosomal protein L26, putative	2.82853	2.18012	2.50432	1.32442	Tb927.9.14370	60S ribosomal protein L26, putative	3.1	2.6	2.87152	1.52182
														Tb927.1.2340	alpha tubulin	4.03723	0.878004	2.45762	1.29726	Tb927.1.2340	alpha tubulin	1.6	2.3	1.95456	0.966845
														Tb927.8.7470	hypothetical protein, conserved	3.05321	1.8291	2.44116	1.28756	Tb927.8.7470	hypothetical protein, conserved	1.1	1.3	1.1732	0.230446
														Tb927.3.5050	60S ribosomal protein L4	3.1573	1.70054	2.42892	1.28031	Tb927.3.5050	60S ribosomal protein L4	1.5	3.9	2.70483	1.43554
														Tb927.4.1860	ribosomal protein S19, putative	2.2342	2.55075	2.39248	1.25851	Tb927.4.1860	ribosomal protein S19, putative	1.8	2	1.88607	0.915381
														Tb927.10.12890	bifunctional aminoacyl-tRNA synthetase, putative	3.51922	1.22874	2.37398	1.24731	Tb927.10.12890	bifunctional aminoacyl-tRNA synthetase, putative	1.2	2.6	1.86183	0.896723
														Tb927.9.8850	actin A	3.78592	0.961494	2.37371	1.24714	Tb927.9.8850	actin A	1.9	4.4	3.15049	1.65558
														Tb927.7.3090	hypothetical protein, conserved	2.77818	1.95045	2.36432	1.24142	Tb927.7.3090	hypothetical protein, conserved	4.1	5.5	4.82298	2.26993
														Tb927.3.5370	hypothetical protein, conserved	3.24609	1.45833	2.35221	1.23402	Tb927.3.5370	hypothetical protein, conserved	5.2	6	5.58713	2.48211
														Tb927.11.1900	T-complex protein 1, beta subunit, putative	3.12026	1.57935	2.3498	1.23254	Tb927.11.1900	T-complex protein 1, beta subunit, putative	2.2	1.8	1.96612	0.975352
														Tb927.6.2640	importin alpha subunit, putative	3.8888	0.793286	2.34104	1.22715	Tb927.6.2640	importin alpha subunit, putative	2.2	4.7	3.46305	1.79204
														Tb927.1.670	hypothetical protein, conserved	3.65494	1.01105	2.333	1.22218	Tb927.1.670	hypothetical protein, conserved	2.9	2	2.48693	1.31437
														Tb927.1.1710	hypothetical protein, conserved	3.14813	1.51186	2.32999	1.22033	Tb927.1.1710	hypothetical protein, conserved	2.1	2.7	2.40905	1.26846
														Tb927.9.2730	hypothetical protein, conserved	4.21422	0.444821	2.32952	1.22003	Tb927.9.2730	hypothetical protein, conserved	2.5	1.8	2.17968	1.12412
														Tb927.9.11380	60S ribosomal protein L23, putative	2.865	1.79272	2.32886	1.21962	Tb927.9.11380	60S ribosomal protein L23, putative	3.3	2.5	2.89273	1.53243
														Tb927.11.6280	pyruvate phosphate dikinase	3.2705	1.37537	2.32294	1.21595	Tb927.11.6280	pyruvate phosphate dikinase	1.5	2.5	2.01199	1.00863
														Tb927.9.12510	ATP-dependent DEAD/H RNA helicase, putative	2.73672	1.84366	2.29019	1.19547	Tb927.9.12510	ATP-dependent DEAD/H RNA helicase, putative	1.8	1.4	1.61597	0.692405
														Tb927.4.3590	translation elongation factor 1-beta, putative	2.94692	1.58721	2.26707	1.18083	Tb927.4.3590	translation elongation factor 1-beta, putative	2.6	3.1	2.88697	1.52955
														Tb927.1.700	phosphoglycerate kinase	3.38103	1.13059	2.25581	1.17365	Tb927.1.700	phosphoglycerate kinase	3.5	7.6	5.56608	2.47666
														Tb927.6.600	Chromatin assembly factor 1	3.0479	1.41458	2.23124	1.15784	Tb927.6.600	Chromatin assembly factor 1	5.9	3.7	4.77688	2.25607
														Tb927.10.14700	hypothetical protein, conserved	3.11549	1.25585	2.18567	1.12808	Tb927.10.14700	hypothetical protein, conserved	1.5	1.8	1.67568	0.744744
														Tb927.6.3890	replication factor C, subunit 2, putative	3.94314	0.420586	2.18186	1.12556	Tb927.6.3890	replication factor C, subunit 2, putative	1.4	3.1	2.249	1.16928
														Tb927.9.12200	60S ribosomal subunit protein L31, putative	2.30618	2.01809	2.16213	1.11245	Tb927.9.12200	60S ribosomal subunit protein L31, putative	2.1	2	2.09364	1.06601
														Tb927.9.5900	glutamate dehydrogenase	3.26197	1.04348	2.15273	1.10616	Tb927.9.5900	glutamate dehydrogenase	2.3	4.1	3.23412	1.69337
														Tb927.4.4550	hypothetical protein, conserved	3.05442	1.22895	2.14168	1.09874	Tb927.4.4550	hypothetical protein, conserved	2.3	1.8	2.07759	1.05491
														Tb927.7.1100	hypothetical protein, conserved	2.24327	2.02703	2.13515	1.09434	Tb927.7.1100	hypothetical protein, conserved	1.6	1.2	1.3872	0.472178
														Tb927.10.190	40S ribosomal protein S6, putative	3.09204	1.1579	2.12497	1.08744	Tb927.10.190	40S ribosomal protein S6, putative	0.7	4.4	2.5684	1.36087
														Tb927.8.3750	nucleolar protein, putative	3.61277	0.577024	2.0949	1.06688	Tb927.8.3750	nucleolar protein, putative	0.5	1.8	1.13416	0.181619
														Tb927.10.3560	arginine N-methyltransferase, putative	1.75146	2.36431	2.05788	1.04116	Tb927.10.3560	arginine N-methyltransferase, putative	1.7	1.5	1.60603	0.6835
														Tb927.9.15360	40S ribosomal protein S6, putative	2.89723	1.19517	2.0462	1.03295	Tb927.9.15360	40S ribosomal protein S6, putative	0.7	2.8	1.7359	0.795687
														Tb927.1.2120	calpain, putative,cysteine peptidase, Clan CA, family C2, putative	2.01141	2.05552	2.03347	1.02394	Tb927.1.2120	calpain, putative,cysteine peptidase, Clan CA, family C2, putative	3.9	3.7	3.81802	1.93282
														Tb927.10.2240	hypothetical protein, conserved	3.13796	0.89814	2.01805	1.01296	Tb927.10.2240	hypothetical protein, conserved	1.2	1	1.10174	0.13979
														Tb927.10.12990	hypothetical protein, conserved,predicted ankyrin repeat family protein	2.92513	1.10675	2.01594	1.01145	Tb927.10.12990	hypothetical protein, conserved,predicted ankyrin repeat family protein	3.5	2.6	3.06973	1.61811
														Tb927.10.5330	40S ribosomal protein S18, putative	3.07622	0.835992	1.9561	0.967984	Tb927.10.5330	40S ribosomal protein S18, putative	2.5	2.4	2.45713	1.29697
														Tb927.10.230	proteasome alpha 5 subunit, putative,20S proteasome subunit alpha 5	1.70007	2.19185	1.94596	0.960481	Tb927.10.230	proteasome alpha 5 subunit, putative,20S proteasome subunit alpha 5	3.9	3.4	3.64548	1.86611
														Tb927.10.1560	hypothetical protein, conserved	3.0022	0.883554	1.94288	0.958193	Tb927.10.1560	hypothetical protein, conserved	0.3	1.8	1.05132	0.0722069
														Tb927.8.4820	hypothetical protein, conserved	3.278	0.607293	1.94264	0.958022	Tb927.8.4820	hypothetical protein, conserved	0.7	1.4	1.05612	0.0787681
														Tb927.11.10780	hypothetical protein, conserved	2.77598	1.09583	1.93591	0.95301	Tb927.11.10780	hypothetical protein, conserved	3.8	4.2	4.03176	2.01141
														Tb927.10.12500	P-type H -ATPase, putative	2.25067	1.52061	1.88564	0.915055	Tb927.10.12500	P-type H -ATPase, putative	2.5	1.7	2.11984	1.08395
														Tb927.11.1670	cysteine desulfurase, putative	2.83479	0.85389	1.84434	0.883103	Tb927.11.1670	cysteine desulfurase, putative	3.8	6.5	5.15495	2.36596
														Tb927.7.5000	60S ribosomal protein L19, putative	2.23356	1.44835	1.84096	0.880455	Tb927.7.5000	60S ribosomal protein L19, putative	1.2	1.5	1.37343	0.457779
														Tb927.3.1680	hypothetical protein, conserved	2.05131	1.51526	1.78328	0.834537	Tb927.3.1680	hypothetical protein, conserved	3.1	3.4	3.27912	1.71331
														Tb927.11.14220	hypothetical protein, conserved	2.72422	0.80333	1.76377	0.818667	Tb927.11.14220	hypothetical protein, conserved	6.8	4	5.35766	2.4216
														Tb927.3.3310	60S ribosomal protein L13, putative	1.79752	1.7261	1.76181	0.817057	Tb927.3.3310	60S ribosomal protein L13, putative	0.9	1.7	1.34773	0.430529
														Tb927.11.11820	40S ribosomal protein S17, putative	2.41035	1.09438	1.75236	0.809303	Tb927.11.11820	40S ribosomal protein S17, putative	1.4	1.4	1.3837	0.468529
														Tb927.1.710	phosphoglycerate kinase	2.96787	0.465796	1.71683	0.779751	Tb927.1.710	phosphoglycerate kinase	1.1	2.5	1.75535	0.81176
														Tb927.3.2100	hypothetical protein, conserved	2.23703	1.19321	1.71512	0.77831	Tb927.3.2100	hypothetical protein, conserved	2.2	3.5	2.82399	1.49773
														Tb927.9.11050	hypothetical protein, conserved	2.10284	1.26949	1.68617	0.753746	Tb927.9.11050	hypothetical protein, conserved	2.3	1.5	1.89231	0.920149
														Tb927.11.5850	RBP38	2.24855	1.11503	1.68179	0.749994	Tb927.11.5850	RNA-binding protein, putative	2.4	1.5	1.93271	0.950623
														Tb927.3.4750	aminopeptidase, putative,metallo-peptidase, Clan MA(E) Family M1	2.19002	1.15297	1.6715	0.741143	Tb927.3.4750	aminopeptidase, putative,metallo-peptidase, Clan MA(E) Family M1	0.9	2	1.46611	0.55199
														Tb927.9.13680	ADP-ribosylation factor, putative	2.33506	1.00538	1.67022	0.740036	Tb927.9.13680	ADP-ribosylation factor, putative	2.4	3.4	2.90746	1.53976
														Tb927.10.9780	ATP-dependent DEAD/H RNA helicase, putative,ATP- dependent RNA helicase, putative	2.40505	0.928013	1.66653	0.736849	Tb927.10.9780	ATP-dependent DEAD/H RNA helicase, putative,ATP- dependent RNA helicase, putative	0.8	1.1	0.967617	-0.0474914
														Tb927.8.3530	glycerol-3-phosphate dehydrogenase [NAD ], glycosomal	1.99481	1.30456	1.64969	0.722192	Tb927.8.3530	glycerol-3-phosphate dehydrogenase [NAD ], glycosomal	2	2.4	2.19887	1.13676
														Tb927.9.5190	proliferative cell nuclear antigen (PCNA), putative	1.92313	1.34215	1.63264	0.707206	Tb927.9.5190	proliferative cell nuclear antigen (PCNA), putative	1.6	2.7	2.14952	1.10402
														Tb927.10.7990	replication factor C, subunit 5, putative,ATPase, putative	2.84848	0.308136	1.57831	0.658378	Tb927.10.7990	replication factor C, subunit 5, putative,ATPase, putative	0.5	1.4	0.984717	-0.0222186
														Tb927.10.5460	60S ribosomal protein L24, putative	1.227	1.90638	1.56669	0.64772	Tb927.10.5460	60S ribosomal protein L24, putative	2.3	1.9	2.06724	1.04771
														Tb927.4.610	hypothetical protein, conserved	2.23701	0.877089	1.55705	0.638815	Tb927.4.610	hypothetical protein, conserved	0.7	0.8	0.757994	-0.399742
														Tb927.11.10990	translation initiation factor 2 subunit, putative	2.73516	0.344474	1.53982	0.622758	Tb927.11.10990	translation initiation factor 2 subunit, putative	3.1	3.4	3.24909	1.70004
														Tb927.7.4900	5'-3' exonuclease XRNA, putative,exoribonuclease 1, putative	1.83911	1.23811	1.53861	0.621626	Tb927.7.4900	5'-3' exonuclease XRNA, putative,exoribonuclease 1, putative	1.9	1.2	1.53263	0.616006
														Tb927.3.2440	serine/threonine-protein kinase, putative,protein kinase, putative	2.28332	0.793201	1.53826	0.6213	Tb927.3.2440	serine/threonine-protein kinase, putative,protein kinase, putative	1.6	1.8	1.69776	0.763629
														Tb927.11.9730	60S ribosomal protein L34, putative	1.32358	1.74661	1.53509	0.618326	Tb927.11.9730	60S ribosomal protein L34, putative	2.1	2	2.05339	1.03801
														Tb927.4.450	coatomer alpha subunit, putative	2.81493	0.24076	1.52785	0.6115	Tb927.4.450	coatomer alpha subunit, putative	1.1	2.8	1.96162	0.972045
														Tb927.11.6710	hypothetical protein, conserved,predicted tetratricopeptide repeat (TPR) protein	2.68822	0.35819	1.52321	0.607111	Tb927.11.6710	hypothetical protein, conserved,predicted tetratricopeptide repeat (TPR) protein	2.1	3.1	2.6094	1.38372
														Tb927.10.14150	hypothetical protein, conserved	1.87707	1.14225	1.50966	0.594224	Tb927.10.14150	hypothetical protein, conserved	1.4	0.8	1.11181	0.15291
														Tb927.11.7460	glucose-regulated protein 78, putative,luminal binding protein 1 (BiP), putative	2.18642	0.827619	1.50702	0.5917	Tb927.11.7460	glucose-regulated protein 78, putative,luminal binding protein 1 (BiP), putative	0.6	1.6	1.10978	0.150276
														Tb927.10.560	40S ribosomal proteins S11, putative	1.87629	1.06585	1.47107	0.556866	Tb927.10.560	40S ribosomal proteins S11, putative	1.9	1.5	1.69334	0.759872
														Tb927.11.14020	NRBD2	1.68266	1.24088	1.46177	0.547716	Tb927.11.14020	RNA-binding protein	1.8	2.1	1.93441	0.951893
														Tb927.1.3260	hypothetical protein, conserved	2.06021	0.857004	1.45861	0.544589	Tb927.1.3260	hypothetical protein, conserved	4.8	5.1	4.92743	2.30084
														Tb927.10.70	retrotransposon hot spot (RHS), putative, (fragment)	1.63636	1.25631	1.44633	0.5324	Tb927.10.70		1.3	1.7	1.48238	0.567917
														Tb927.5.1140	choline/ethanolamine kinase, putative	2.00955	0.875929	1.44274	0.528813	Tb927.5.1140	choline/ethanolamine kinase, putative	1.8	2.3	2.07058	1.05004
														Tb927.11.9640	glycyl-tRNA synthetase, putative	2.06068	0.823721	1.4422	0.528274	Tb927.11.9640	glycyl-tRNA synthetase, putative	1.3	6.6	3.98681	1.99523
														Tb927.2.2970	mitochondrial carrier protein, putative	2.59342	0.288153	1.44079	0.526859	Tb927.2.2970	mitochondrial carrier protein, putative	0.9	3.5	2.19538	1.13447
														Tb927.4.2180	60S ribosomal protein L35a, putative	1.50049	1.36908	1.43478	0.520834	Tb927.4.2180	60S ribosomal protein L35a, putative	0.8	2.5	1.64152	0.715036
														Tb927.2.1170	retrotransposon hot spot (RHS) protein, putative,retrotransposon hot spot protein 5 (RHS5), putative	1.79265	1.06981	1.43123	0.517256	Tb927.2.1170	retrotransposon hot spot (RHS) protein, putative,retrotransposon hot spot protein 5 (RHS5), putative	2	1.9	1.94157	0.957224
														Tb927.10.15520	signal recognition particle protein, putative	2.32188	0.524469	1.42317	0.509112	Tb927.10.15520	signal recognition particle protein, putative	1.3	1.8	1.51631	0.600567
														Tb927.10.1540	hypothetical protein, conserved,zinc finger protein family member, putative	1.64844	1.17682	1.41263	0.49838	Tb927.10.1540	hypothetical protein, conserved,zinc finger protein family member, putative	0.5	0.4	0.435295	-1.19993
														Tb927.11.630	RNA polymerase I second largest subunit	1.52695	1.25535	1.39115	0.476282	Tb927.11.630	RNA polymerase I second largest subunit	1.4	1.7	1.55624	0.638069
														Tb927.5.2090	kinesin, putative	0.74829	2.01714	1.38272	0.467504	Tb927.5.2090	kinesin, putative	2.2	3.6	2.90478	1.53843
														Tb927.8.4500	hypothetical protein, conserved	2.54932	0.214946	1.38213	0.466898	Tb927.8.4500	hypothetical protein, conserved	0.9	1.6	1.27361	0.348918
														Tb927.11.9720	40S ribosomal protein S27, putative	1.98649	0.769404	1.37795	0.462521	Tb927.11.9720	40S ribosomal protein S27, putative	1.9	2.7	2.30693	1.20597
														Tb927.10.15310	hypothetical protein, conserved	1.32846	1.42325	1.37586	0.460329	Tb927.10.15310	hypothetical protein, conserved	1.3	1.1	1.21511	0.281085
														Tb927.10.14870	hypothetical protein, conserved	1.87596	0.845108	1.36053	0.444174	Tb927.10.14870	hypothetical protein, conserved	1.1	1.2	1.15072	0.202537
														Tb927.10.4110	60S ribosomal protein L30	1.91384	0.767367	1.3406	0.422881	Tb927.10.4110	60S ribosomal protein L30	2	3.1	2.53676	1.34299
														Tb927.6.1880	aspartyl-tRNA synthetase, putative	2.28984	0.366179	1.32801	0.409266	Tb927.6.1880	aspartyl-tRNA synthetase, putative	0.9	2.4	1.65117	0.723488
														Tb927.11.4820	60S ribosomal protein L17, putative	1.32173	1.32505	1.32339	0.404236	Tb927.11.4820	60S ribosomal protein L17, putative	1.8	1.5	1.68749	0.754879
														Tb927.10.14180	protein transport protein Sec13, putative,cytosolic coat protein, putative	1.98935	0.652765	1.32106	0.401695	Tb927.10.14180	protein transport protein Sec13, putative,cytosolic coat protein, putative	2.3	2.1	2.20642	1.14171
														Tb927.8.6150	40S ribosomal protein S8, putative	1.17462	1.45349	1.31405	0.394024	Tb927.8.6150	40S ribosomal protein S8, putative	1.1	1.5	1.26175	0.335423
														Tb927.11.13090	elongation factor 1 gamma, putative	1.5761	1.01198	1.29404	0.371879	Tb927.11.13090	elongation factor 1 gamma, putative	2.9	2.3	2.61468	1.38663
														Tb927.1.3200	phosphatase-like protein, putative	1.83455	0.717464	1.27601	0.351639	Tb927.1.3200	phosphatase-like protein, putative	6.9	3	4.93213	2.30221
														Tb927.3.5340	Hsc70-interacting protein (Hip), putative	1.66034	0.877159	1.26875	0.343405	Tb927.3.5340	Hsc70-interacting protein (Hip), putative	3.8	3.2	3.52455	1.81744
														Tb927.7.3180	Mu-adaptin 1, putative,adaptor complex AP-1 medium subunit, putative	1.87149	0.627523	1.24951	0.321359	Tb927.7.3180	Mu-adaptin 1, putative,adaptor complex AP-1 medium subunit, putative	1.4	2.5	1.94357	0.95871
														Tb927.7.4680	hypothetical protein, conserved	1.17445	1.27224	1.22334	0.29083	Tb927.7.4680	hypothetical protein, conserved	3.8	2.6	3.17789	1.66807
														Tb927.10.2890	enolase	1.87526	0.532548	1.2039	0.267719	Tb927.10.2890	enolase	1.4	3.1	2.25559	1.1735
														Tb927.4.2630	ATP-dependent DEAD/H RNA helicase, putative	2.00941	0.398073	1.20374	0.267526	Tb927.4.2630	ATP-dependent DEAD/H RNA helicase, putative	0.6	1.2	0.885836	-0.174888
														Tb927.11.15880	60S ribosomal protein L27, putative	1.50956	0.89527	1.20242	0.265937	Tb927.11.15880	60S ribosomal protein L27, putative	1.7	1.3	1.50273	0.587586
														Tb927.9.7550	adenylosuccinate lyase, putative	1.9098	0.464383	1.18709	0.247434	Tb927.9.7550	adenylosuccinate lyase, putative	1.2	1.3	1.25588	0.328698
														Tb927.10.3940	40S ribosomal protein S3A, putative	1.38241	0.972008	1.17721	0.235371	Tb927.10.3940	40S ribosomal protein S3A, putative	1.5	1.5	1.50782	0.59246
														Tb927.10.1500	methionyl-tRNA synthetase, putative	1.49074	0.854788	1.17276	0.229911	Tb927.10.1500	methionyl-tRNA synthetase, putative	1	0.6	0.789608	-0.340792
														Tb927.8.5090	DNA-directed RNA polymerase I largest subunit	1.59389	0.74518	1.16953	0.225933	Tb927.8.5090	DNA-directed RNA polymerase I largest subunit	1.5	1.8	1.65765	0.729139
														Tb927.10.12620	hypothetical protein, conserved	1.92281	0.394781	1.15879	0.212624	Tb927.10.12620	hypothetical protein, conserved	0.9	0.8	0.867998	-0.204236
														Tb927.4.1330	DNA topoisomerase IB, large subunit	1.10256	1.18631	1.14443	0.194634	Tb927.4.1330	DNA topoisomerase IB, large subunit	2.2	2.1	2.11658	1.08174
														Tb927.4.5350	3-methylcrotonyl-CoA carboxylase, pseudogene, putative,3-methylcrotonyl-CoA carboxylase, point mutation	1.13062	1.15385	1.14223	0.191857	Tb927.4.5350	is_pseudo=true 3-methylcrotonyl-CoA carboxylase, pseudogene, putative,3-methylcrotonyl-CoA carboxylase, point mutation	1	0.8	0.856244	-0.223906
														Tb927.8.1510	ATP-dependent DEAD/H RNA helicase, putative	1.52226	0.733754	1.12801	0.173779	Tb927.8.1510	ATP-dependent DEAD/H RNA helicase, putative	0.6	1.4	1.00119	0.00171758
														Tb927.10.10140	paraflagellar rod component, putative	1.88184	0.373528	1.12768	0.17336	Tb927.10.10140	paraflagellar rod component, putative	0.7	1.3	1.03551	0.0503365
														Tb927.9.13610	helicase, putative	1.58655	0.662282	1.12442	0.169177	Tb927.9.13610	helicase, putative	2.2	1.5	1.84296	0.882021
														Tb927.11.6160	eukaryotic release factor 3, putative	1.32848	0.885517	1.107	0.146653	Tb927.11.6160	eukaryotic release factor 3, putative	1.5	1	1.21252	0.27801
														Tb927.8.6970	3-methylcrotonyl-CoA carboxylase alpha subunit, putative	0.895232	1.29423	1.09473	0.130575	Tb927.8.6970	3-methylcrotonyl-CoA carboxylase alpha subunit, putative	1.1	0.8	0.94716	-0.0783197
														Tb927.11.16810	dynein light intermediate chain D1bLIC, putative	1.83368	0.35329	1.09348	0.128933	Tb927.11.16810	dynein light intermediate chain D1bLIC, putative	2.2	1.9	2.06047	1.04297
														Tb927.3.5530	Tb-292 membrane associated protein	0.955529	1.21932	1.08742	0.120914	Tb927.3.5530	Tb-292 membrane associated protein	2.5	2.2	2.35771	1.23738
														Tb927.5.600	hypothetical protein, conserved	0.506013	1.66458	1.0853	0.118089	Tb927.5.600	hypothetical protein, conserved	3	2.6	2.82055	1.49598
														Tb927.2.5160	chaperone protein DNAj, putative	1.29363	0.824877	1.05925	0.0830499	Tb927.2.5160	chaperone protein DNAj, putative	1.2	2	1.60904	0.686204
														Tb927.6.950	cysteinyl-tRNA synthetase, putative	1.20354	0.8309	1.01722	0.02463	Tb927.6.950	cysteinyl-tRNA synthetase, putative	1.4	1.9	1.63583	0.710023
														Tb927.10.8190	T-complex protein 1, theta subunit, putative,CCT-theta, putative	1.55375	0.475447	1.0146	0.0209095	Tb927.10.8190	T-complex protein 1, theta subunit, putative,CCT-theta, putative	1.3	1.6	1.43872	0.524788
														Tb927.11.3490	hypothetical protein, conserved	1.53347	0.489294	1.01138	0.0163293	Tb927.11.3490	hypothetical protein, conserved	1.5	1.4	1.4541	0.540126
														Tb927.11.17000	hypothetical protein, conserved,leucine-rich repeat protein (LRRP), putative	1.35698	0.651719	1.00435	0.00625833	Tb927.11.17000	hypothetical protein, conserved,leucine-rich repeat protein (LRRP), putative	1.1	1.3	1.22596	0.293913
														Tb927.8.820	hypothetical protein, conserved	1.34563	0.662841	1.00424	0.00609733	Tb927.8.820	hypothetical protein, conserved	1.1	0.9	0.984654	-0.0223118
														Tb927.11.9550	replication factor C, subunit 4, putative	1.85879	0.140111	0.999449	-0.000795505	Tb927.11.9550	replication factor C, subunit 4, putative	0.8	1.1	0.987536	-0.0180951
														Tb927.5.2320	hypothetical protein, conserved	1.65581	0.335952	0.99588	-0.00595635	Tb927.5.2320	hypothetical protein, conserved	0.8	1.3	1.02781	0.0395732
														Tb927.11.2280	hypothetical protein, conserved	1.34056	0.644131	0.992347	-0.0110837	Tb927.11.2280	hypothetical protein, conserved	1.4	1.1	1.28214	0.358551
														Tb927.5.2960	phosphoribosylpyrophosphate synthetase, putative	1.57047	0.400749	0.985611	-0.020909	Tb927.5.2960	phosphoribosylpyrophosphate synthetase, putative	2.2	3.4	2.7972	1.48398
														Tb927.4.3890	ATP-dependent RNA helicase, putative	1.48105	0.444013	0.962532	-0.055093	Tb927.4.3890	ATP-dependent RNA helicase, putative	0.6	0.7	0.623617	-0.681268
														Tb927.10.8040	adaptin complex 1 subunit, putative,beta-adaptin, fragment	1.52891	0.36672	0.947816	-0.0773209	Tb927.10.8040	adaptin complex 1 subunit, putative,beta-adaptin, fragment	2.3	2.3	2.27086	1.18324
														Tb927.9.10100	hypothetical protein, conserved	1.39227	0.497209	0.944739	-0.0820123	Tb927.9.10100	hypothetical protein, conserved	1.1	1.9	1.51147	0.595949
														Tb927.6.2360	adenosine kinase, putative	1.40849	0.471346	0.939918	-0.0893928	Tb927.6.2360	adenosine kinase, putative	1.3	1.9	1.62587	0.70121
														Tb927.9.5750	tryparedoxin peroxidase	0.843917	1.03554	0.93973	-0.0896813	Tb927.9.5750	tryparedoxin peroxidase	0.7	0.6	0.642063	-0.639213
														Tb927.4.1840	zinc carboxypeptidase, putative,metallo-peptidase, Clan MC, Family M14	0.672022	1.20272	0.937373	-0.0933049	Tb927.4.1840	zinc carboxypeptidase, putative,metallo-peptidase, Clan MC, Family M14	1.1	1.7	1.40368	0.48921
														Tb927.2.5130	hypothetical protein, conserved	1.7096	0.151635	0.930619	-0.103738	Tb927.2.5130	hypothetical protein, conserved	0.4	1	0.689845	-0.535655
														Tb927.9.5520	ubiquitin carboxyl-terminal hydrolase, putative,cysteine peptidase, Clan CA, family C19, putative	0.961317	0.873407	0.917362	-0.124437	Tb927.9.5520	ubiquitin carboxyl-terminal hydrolase, putative,cysteine peptidase, Clan CA, family C19, putative	3.6	2.5	3.05447	1.61092
														Tb927.9.15150	60S ribosomal protein L5, putative	1.03678	0.749164	0.89297	-0.163317	Tb927.9.15150	60S ribosomal protein L5, putative	0.5	0.6	0.549977	-0.862557
														Tb927.9.14120	hypothetical protein, conserved	0.992429	0.778746	0.885587	-0.175293	Tb927.9.14120	hypothetical protein, conserved	0.2	0.2	0.18003	-2.47369
														Tb927.9.11270	T-complex protein 1, eta subunit, putative,t- complex protein 1 (eta subunit), putative	1.31652	0.45206	0.884289	-0.17741	Tb927.9.11270	T-complex protein 1, eta subunit, putative,t- complex protein 1 (eta subunit), putative	0.9	1.2	1.07074	0.0986052
														Tb927.11.11850	splicing factor 3B subunit 1, putative	1.3754	0.388532	0.881967	-0.181203	Tb927.11.11850	splicing factor 3B subunit 1, putative	0.6	0.9	0.709317	-0.495497
														Tb927.11.1990	arginyl-tRNA synthetase, putative	1.13326	0.629863	0.881559	-0.181871	Tb927.11.1990	arginyl-tRNA synthetase, putative	1.2	1.1	1.18937	0.250192
														Tb927.10.1060	T-complex protein 1, delta subunit, putative	1.22046	0.537741	0.8791	-0.185901	Tb927.10.1060	T-complex protein 1, delta subunit, putative	1.1	1.5	1.34851	0.431369
														Tb927.5.2570	translation initiation factor, putative	1.07108	0.680987	0.876031	-0.190945	Tb927.5.2570	translation initiation factor, putative	1.5	1.1	1.30173	0.380433
														Tb927.3.1920	NOT5 protein	1.24114	0.501979	0.871561	-0.198326	Tb927.3.1920	NOT5 protein	1.8	1.4	1.62392	0.699479
														Tb927.10.8960	hypothetical protein, conserved	0.899607	0.840672	0.870139	-0.200681	Tb927.10.8960	hypothetical protein, conserved	1.4	1.5	1.46235	0.548293
														Tb927.7.4500	hypothetical protein, conserved	1.07772	0.65601	0.866865	-0.206121	Tb927.7.4500	hypothetical protein, conserved	2.2	1.6	1.88336	0.913312
														Tb927.10.12710	heat shock protein, putative	1.0551	0.66231	0.858706	-0.219763	Tb927.10.12710	heat shock protein, putative	1.5	1.7	1.61469	0.691262
														Tb927.7.2720	hypothetical protein, conserved	1.28262	0.402465	0.842541	-0.247182	Tb927.7.2720	hypothetical protein, conserved	0.6	1	0.781168	-0.356296
														Tb927.3.1970	hypothetical protein, conserved	1.2502	0.400752	0.825478	-0.276699	Tb927.3.1970	hypothetical protein, conserved	1.5	129.2	65.3429	6.02996
														Tb927.9.9210	60S ribosomal protein L37, putative	0.408855	1.23793	0.823393	-0.280347	Tb927.9.9210	60S ribosomal protein L37, putative	1	1.1	1.07319	0.101907
														Tb927.5.3250	hypothetical protein, conserved	0.856191	0.782921	0.819556	-0.287086	Tb927.5.3250	hypothetical protein, conserved	2.3	2.1	2.19692	1.13548
														Tb927.10.5030	ubiquitin/ribosomal protein S27a, putative	1.107	0.521635	0.814319	-0.296334	Tb927.10.5030	ubiquitin/ribosomal protein S27a, putative	0.8	1.3	1.07112	0.0991197
														Tb927.6.4000	hypothetical protein, conserved	0.679096	0.938097	0.808597	-0.306508	Tb927.6.4000	hypothetical protein, conserved	2.4	2.7	2.57987	1.3673
														Tb927.9.14470	ubiquitin carboxyl-terminal hydrolase, putative,cysteine peptidase, Clan CA, family C19, putative	0.911258	0.658508	0.784883	-0.349451	Tb927.9.14470	ubiquitin carboxyl-terminal hydrolase, putative,cysteine peptidase, Clan CA, family C19, putative	3.3	2.5	2.87514	1.52363
														Tb927.11.1890	hypothetical protein, conserved	0.901225	0.644482	0.772853	-0.371733	Tb927.11.1890	hypothetical protein, conserved	1.2	0.9	1.08734	0.120801
														Tb927.8.1270	hypothetical protein, conserved	1.00115	0.521824	0.761489	-0.393106	Tb927.8.1270	hypothetical protein, conserved	0.4	1	0.713109	-0.487806
														Tb927.9.1810	60S ribosomal protein L35, putative	0.654135	0.865793	0.759964	-0.395997	Tb927.9.1810	60S ribosomal protein L35, putative	0.6	0.4	0.528063	-0.921217
														Tb927.10.14810	hypothetical protein, conserved	1.17415	0.335148	0.75465	-0.40612	Tb927.10.14810	hypothetical protein, conserved	0.7	0.5	0.591917	-0.756534
														Tb927.11.13250	eukaryotic translation initiation factor 2 gamma, putative	1.03808	0.439281	0.738683	-0.436973	Tb927.11.13250	eukaryotic translation initiation factor 2 gamma, putative	0.4	0.8	0.604419	-0.726379
														Tb927.8.5290	hypothetical protein, conserved	1.15644	0.290526	0.723481	-0.466974	Tb927.8.5290	hypothetical protein, conserved	2	1.2	1.58867	0.667821
														Tb927.4.960	hypothetical protein, conserved	1.30175	0.145165	0.723457	-0.46702	Tb927.4.960	hypothetical protein, conserved	0.6	0.7	0.639479	-0.645031
														Tb927.11.11290	heat shock protein 70, putative	0.895037	0.537374	0.716206	-0.481554	Tb927.11.11290	heat shock protein 70, putative	2.3	1.4	1.86842	0.901816
														Tb927.8.4540	hypothetical protein, conserved	0.864549	0.555338	0.709944	-0.494223	Tb927.8.4540	hypothetical protein, conserved	1.2	0.9	1.04422	0.0624206
														Tb927.7.5560	glucosamine-fructose-6-phosphate aminotransferase, putative	1.16654	0.251539	0.709039	-0.496064	Tb927.7.5560	glucosamine-fructose-6-phosphate aminotransferase, putative	0.5	0.9	0.675092	-0.566843
														Tb927.11.11330	heat shock protein 70	0.830524	0.578251	0.704387	-0.505559	Tb927.11.11330	heat shock protein 70	1.6	1	1.28095	0.357211
														Tb927.11.11770	eukaryotic translation initiation factor 4e, putative	0.864236	0.536979	0.700607	-0.513322	Tb927.11.11770	eukaryotic translation initiation factor 4e, putative	0.8	0.6	0.688989	-0.537448
														Tb927.5.1460	hypothetical protein, conserved	0.673927	0.706106	0.690016	-0.535297	Tb927.5.1460	hypothetical protein, conserved	2.4	1.2	1.7966	0.845269
														Tb927.9.13920	kinetoplastid membrane protein KMP-11	1.12063	0.253756	0.68719	-0.541218	Tb927.9.13920	kinetoplastid membrane protein KMP-11	1.2	0.8	0.983576	-0.0238909
														Tb927.10.1080	40S ribosomal protein S23, putative	0.825386	0.543905	0.684645	-0.546571	Tb927.10.1080	40S ribosomal protein S23, putative	1.3	0.8	1.06082	0.08518
														Tb927.10.9570	paraflagellar rod component, putative	0.92893	0.432296	0.680613	-0.555093	Tb927.10.9570	paraflagellar rod component, putative	3.2	2.3	2.75825	1.46375
														Tb927.6.630	hypothetical protein, conserved	1.07554	0.252402	0.663969	-0.590812	Tb927.6.630	hypothetical protein, conserved	0.3	0.5	0.410209	-1.28557
														Tb927.11.4610	protein kinase A regulatory subunit	0.966061	0.355997	0.661029	-0.597215	Tb927.11.4610	protein kinase A regulatory subunit	1.4	1.3	1.3321	0.413704
														Tb927.10.1210	katanin, putative	0.943098	0.362954	0.653026	-0.614788	Tb927.10.1210	katanin, putative	1.4	1.1	1.2419	0.312545
														Tb927.9.9450	ZC3H28	1.04984	0.250815	0.650329	-0.620759	Tb927.9.9450	hypothetical protein, conserved,zinc finger protein family member, putative	0.8	0.6	0.730748	-0.452554
														Tb927.11.8970	ribose 5-phosphate isomerase, putative	0.824056	0.473403	0.648729	-0.624312	Tb927.11.8970	ribose 5-phosphate isomerase, putative	3.1	2.5	2.8022	1.48656
														Tb927.11.10560	eukaryotic translation initation factor 4 gamma	1.00241	0.288978	0.645693	-0.631079	Tb927.11.10560	hypothetical protein, conserved	0.7	0.8	0.752294	-0.410632
														Tb927.7.1110	asparagine synthetase a, putative	0.678009	0.608072	0.643041	-0.637018	Tb927.7.1110	asparagine synthetase a, putative	1.6	1.1	1.36533	0.449252
														Tb927.11.980	Nucleoporin	0.799636	0.476274	0.637955	-0.648474	Tb927.11.980	Nucleoporin	1.3	1.1	1.20603	0.270269
														Tb927.8.5260	60S ribosomal protein L39, putative	0.263879	1.00827	0.636077	-0.652726	Tb927.8.5260	60S ribosomal protein L39, putative	0.8	0.5	0.638913	-0.646309
														Tb927.6.400	peptidase M20/M25/M40, putative	0.809607	0.435947	0.622777	-0.683212	Tb927.6.400	peptidase M20/M25/M40, putative	0.8	0.6	0.673856	-0.569489
														Tb927.7.4290	hypothetical protein, conserved	0.59368	0.646984	0.620332	-0.688888	Tb927.7.4290	hypothetical protein, conserved	1.9	1.3	1.58493	0.664421
														Tb927.7.6090	hypothetical protein, conserved	0.764899	0.473741	0.61932	-0.691242	Tb927.7.6090	hypothetical protein, conserved	1	0.7	0.835843	-0.258696
														Tb927.7.5970	hypothetical protein, conserved	0.476643	0.741821	0.609232	-0.714936	Tb927.7.5970	hypothetical protein, conserved	0.7	1.3	0.964594	-0.0520059
														Tb927.11.2300	eukaryotic peptide chain release factor subunit 1, putative	0.856034	0.355428	0.605731	-0.723251	Tb927.11.2300	eukaryotic peptide chain release factor subunit 1, putative	0.8	0.7	0.710183	-0.493738
														Tb927.9.15210	ribosomal protein L36, putative	0.581456	0.616865	0.599161	-0.738985	Tb927.9.15210	ribosomal protein L36, putative	1	0.9	0.935618	-0.0960089
														Tb927.3.760	hypothetical protein, conserved	0.720596	0.457366	0.588981	-0.763706	Tb927.3.760	hypothetical protein, conserved	0.7	0.5	0.591359	-0.757893
														Tb927.11.6180	60S ribosomal protein L28, putative	0.560178	0.611689	0.585934	-0.771191	Tb927.11.6180	60S ribosomal protein L28, putative	0.9	0.6	0.767635	-0.381508
														Tb927.7.5210	hypothetical protein, conserved	0.530296	0.634988	0.582642	-0.779318	Tb927.7.5210	hypothetical protein, conserved	1.7	1.3	1.48042	0.566008
														Tb927.11.16760	T-complex protein 1, alpha subunit, putative	0.955196	0.20232	0.578758	-0.788968	Tb927.11.16760	T-complex protein 1, alpha subunit, putative	1	1.1	1.07619	0.105931
														Tb927.7.3170	hypothetical protein, conserved	0.737602	0.412673	0.575137	-0.798022	Tb927.7.3170	hypothetical protein, conserved	1.4	0.9	1.14601	0.196624
														Tb927.4.3410	selenoprotein, putative	0.977248	0.166948	0.572098	-0.805665	Tb927.4.3410	selenoprotein, putative	0.2	0.4	0.276895	-1.85259
														Tb927.10.15180	nucleosome assembly protein, putative	0.766287	0.376301	0.571294	-0.807694	Tb927.10.15180	nucleosome assembly protein, putative	0.2	0.6	0.389563	-1.36007
														Tb927.7.7070	hypothetical protein, conserved	0.520182	0.618137	0.569159	-0.813096	Tb927.7.7070	hypothetical protein, conserved	1	0.8	0.88313	-0.179303
														Tb927.3.1620	hypothetical protein, conserved	0.71591	0.418326	0.567118	-0.81828	Tb927.3.1620	hypothetical protein, conserved	1.8	1.6	1.70211	0.767325
														Tb927.11.13780	profilin	1.04907	0.0849338	0.567002	-0.818574	Tb927.11.13780	profilin	1	0.7	0.842371	-0.247473
														Tb927.11.3730	leucyl-tRNA synthetase, putative	0.638094	0.488594	0.563344	-0.827911	Tb927.11.3730	leucyl-tRNA synthetase, putative	1.1	0.9	1.02556	0.036413
														Tb927.11.13790	hypothetical protein, conserved	0.434518	0.667792	0.551155	-0.85947	Tb927.11.13790	hypothetical protein, conserved	1.3	1	1.12794	0.17369
														Tb927.7.4970	glutamine synthetase, putative	0.80304	0.298926	0.550983	-0.85992	Tb927.7.4970	glutamine synthetase, putative	0.8	0.8	0.772576	-0.372251
														Tb927.9.2590	hypothetical protein, conserved	0.8297	0.265636	0.547668	-0.868627	Tb927.9.2590	hypothetical protein, conserved	0.8	1.2	0.991151	-0.0128229
														Tb927.11.2370	hypothetical protein, conserved	0.616112	0.469898	0.543005	-0.880963	Tb927.11.2370	hypothetical protein, conserved	0.2	0.2	0.225851	-2.14656
														Tb927.6.2880	kinesin, putative	0.593689	0.478307	0.535998	-0.8997	Tb927.6.2880	kinesin, putative	1.6	1.3	1.44542	0.531489
														Tb927.3.2600	ATP-dependent DEAD/H RNA helicase, putative	0.686896	0.374187	0.530542	-0.914462	Tb927.3.2600	ATP-dependent DEAD/H RNA helicase, putative	0.7	0.6	0.681315	-0.553607
														Tb927.10.2690	hypothetical protein, conserved	0.408938	0.637871	0.523404	-0.934003	Tb927.10.2690	hypothetical protein, conserved	2.1	1.4	1.75208	0.809067
														Tb927.11.11460	hypothetical protein, conserved	0.694421	0.336589	0.515505	-0.955942	Tb927.11.11460	hypothetical protein, conserved	1.2	0.8	0.993064	-0.0100421
														Tb927.3.3450	ADP-ribosylation factor-like protein 3A, putative	0.596763	0.433556	0.51516	-0.956908	Tb927.3.3450	ADP-ribosylation factor-like protein 3A, putative	0.8	0.7	0.77187	-0.373571
														Tb927.11.8200	ribosomal protein s26, putative	0.562984	0.464036	0.51351	-0.961535	Tb927.11.8200	ribosomal protein s26, putative	1.1	1	1.07455	0.103733
														Tb927.11.16050	hypothetical protein, conserved	0.798438	0.209716	0.504077	-0.988285	Tb927.11.16050	hypothetical protein, conserved	0.9	0.9	0.908119	-0.139047
														Tb927.4.1540	hypothetical protein, conserved	0.72901	0.278373	0.503692	-0.989387	Tb927.4.1540	hypothetical protein, conserved	1.3	2	1.64211	0.715553
														Tb927.10.5930	protein kinase, putative	0.659705	0.338494	0.499099	-1.0026	Tb927.10.5930	protein kinase, putative	0.5	0.6	0.552566	-0.855781
														Tb927.9.13350	hypothetical protein, conserved	0.827195	0.170867	0.499031	-1.0028	Tb927.9.13350	hypothetical protein, conserved	0.2	0.9	0.558013	-0.84163
														Tb927.10.3660	aspartate aminotransferase	0.692877	0.257926	0.475401	-1.07278	Tb927.10.3660	aspartate aminotransferase	1.9	2	1.96838	0.97701
														Tb927.7.3980	immunodominant antigen, putative,tc40 antigen-like	0.656769	0.289917	0.473343	-1.07904	Tb927.7.3980	immunodominant antigen, putative,tc40 antigen-like	0.6	0.4	0.516737	-0.952497
														Tb927.4.920	hypothetical protein, conserved	0.530545	0.405237	0.467891	-1.09576	Tb927.4.920	hypothetical protein, conserved	1.2	0.8	1.00326	0.00470001
														Tb927.9.15420	60S ribosomal protein L32	0.285645	0.641227	0.463436	-1.10956	Tb927.9.15420	60S ribosomal protein L32	1.1	1	1.0481	0.0677697
														Tb927.11.4910	hypothetical protein, conserved,predicted ankyrin repeat family protein	0.542338	0.37893	0.460634	-1.11831	Tb927.11.4910	hypothetical protein, conserved,predicted ankyrin repeat family protein	1.3	0.8	1.04583	0.0646451
														Tb927.10.14890	C-terminal motor kinesin, putative	0.700168	0.209154	0.454661	-1.13714	Tb927.10.14890	C-terminal motor kinesin, putative	1.6	1.1	1.34975	0.432694
														Tb927.10.14890	hypothetical protein, conserved	0.771646	0.12885	0.450248	-1.15121	Tb927.10.14890	C-terminal motor kinesin, putative	1.6	1.1	1.34975	0.432694
														Tb927.10.6630	ATP-dependent DEAD/H RNA helicase HEL64, putative	0.662372	0.226707	0.44454	-1.16962	Tb927.10.6630	ATP-dependent DEAD/H RNA helicase HEL64, putative	0.1	0.3	0.197227	-2.34207
														Tb927.11.12440	hypothetical protein, conserved	0.519584	0.368666	0.444125	-1.17096	Tb927.11.12440	hypothetical protein, conserved	1.4	1	1.21921	0.285941
														Tb927.4.310	hypothetical protein, conserved	0.638674	0.246255	0.442464	-1.17637	Tb927.4.310	hypothetical protein, conserved	1.4	1.3	1.37808	0.46266
														Tb927.4.2940	hypothetical protein, conserved	0.376595	0.507232	0.441913	-1.17816	Tb927.4.2940	hypothetical protein, conserved	1.7	1.3	1.4873	0.572698
														Tb927.9.8050	hypothetical protein, conserved	0.592586	0.283365	0.437975	-1.19108	Tb927.9.8050	hypothetical protein, conserved	0.8	0.9	0.869027	-0.202527
														Tb927.11.9910	hypothetical protein, conserved	0.482213	0.388133	0.435173	-1.20034	Tb927.11.9910	hypothetical protein, conserved	1.1	0.5	0.803955	-0.314812
														Tb927.4.1930	RNA-binding protein, putative	0.514124	0.350572	0.432348	-1.20973	Tb927.4.1930	RNA-binding protein, putative	0.9	0.7	0.804579	-0.313695
														Tb927.11.8230	hypothetical protein, conserved	0.617992	0.237029	0.42751	-1.22597	Tb927.11.8230	hypothetical protein, conserved	1.1	1	1.09345	0.128883
														Tb927.9.7110	hypothetical protein, conserved	0.520912	0.326804	0.423858	-1.23835	Tb927.9.7110	hypothetical protein, conserved	0.9	0.7	0.835889	-0.258616
														Tb927.4.2000	ruvB-like DNA helicase, putative,ATP-dependent DNA helicase, putative	0.554578	0.287615	0.421097	-1.24778	Tb927.4.2000	ruvB-like DNA helicase, putative,ATP-dependent DNA helicase, putative	1.4	0.9	1.16822	0.224308
														Tb927.10.220	60S ribosomal protein L37a, putative	0.316658	0.5255	0.421079	-1.24784	Tb927.10.220	60S ribosomal protein L37a, putative	6.1	3.1	4.57968	2.19525
														Tb927.8.3840	hypothetical protein, conserved	0.622377	0.219009	0.420693	-1.24916	Tb927.8.3840	hypothetical protein, conserved	1.1	0.9	0.995506	-0.00649755
														Tb927.4.1300	hypothetical protein, conserved	0.51494	0.31732	0.41613	-1.26489	Tb927.4.1300	hypothetical protein, conserved	0.4	0.3	0.356878	-1.4865
														Tb927.7.2450	hypothetical protein, conserved	0.397696	0.43405	0.415873	-1.26578	Tb927.7.2450	hypothetical protein, conserved	1.1	1.3	1.19967	0.262641
														Tb927.7.2190	hypothetical protein, conserved	0.508842	0.322325	0.415583	-1.26679	Tb927.7.2190	hypothetical protein, conserved	0.8	0.5	0.631024	-0.664233
														Tb927.9.12070	hypothetical protein, conserved	0.579653	0.250974	0.415314	-1.26773	Tb927.9.12070	hypothetical protein, conserved	0.8	0.6	0.708539	-0.49708
														Tb927.5.590	protein phosphatase 1, regulatory subunit, putative	0.464967	0.363125	0.414046	-1.27214	Tb927.5.590	protein phosphatase 1, regulatory subunit, putative	1.4	0.8	1.11839	0.161422
														Tb927.11.14190	hypothetical protein, conserved	0.523715	0.301341	0.412528	-1.27743	Tb927.11.14190	hypothetical protein, conserved	1.6	1	1.31434	0.394343
														Tb927.11.5840	Protein translation factor SUI1 homolog, putative	0.557323	0.257382	0.407353	-1.29565	Tb927.11.5840	Protein translation factor SUI1 homolog, putative	0.5	0.4	0.452618	-1.14363
														Tb927.10.14790	aminopeptidase, putative,metallo-peptidase, Clan MG, Family M24	0.568025	0.246	0.407012	-1.29686	Tb927.10.14790	aminopeptidase, putative,metallo-peptidase, Clan MG, Family M24	0.5	0.4	0.435924	-1.19785
														Tb927.7.2360	N-acetyltransferase, putative	0.566376	0.243009	0.404693	-1.3051	Tb927.7.2360	N-acetyltransferase, putative	0.6	0.7	0.684343	-0.547208
														Tb927.5.930	NADH-dependent fumarate reductase	0.507575	0.282746	0.395161	-1.33949	Tb927.5.930	NADH-dependent fumarate reductase	0.7	0.6	0.632508	-0.660844
														Tb927.8.7170	inositol polyphosphate 1-phosphatase, putative	0.460858	0.323178	0.392018	-1.35101	Tb927.8.7170	inositol polyphosphate 1-phosphatase, putative	0.5	0.5	0.501016	-0.997071
														Tb927.10.1320	hypothetical protein, conserved	0.665285	0.118632	0.391959	-1.35123	Tb927.10.1320	hypothetical protein, conserved	0.7	0.6	0.641566	-0.640331
														Tb927.8.6660	paraflagellar rod component, putative	0.445666	0.337257	0.391462	-1.35306	Tb927.8.6660	paraflagellar rod component, putative	0.3	0.3	0.289724	-1.78725
														Tb927.7.4750	hypothetical protein, conserved	0.566549	0.215957	0.391253	-1.35382	Tb927.7.4750	hypothetical protein, conserved	0.8	0.8	0.801338	-0.319518
														Tb927.10.3280	60S ribosomal proteins L38, putative	0.427083	0.353652	0.390368	-1.35709	Tb927.10.3280	60S ribosomal proteins L38, putative	1.3	0.8	1.02384	0.0339943
														Tb927.5.2820	protein kinase, putative	0.605658	0.173785	0.389721	-1.35949	Tb927.5.2820	protein kinase, putative	0.3	0.3	0.31914	-1.64774
														Tb927.9.10490	hypothetical protein, conserved	0.645627	0.126214	0.38592	-1.37363	Tb927.9.10490	hypothetical protein, conserved	0.6	0.6	0.602512	-0.730938
														Tb927.8.6930	serine/threonine-protein kinase NrkA	0.646913	0.122691	0.384802	-1.37781	Tb927.8.6930	serine/threonine-protein kinase NrkA	0.8	0.7	0.755932	-0.403672
														Tb927.6.3650	ADP-ribosylation factor, putative	0.46677	0.297477	0.382124	-1.38789	Tb927.6.3650	ADP-ribosylation factor, putative	0.7	0.6	0.644756	-0.633175
														Tb927.3.2490	hypothetical protein, conserved	0.545863	0.216242	0.381053	-1.39194	Tb927.3.2490	hypothetical protein, conserved	0.5	0.7	0.609797	-0.713599
														Tb927.7.190	thimet oligopeptidase A, putative,metallo- peptidase, Clan MA(E) Family M3, putative	0.489103	0.267076	0.37809	-1.4032	Tb927.7.190	thimet oligopeptidase A, putative,metallo- peptidase, Clan MA(E) Family M3, putative	0.9	0.6	0.740034	-0.434336
														Tb927.7.5160	deoxyuridine triphosphatase, putative,dUTP diphosphatase	0.4779	0.273402	0.375651	-1.41254	Tb927.7.5160	deoxyuridine triphosphatase, putative,dUTP diphosphatase	0.9	0.7	0.761414	-0.393247
														Tb927.9.13380	phosphoinositide-binding protein, putative	0.61944	0.126636	0.373038	-1.42261	Tb927.9.13380	phosphoinositide-binding protein, putative	1.2	0.9	1.08145	0.112969
														Tb927.11.9880	hypothetical protein, conserved	0.395239	0.345464	0.370351	-1.43303	Tb927.11.9880	hypothetical protein, conserved	0.4	0.4	0.402015	-1.31468
														Tb927.10.2730	hypothetical protein, conserved	0.379783	0.344409	0.362096	-1.46556	Tb927.10.2730	hypothetical protein, conserved	0.7	0.6	0.649659	-0.622244
														Tb927.4.2110	protein phosphatase 2C, putative	0.400812	0.31522	0.358016	-1.4819	Tb927.4.2110	protein phosphatase 2C, putative	0.6	0.6	0.562392	-0.830353
														Tb927.7.3990	mitochondrial DNA polymerase I protein C	0.610548	0.104706	0.357627	-1.48347	Tb927.7.3990	mitochondrial DNA polymerase I protein C	1.2	0.4	0.811173	-0.301918
														Tb927.11.3230	60S ribosomal protein L44	0.313494	0.398828	0.356161	-1.4894	Tb927.11.3230	60S ribosomal protein L44	0.8	0.6	0.71048	-0.493134
														Tb927.5.1090	threonyl-tRNA synthetase, putative	0.472601	0.220635	0.346618	-1.52858	Tb927.5.1090	threonyl-tRNA synthetase, putative	0.6	0.6	0.570288	-0.810237
														Tb927.7.4390	threonine synthase, putative	0.551878	0.130869	0.341373	-1.55058	Tb927.7.4390	threonine synthase, putative	0.6	0.6	0.569829	-0.8114
														Tb927.1.1470	hypothetical protein, conserved	0.438199	0.23751	0.337854	-1.56553	Tb927.1.1470	hypothetical protein, conserved	0.5	0.4	0.444407	-1.17005
														Tb927.5.2130	hypothetical protein, conserved	0.468277	0.199737	0.334007	-1.58205	Tb927.5.2130	hypothetical protein, conserved	0.5	0.3	0.422014	-1.24464
														Tb927.5.940	NADH-dependent fumarate reductase, putative	0.382916	0.281374	0.332145	-1.59012	Tb927.5.940	NADH-dependent fumarate reductase, putative	0.5	0.5	0.529563	-0.917126
														Tb927.9.13340	hypothetical protein, conserved	0.537173	0.122818	0.329996	-1.59948	Tb927.9.13340	hypothetical protein, conserved	0.4	0.6	0.482063	-1.05271
														Tb927.3.3190	serine/threonine-protein kinase, putative,protein kinase, putative	0.476354	0.177283	0.326819	-1.61344	Tb927.3.3190	serine/threonine-protein kinase, putative,protein kinase, putative	0.6	0.5	0.519484	-0.944849
														Tb927.10.4560	elongation factor 2	0.381942	0.260166	0.321054	-1.63911	Tb927.10.4560	elongation factor 2	0.6	0.5	0.549035	-0.865029
														Tb927.9.6040	NAD/FAD dependent dehydrogenase, putative,ubiquitin-activating enzyme, putative	0.52574	0.110163	0.317952	-1.65312	Tb927.9.6040	NAD/FAD dependent dehydrogenase, putative,ubiquitin-activating enzyme, putative	1.6	1.1	1.3525	0.435634
														Tb927.6.2690	ubiquitin carboxyl-terminal hydrolase, putative,cysteine peptidase, Clan CA, family C19, putative	0.39772	0.235251	0.316485	-1.65979	Tb927.6.2690	ubiquitin carboxyl-terminal hydrolase, putative,cysteine peptidase, Clan CA, family C19, putative	0.8	0.6	0.713526	-0.486962
														Tb927.1.3110	soluble N-ethylmaleimide sensitive factor (NSF) attachment protein, putative	0.355018	0.272144	0.313581	-1.67309	Tb927.1.3110	soluble N-ethylmaleimide sensitive factor (NSF) attachment protein, putative	0.7	0.5	0.601231	-0.734008
														Tb927.9.8990	hypothetical protein, conserved	0.371714	0.227099	0.299407	-1.73982	Tb927.9.8990	hypothetical protein, conserved	0.9	0.5	0.704293	-0.505753
														Tb927.10.13180	hypothetical protein, conserved	0.576872	0.018947	0.297909	-1.74705	Tb927.10.13180	hypothetical protein, conserved	0.4	0.8	0.622884	-0.682965
														Tb927.10.10880	ATP-binding cassette protein, putative,ABC transporter, putative,ATPase, putative	0.399582	0.187211	0.293397	-1.76908	Tb927.10.10880	ATP-binding cassette protein, putative,ABC transporter, putative,ATPase, putative	0.5	0.4	0.445805	-1.16551
														Tb927.8.2000	cyclophilin type peptidyl-prolyl cis-trans isomerase, putative,peptidyl-prolyl cis-trans isomerase, putative	0.315932	0.258796	0.287364	-1.79905	Tb927.8.2000	cyclophilin type peptidyl-prolyl cis-trans isomerase, putative,peptidyl-prolyl cis-trans isomerase, putative	0.3	0.3	0.30555	-1.71052
														Tb927.10.15530	ABC transporter, putative	0.380668	0.164708	0.272688	-1.87468	Tb927.10.15530	ABC transporter, putative	0.3	0.4	0.369511	-1.43631
														Tb927.5.3120	translation initiation factor, putative	0.340242	0.202186	0.271214	-1.8825	Tb927.5.3120	translation initiation factor, putative	0.4	0.5	0.483059	-1.04973
														Tb927.8.2820	hypothetical protein, conserved	0.399639	0.126703	0.263171	-1.92593	Tb927.8.2820	hypothetical protein, conserved	1.2	0.9	1.05236	0.0736274
														Tb927.9.15470	kinesin, putative	0.340767	0.184102	0.262434	-1.92997	Tb927.9.15470	kinesin, putative	0.1	0.3	0.201089	-2.3141
														Tb927.11.13360	AAA ATPase, putative	0.345536	0.17576	0.260648	-1.93983	Tb927.11.13360	AAA ATPase, putative	1.2	3.1	2.15611	1.10843
														Tb927.10.5810	hypothetical protein, conserved	0.449736	0.0706581	0.260197	-1.94232	Tb927.10.5810	hypothetical protein, conserved	1.6	1.2	1.39624	0.481546
														Tb927.2.3780	translation initiation factor IF-2, putative	0.375563	0.141994	0.258778	-1.95021	Tb927.2.3780	translation initiation factor IF-2, putative	0.6	0.7	0.671661	-0.574195
														Tb927.10.9190	isoleucyl-tRNA synthetase, putative	0.30683	0.207385	0.257108	-1.95956	Tb927.10.9190	isoleucyl-tRNA synthetase, putative	0.6	0.5	0.530521	-0.914518
														Tb927.1.1240	cytidine triphosphate synthase, putative	0.377494	0.134394	0.255944	-1.9661	Tb927.1.1240	cytidine triphosphate synthase, putative	0.2	0.3	0.205426	-2.28331
														Tb927.11.6430	hypothetical protein, conserved	0.384452	0.126154	0.255303	-1.96972	Tb927.11.6430	hypothetical protein, conserved	0.5	0.4	0.431058	-1.21405
														Tb927.10.6800	developmentally regulated GTP-binding protein, putative	0.394044	0.115983	0.255013	-1.97136	Tb927.10.6800	developmentally regulated GTP-binding protein, putative	1.3	0.8	1.06631	0.0926251
														Tb927.10.14000	aconitase	0.292651	0.214403	0.253527	-1.97979	Tb927.10.14000	aconitase	0.7	0.5	0.599679	-0.737737
														Tb927.10.13950	tubulin-specific chaperone, putative	0.324783	0.178833	0.251808	-1.9896	Tb927.10.13950	tubulin-specific chaperone, putative	1.3	0.6	0.952656	-0.0699729
														Tb927.2.2120	protein kinase, putative,NIMA/Nek Serine/threonine-protein kinase family, putative	0.389774	0.11326	0.251517	-1.99127	Tb927.2.2120	protein kinase, putative,NIMA/Nek Serine/threonine-protein kinase family, putative	0.8	0.6	0.718646	-0.476647
														Tb05.5K5.30	serine/threonine protein phosphatase, putative,BAC from homologous region on chr5	0.311912	0.186707	0.249309	-2.00399	Tb05.5K5.30	serine/threonine protein phosphatase, putative,BAC from homologous region on chr5	0.5	0.5	0.519518	-0.944754
														Tb927.10.13790	hypothetical protein, conserved	0.260171	0.230261	0.245216	-2.02787	Tb927.10.13790	hypothetical protein, conserved	1	0.9	0.955983	-0.0649433
														Tb927.7.4070	calpain-like cysteine peptidase, putative,cysteine peptidase, Clan CA, family C2, putative	0.380549	0.101825	0.241187	-2.05178	Tb927.7.4070	calpain-like cysteine peptidase, putative,cysteine peptidase, Clan CA, family C2, putative	1.6	0.6	1.06726	0.093913
														Tb927.6.2550	RNA-binding protein, putative	0.398113	0.0809784	0.239546	-2.06163	Tb927.6.2550	RNA-binding protein, putative	0.5	0.5	0.489062	-1.03191
														Tb927.3.2900	elongation initiation factor 2 alpha subunit, putative	0.283061	0.192889	0.237975	-2.07112	Tb927.3.2900	elongation initiation factor 2 alpha subunit, putative	0.6	0.6	0.603602	-0.72833
														Tb927.10.11210	hypothetical protein, conserved	0.202693	0.270929	0.236811	-2.07819	Tb927.10.11210	hypothetical protein, conserved	0.2	0.2	0.198764	-2.33087
														Tb927.7.2390	hypothetical protein, conserved	0.250547	0.222259	0.236403	-2.08068	Tb927.7.2390	hypothetical protein, conserved	1.2	0.9	1.05649	0.079285
														Tb927.10.4940	serine/threonine protein kinase	0.325054	0.137379	0.231217	-2.11268	Tb927.10.4940	serine/threonine protein kinase	0.4	0.5	0.463177	-1.11036
														Tb927.10.12260	cytosolic nonspecific dipeptidase, putative,peptidase (M20/M25/M40 family), putative	0.296696	0.158103	0.2274	-2.1367	Tb927.10.12260	cytosolic nonspecific dipeptidase, putative,peptidase (M20/M25/M40 family), putative	0.4	0.3	0.353443	-1.50045
														Tb927.11.9960	hypothetical protein, conserved	0.324312	0.12282	0.223566	-2.16123	Tb927.11.9960	hypothetical protein, conserved	0.9	0.5	0.661125	-0.597004
														Tb927.9.1600	hypothetical protein, conserved	0.255515	0.18395	0.219732	-2.18618	Tb927.9.1600	hypothetical protein, conserved	0.6	0.6	0.58866	-0.764494
														Tb927.4.2310	asparaginyl-trna synthetase, putative	0.27478	0.162087	0.218433	-2.19474	Tb927.4.2310	asparaginyl-trna synthetase, putative	0.4	0.3	0.388282	-1.36482
														Tb927.5.2530	hypothetical protein, conserved	0.315531	0.121226	0.218379	-2.19509	Tb927.5.2530	hypothetical protein, conserved	0.1	0.3	0.209861	-2.25249
														Tb927.9.12650	ubiquitin-activating enzyme e1, putative	0.278304	0.158174	0.218239	-2.19602	Tb927.9.12650	ubiquitin-activating enzyme e1, putative	1.2	0.9	1.08573	0.118668
														Tb927.4.1850	hypothetical protein, conserved	0.345374	0.0832426	0.214308	-2.22224	Tb927.4.1850	hypothetical protein, conserved	0.5	0.5	0.453437	-1.14103
														Tb927.7.660	hypothetical protein, conserved	0.286493	0.137316	0.211904	-2.23851	Tb927.7.660	hypothetical protein, conserved	1	0.6	0.808297	-0.307042
														Tb927.7.6620	hypothetical protein, conserved	0.317286	0.102929	0.210107	-2.2508	Tb927.7.6620	hypothetical protein, conserved	0.7	0.5	0.585557	-0.772118
														Tb927.3.1030	RNA-binding protein	0.347983	0.066036	0.207009	-2.27223	Tb927.3.1030	RNA-binding protein	0.4	0.3	0.320309	-1.64246
														Tb927.5.1650	serine/threonine-protein kinase, putative,protein kinase, putative	0.208404	0.18961	0.199007	-2.32911	Tb927.5.1650	serine/threonine-protein kinase, putative,protein kinase, putative	2.4	1.7	2.04061	1.029
														Tb927.3.3030	hypothetical protein, conserved	0.27578	0.111907	0.193844	-2.36704	Tb927.3.3030	hypothetical protein, conserved	0.7	0.5	0.592597	-0.754877
														Tb927.11.5300	kinesin, putative,mitotic centromer-associated kinesin, putative,MCAK-like kinesin, putative	0.323275	0.0639758	0.193625	-2.36866	Tb927.11.5300	kinesin, putative,mitotic centromer-associated kinesin, putative,MCAK-like kinesin, putative	0.3	0.4	0.359416	-1.47627
														Tb927.9.13440	hypothetical protein, conserved	0.208382	0.164843	0.186613	-2.42188	Tb927.9.13440	hypothetical protein, conserved	1.9	1.4	1.64036	0.714012
														Tb927.7.5530	hypothetical protein, conserved	0.271629	0.101009	0.186319	-2.42415	Tb927.7.5530	hypothetical protein, conserved	1.3	0.6	0.921473	-0.117986
														Tb927.2.5060	GTP binding protein, putative	0.242238	0.117913	0.180075	-2.47333	Tb927.2.5060	GTP binding protein, putative	0.6	0.5	0.537851	-0.894722
														Tb927.10.2770	eukaryotic translation initiation factor 5, putative	0.231908	0.126959	0.179434	-2.47848	Tb927.10.2770	eukaryotic translation initiation factor 5, putative	0.4	0.3	0.333521	-1.58415
														Tb927.4.2070	antigenic protein, putative	0.264387	0.0939892	0.179188	-2.48045	Tb927.4.2070	antigenic protein, putative	0.3	0.2	0.284588	-1.81305
														Tb927.3.2170	translation elongation factor EF-2, putative	0.246421	0.108945	0.177683	-2.49262	Tb927.3.2170	translation elongation factor EF-2, putative	0.5	0.4	0.466313	-1.10063
														Tb927.2.5240	PRP19-like protein, putative	0.227174	0.125222	0.176198	-2.50473	Tb927.2.5240	PRP19-like protein, putative	0.2	0.3	0.256875	-1.96086
														Tb927.1.1890	hypothetical protein, conserved	0.245447	0.0950264	0.170237	-2.55439	Tb927.1.1890	hypothetical protein, conserved	0.5	0.3	0.417617	-1.25975
														Tb927.10.12860	hypothetical protein, conserved	0.27645	0.0583985	0.167424	-2.57842	Tb927.10.12860	hypothetical protein, conserved	0.5	0.3	0.398032	-1.32904
														Tb927.1.3950	D-alanine aminotransferase	0.237774	0.0880055	0.16289	-2.61803	Tb927.1.3950	D-alanine aminotransferase	0.5	0.3	0.416722	-1.26284
														Tb927.7.580	GTP-binding protein, putative	0.21329	0.10485	0.15907	-2.65227	Tb927.7.580	GTP-binding protein, putative	0.2	0.2	0.177777	-2.49186
														Tb927.10.2100	elongation factor 1-alpha,EF-1-alpha	0.204856	0.112683	0.15877	-2.65499	Tb927.10.2100	elongation factor 1-alpha,EF-1-alpha	0.3	0.3	0.298514	-1.74413
														Tb927.3.5060	hypothetical protein, conserved	0.270464	0.0351315	0.152798	-2.71031	Tb927.3.5060	hypothetical protein, conserved	0.1	0.2	0.15687	-2.67236
														Tb927.6.2060	histidyl-tRNA synthetase, putative	0.1848	0.11694	0.15087	-2.72862	Tb927.6.2060	histidyl-tRNA synthetase, putative	0.3	0.2	0.269946	-1.88926
														Tb11.02.5400	cystathionine beta-synthase, putative	0.22178	0.0798209	0.1508	-2.72929	Tb11.02.5400	cystathionine beta-synthase, putative	0.4	0.3	0.35492	-1.49443
														Tb927.7.3550	hypothetical protein, conserved	0.163492	0.132634	0.148063	-2.75572	Tb927.7.3550	hypothetical protein, conserved	0.2	0.2	0.189477	-2.39991
														Tb927.3.3490	high mobility group protein, putative	0.171117	0.123406	0.147261	-2.76355	Tb927.3.3490	high mobility group protein, putative	1.5	1.1	1.31296	0.392819
														Tb927.10.8940	hypothetical protein, conserved	0.243198	0.0375888	0.140393	-2.83245	Tb927.10.8940	hypothetical protein, conserved	0.1	0.1	0.145663	-2.77929
														Tb927.10.14240	N-myristoyl transferase, putative	0.178867	0.100887	0.139877	-2.83777	Tb927.10.14240	N-myristoyl transferase, putative	0.3	0.2	0.211478	-2.24142
														Tb927.9.15000	hypothetical protein, conserved	0.187506	0.0870617	0.137284	-2.86476	Tb927.9.15000	hypothetical protein, conserved	0.8	0.6	0.692385	-0.530354
														Tb927.6.4590	glutamyl-tRNA synthetase, putative	0.195441	0.0782046	0.136823	-2.86962	Tb927.6.4590	glutamyl-tRNA synthetase, putative	0.3	0.4	0.330962	-1.59526
														Tb927.7.2400	tyrosyl-tRNA synthetase, putative	0.222375	0.0392954	0.130835	-2.93418	Tb927.7.2400	tyrosyl-tRNA synthetase, putative	0.4	0.4	0.397279	-1.33178
														Tb927.11.13180	hypothetical protein, conserved	0.188078	0.0707691	0.129423	-2.94983	Tb927.11.13180	hypothetical protein, conserved	0.7	0.6	0.671231	-0.575119
														Tb927.5.300	iron/ascorbate oxidoreductase family protein, putative	0.138716	0.119305	0.12901	-2.95444	Tb927.5.300	iron/ascorbate oxidoreductase family protein, putative	4.5	2.6	3.52546	1.81781
														Tb927.1.1030	hypothetical protein, conserved,leucine-rich repeat protein (LRRP), putative	0.159092	0.0945884	0.12684	-2.97892	Tb927.1.1030	hypothetical protein, conserved,leucine-rich repeat protein (LRRP), putative	0.2	0.1	0.184898	-2.4352
														Tb927.8.6080	hypothetical protein, conserved	0.126158	0.115098	0.120628	-3.05136	Tb927.8.6080	hypothetical protein, conserved	0.3	0.3	0.288759	-1.79206
														Tb927.7.1780	Adenine phosphoribosyltransferase, putative	0.0779139	0.127425	0.10267	-3.28392	Tb927.7.1780	Adenine phosphoribosyltransferase, putative	0.4	0.3	0.371145	-1.42995
														Tb927.8.4190	hypothetical protein, conserved	0.152579	0.0488839	0.100732	-3.31141	Tb927.8.4190	hypothetical protein, conserved	0.4	0.3	0.351555	-1.50818
														Tb927.11.2110	hypothetical protein, conserved	0.120421	0.0731047	0.0967631	-3.3694	Tb927.11.2110	hypothetical protein, conserved	0.9	0.3	0.602239	-0.731592
														Tb927.9.8820	hypothetical protein, conserved	0.141495	0.0258184	0.0836569	-3.57937	Tb927.9.8820	hypothetical protein, conserved	0.2	0.2	0.150417	-2.73296
														Tb927.2.4370	trypanothione synthetase	0.0621427	0.102244	0.0821936	-3.60483	Tb927.2.4370	trypanothione synthetase	0.7	0.4	0.581083	-0.783183
														Tb927.7.5770	protein kinase, putative	0.13977	0.0167645	0.0782673	-3.67545	Tb927.7.5770	protein kinase, putative	0.4	0.3	0.33188	-1.59127
														Tb927.4.2740	hypothetical protein, conserved	0.125078	0.0310175	0.0780475	-3.6795	Tb927.4.2740	hypothetical protein, conserved	0.1	0.1	0.112505	-3.15194
														Tb927.9.1340	Nucleoporin	0.0931711	0.0601266	0.0766488	-3.70559	Tb927.9.1340	Nucleoporin	0.1	0.2	0.162099	-2.62505
														Tb927.10.1630	ribonuclease L inhibitor, putative,ATP-binding cassette sub-family E, putative	0.0700956	0.0705436	0.0703196	-3.82993	Tb927.10.1630	ribonuclease L inhibitor, putative,ATP-binding cassette sub-family E, putative	0.4	0.3	0.341899	-1.54836
														Tb927.9.6560	protein kinase, putative	0.102181	0.0364162	0.0692987	-3.85103	Tb927.9.6560	protein kinase, putative	0.8	0.6	0.705824	-0.50262
														Tb927.11.9130	replication factor A, 51kDa subunit, putative	0.103418	0.0331751	0.0682965	-3.87204	Tb927.11.9130	replication factor A, 51kDa subunit, putative	0.6	0.3	0.441291	-1.1802
														Tb927.8.1950	hypothetical protein, conserved	0.0737634	0.0372044	0.0554839	-4.17179	Tb927.8.1950	hypothetical protein, conserved	0.5	0.4	0.445798	-1.16554
														Tb927.7.2640	hypothetical protein, conserved	0.0439515	0.0126281	0.0282898	-5.14358	Tb927.7.2640	hypothetical protein, conserved	0.1	0.1	0.0540669	-4.20911
