# Supplementary material for: Characterization of RBP9 and RBP10, two developmentally regulated RNA-binding proteins in Trypanosoma brucei
Source: Open Biol. 2017 Apr 5;7(4):160159. doi: 10.1098/rsob.160159 (PMC5413900; doi:10.1098/rsob.160159)
Supplement: Table S11 [file rsob160159supp11.xlsx]

## Sheet: Table S11
Table S11. RBP9 BioID anlysisis of >10FC Enriched proteins : 10 Fold Enriched proteins in BirA-RBP0 BioID samples. Blue: Developmentally downregulated regulated proteins, Orange: Developementally Upregulated proteins.
RBP9 BioID						RBP10 induction (h)			RBP9 induction (h)			RBP9 induction (h)								[Annotated GO Function Term]	[Annotated GO Process Term]	[Annotated GO Component Term]
		Fold Enrichment				median normalised expression counts			median normalised expression counts			fold change		log 2 fold change					Starvation granules
accession	Annotation	Expt. 1	Expt.2	Average	Log2 Average	0	5	10	0	12	24	12/ 0	24 / 0	12 / 0	24 / 0	BSF/PCF	p-value	Protein family
Tb927.1.2430	histone H3	6175.56	2663	4419.28	12.1096	5994	5397	5015	4950	5259	5257	1.06242	1.06202	0.08736	0.0868112	1.84	4.89236824521298e-38	histone		DNA binding	nucleosome assembly	nucleosome, nucleus
Tb927.11.12120	RBP9	4920.34	518.438	2719.39	11.4091	41	64	75	72	14843	12251	206.153	170.153	7.68757	7.41069	3.172	1.02626577694638e-56	RNA metabolism		RNA binding	RNA processing	null
Tb927.5.4170	histone H4	1123.56	710.5	917.029	9.84082	0	0	0	0	0	0	#DIV/0!	#DIV/0!	#DIV/0!	#DIV/0!		2.13275289098848e-194	histone		DNA binding	nucleosome assembly	nucleosome, nucleus
Tb927.11.6630	3-methylcrotonoyl-CoA carboxylase beta subunit, putative	812.6	623.8	718.2	9.48824	838	701	601	873	675	595	0.773196	0.681558	-0.371094	-0.553092	0.297	0.0560737	biotin metabolism		methylcrotonoyl-CoA carboxylase activity	null	mitochondrion
Tb927.11.16550	ZC3H46	579.375	436.7	508.038	8.98879	161	149	225	164	450	474	2.7439	2.89024	1.45623	1.53119	0.752	0.744857	RNA metabolism		RNA binding, zinc ion binding	null	null
Tb927.9.10770	PABP2	721.8	286	503.9	8.97699	10655	10135	8528	10118	8059	6741	0.796501	0.666238	-0.328251	-0.58589	0.286	0.0271734	RNA metabolism	SG	RNA binding, poly(A) RNA binding	RNA processing	acidocalcisome
Tb927.10.11390	60S ribosomal protein L6	380.705	564	472.352	8.88372	6656	6647	7862	6785	7372	5250	1.08651	0.773766	0.119707	-0.370031	-0.475	5.67825400239804e-23	Ribosomal		structural constituent of ribosome	translation	acidocalcisome, intracellular, organellar large ribosomal subunit, ribosome
Tb927.7.7420	ATP synthase alpha chain, mitochondrial precursor,ATP synthase F1	350.76	510.681	430.721	8.75061	2714	1622	1336	3332	1253	777	0.37605	0.233193	-1.411	-2.1004	-1.45	1.00673638078656e-21	ETC		hydrogen ion transporting ATP synthase activity, rotational mechanism, proton-transporting ATPase activity, rotational mechanism	ATP synthesis coupled proton transport	acidocalcisome, mitochondrial inner membrane, mitochondrion, proton-transporting ATP synthase complex, catalytic core F(1)
Tb927.11.4300	60S ribosomal protein L18	468.622	368.8	418.711	8.70981	8999	9378	10310	6802	7028	5197	1.03323	0.76404	0.0471552	-0.38828	-0.263	1.25124278860436e-14	Ribosomal		structural constituent of ribosome	null	intracellular, ribosome
Tb927.10.2620	hypothetical protein, conserved	466.358	353.4	409.879	8.67905	691	712	532	1018	659	559	0.647348	0.549116	-0.627387	-0.864817	-0.273	1.10710408001286e-11	hypothetical	SG	null	null	null
Tb927.7.2780	hypothetical protein, conserved	336.52	419.8	378.16	8.56285	577	654	520	439	364	331	0.829157	0.753986	-0.270282	-0.40739	-0.041	2.92690085680798e-06	hypothetical	SG	null	null	null
Tb927.11.4460	ALBA1	450	303.6	376.8	8.55766	1536	2298	1940	2397	2804	2315	1.1698	0.965791	0.226256	-0.0502177	1.023	1.25284812663579e-06	RNA metabolism		nucleic acid binding	null	cytoplasm, cytoplasmic stress granule
Tb927.8.1330	60S ribosomal protein L7a	413.042	280.5	346.771	8.43784	4507	4571	4201	1979	1872	1450	0.945932	0.732693	-0.0801912	-0.448719	-1.276	5.19356748233036e-05	RNA metabolism		structural constituent of ribosome	translation	acidocalcisome, ribosome
Tb927.9.13990	DRBD2	423	210.8	316.9	8.30788	2715	2860	2301	3590	3879	3854	1.0805	1.07354	0.111701	0.102373	-0.038	3.03072691389423e-08	RNA metabolism		RNA binding	RNA processing	acidocalcisome
Tb927.8.900	splicing factor TSR1	23.86	580.7	302.28	8.23974	2699	2748	1981	3700	2200	1528	0.594595	0.412973	-0.750022	-1.27588	-0.532	2.22705787796172e-25	RNA metabolism		RNA binding	RNA processing	acidocalcisome, nucleus
Tb927.8.4290	Ribosome biogenesis protein Nop16	234.036	339	286.518	8.16248	518	395	288	834	492	385	0.589928	0.461631	-0.761389	-1.11519	0.06	0.000369555	RNA metabolism		null	null	null
Tb927.7.210	proline dehydrogenase	378.796	169.094	273.945	8.09774	1605	562	401	1966	462	379	0.234995	0.192777	-2.0893	-2.37499	-0.933	3.55747627900671e-44	Tricarboxilic acid cycle	SG	proline dehydrogenase activity	glutamate biosynthetic process, proline catabolic process	acidocalcisome
Tb927.11.7350	histone H2B variant	295.2	200	247.6	7.95187	1217	1159	886	1008	925	645	0.917659	0.639881	-0.12397	-0.644125	0.156	0.00246365	histone		DNA binding	DNA replication, nucleosome assembly	nucleosome, nucleus
Tb927.10.8200	hypothetical protein, conserved	274.145	206.3	240.222	7.90823	691	584	449	711	664	500	0.933896	0.703235	-0.0986663	-0.507921	-0.121	2.41594090605492e-06	hypothetical		RNA binding	RNA processing	acidocalcisome
Tb927.10.5150	ZC3H31	389.2	89.68	239.44	7.90352	111	114	117	130	137	283	1.05385	2.17692	0.0756643	1.12229	0.945	0.050151	RNA metabolism		RNA binding, zinc ion binding	null	null
Tb927.10.4180	TFIIF-stimulated CTD phosphatase	334.4	113.7	224.05	7.80768	923	1400	2026	1217	2782	3401	2.28595	2.79458	1.19279	1.48263	2.006	6.32981247662768e-45	others		null	null	null
Tb927.10.8720	NOT10	370.6	61.13	215.865	7.75399	2298	2253	2106	2611	2867	3128	1.09805	1.19801	0.134939	0.260638	0.666	0.221571	RNA metabolism	SG	null	null	cytoplasm
Tb927.2.2670	histone H4	319.855	111	215.428	7.75106	1572	1733	1376	1685	1932	1787	1.14659	1.06053	0.197347	0.084791	1.117	1.78622062054224e-08	histone		DNA binding	chromosome organization, nucleosome assembly	nucleosome, nucleus
Tb927.11.4450	ALBA2	256.6	145.6	201.1	7.65177	793	874	907	1426	692	499	0.485273	0.34993	-1.04313	-1.51486	-0.721	1.44971341040938e-31	RNA metabolism		nucleic acid binding	null	acidocalcisome, cytoplasm, cytoplasmic stress granule
Tb927.10.5360	40S ribosomal protein S10	249.591	131.316	190.453	7.57329	1026	803	983	1087	942	805	0.866605	0.74057	-0.206553	-0.433291	-1.247	1.86249239370464e-26	Ribosomal		RNA binding	translation	cytoplasm
Tb927.9.2020	60S ribosomal protein L38, putative	49.38	319.7	184.54	7.52779	6160	6452	6256	4503	5045	4299	1.12036	0.954697	0.163968	-0.0668854	-0.945	2.31342054953404e-45	Ribosomal		structural constituent of ribosome	translation	intracellular, ribosome
Tb927.11.2060	60S acidic ribosomal subunit protein, putative	307.409	40.02	173.715	7.44058	10310	10320	9906	7397	7457	6050	1.00811	0.817899	0.0116551	-0.290005	-0.114	4.08626257081682e-10	Ribosomal		structural constituent of ribosome	ribosome biogenesis, translation, translational elongation	acidocalcisome, intracellular, large ribosomal subunit, ribosome
Tb927.6.4770	mkt1	216.668	123.2	169.934	7.40883	861	955	1214	781	1176	1189	1.50576	1.52241	0.590494	0.606354	0.102	0.132282	RNA metabolism	SG	null	response to DNA damage stimulus	polysome
Tb927.11.11230	40S ribosomal protein L14, putative	126.572	207.3	166.936	7.38315	5536	5721	5907	4348	4130	3007	0.949862	0.691582	-0.0742102	-0.532027	-0.261	2.94920147825516e-11	Ribosomal		structural constituent of ribosome	translation	intracellular, ribosome
Tb927.11.11780	acyl-CoA dehydrogenase, putative	279.475	53.0962	166.286	7.37752	583	464	363	795	364	427	0.457862	0.537107	-1.12702	-0.896719	-0.612	1.1224619521767e-22	others		oxidoreductase activity, oxidoreductase activity, acting on the CH-CH group of donors	metabolic process, oxidation-reduction process	null
Tb927.4.1080	V-type ATPase, A subunit, putative	294.2	37.19	165.695	7.37239	1690	1856	2163	1119	1651	1739	1.47542	1.55407	0.56113	0.636048	0.687	0.175036	atp		hydrogen ion transporting ATP synthase activity, rotational mechanism, proton-transporting ATPase activity, rotational mechanism	ATP synthesis coupled proton transport	proton-transporting V-type ATPase, V1 domain, proton-transporting two-sector ATPase complex
Tb927.11.7380	glycerol-3-phosphate dehydrogenase (FAD-dependent), mitochondrial	255	76.06	165.53	7.37095	1257	2561	2951	1149	1590	1479	1.38381	1.28721	0.468648	0.364243	1.596	6.8140249006153e-17	others		flavin adenine dinucleotide binding, glycerol-3-phosphate dehydrogenase activity	glycerol catabolic process, glycerol-3-phosphate metabolic process	acidocalcisome, glycerol-3-phosphate dehydrogenase complex, mitochondrion
Tb927.4.3550	60S ribosomal protein L13a, putative	152.19	163.2	157.695	7.30099	4426	4837	4563	2891	3377	2354	1.16811	0.814251	0.224174	-0.296454	-0.317	4.1047467997322e-16	Ribosomal		structural constituent of ribosome	translation	intracellular, large ribosomal subunit, ribosome
Tb927.5.2080	guanosine monophosphate reductase, putative	308.323	5.58721	156.955	7.29421	1122	1104	954	1279	934	864	0.730258	0.675528	-0.453522	-0.565913	-0.959	9.88078958238744e-43	nucleotide metabolism	SG	IMP dehydrogenase activity, guanosine deaminase activity	null	acidocalcisome
Tb927.11.9710	60S ribosomal protein L10a, putative	151.4	158.6	155	7.27612	7172	7957	9557	7921	8495	5783	1.07247	0.730085	0.100931	-0.453864	-0.2	6.35372581539577e-08	Ribosomal		RNA binding, structural constituent of ribosome	RNA processing, translation	large ribosomal subunit
Tb927.3.4920	LETM1	240.675	60.93	150.803	7.23652	698	647	490	670	436	367	0.650746	0.547761	-0.619833	-0.868381	0.206	0.0105068	RNA metabolism		calcium ion binding, calcium:sodium antiporter activity	mitochondrial calcium ion transport	integral to membrane, mitochondrial inner membrane
Tb927.10.1550	proteasome regulatory non-ATP-ase subunit 5,19S proteasome regulatory subunit	244.8	35.13	139.965	7.12892	1091	1099	1080	1332	1214	1088	0.911411	0.816817	-0.133826	-0.291916	0.632	0.391046	proteasome	SG	endopeptidase activity	ubiquitin-dependent protein catabolic process	proteasome regulatory particle
Tb927.9.8720	fructose-1,6-bisphosphatase	220.438	55.9305	138.184	7.11045	481	1687	1783	541	1535	1367	2.83734	2.5268	1.50454	1.33731	1.512	1.48565611401139e-18	glycosome, glycolysis		fructose 1,6-bisphosphate 1-phosphatase activity	carbohydrate metabolic process	null
Tb927.10.8980	hypothetical protein, conserved	157.7	112.9	135.3	7.08002	1100	914	721	921	523	372	0.567861	0.403909	-0.81639	-1.3079	-0.379	2.69998147230052e-15	RNA metabolism		null	null	acidocalcisome, mitochondrion
Tb927.4.4730	amino acid transporter, putative	224.6	45.13	134.865	7.07537	2963	2061	2076	2073	3001	1428	1.44766	0.688857	0.533723	-0.537724	-3.35	2.01350021095136e-259	transport		amine transmembrane transporter activity	amino acid transport	null
Tb927.11.880	cyclophilin a,cyclophilin type peptidyl-prolyl cis-trans isomerase	21.7	235	128.35	7.00394	8224	9358	9411	6818	8951	7279	1.31285	1.06762	0.3927	0.0943917	-0.147	7.49417528633282e-11	others		peptidyl-prolyl cis-trans isomerase activity	protein folding	acidocalcisome, cilium, cytosol
Tb927.10.12740	ZC3H35	156.255	99.6	127.928	6.99919	894	544	528	1071	427	397	0.398693	0.370682	-1.32665	-1.43175	0.126	0.000405385	RNA metabolism	SG	RNA binding, nucleic acid binding, zinc ion binding	null	null
Tb927.9.9290	PABP1	120.103	133.7	126.901	6.98756	4739	3776	2125	5859	2620	2114	0.447175	0.360812	-1.16109	-1.47068	-1.187	5.40389467946253e-51	RNA metabolism	SG	RNA binding, poly(A) RNA binding	RNA processing, regulation of translational initiation	cytoplasm, nucleus
Tb927.10.11300	paraflagellar rod component, putative	227.4	14.83	121.115	6.92023	4221	4764	4527	3848	5437	3705	1.41294	0.962838	0.498702	-0.0546353	0.056	1.00875126597601e-05	structural		null	null	acidocalcisome, eukaryotic translation initiation factor 4F complex
Tb927.11.5520	triosephosphate isomerase	49.8399	181.8	115.82	6.85574	5271	5198	3632	5014	3854	2445	0.768648	0.487635	-0.379605	-1.03613	-1.686	1.03743814189507e-99	glycosome, glycolysis		triose-phosphate isomerase activity	glycolysis	acidocalcisome, glycosome
Tb927.3.720	ZFP2	226.955	4.5899	115.773	6.85515	1218	1327	896	2914	1879	1714	0.644818	0.588195	-0.633036	-0.765634	0.119	0.00329957	RNA metabolism	SG	RNA binding, zinc ion binding	null	ribonucleoprotein complex
Tb927.11.11520	glycosomal membrane protein, putative	222.018	7.11246	114.565	6.84002	2307	2373	1678	2520	1279	816	0.50754	0.32381	-0.978407	-1.62678	-0.619	3.40636133109696e-28	glycosome, glycolysis		null	peroxisome fission	acidocalcisome, endoplasmic reticulum, glycosome membrane
Tb927.10.11930	NAD or NADP dependent oxidoreductase	187.62	40.29	113.955	6.83232	515	454	421	459	460	434	1.00218	0.945534	0.00313971	-0.0807991	0.533	0.962441	others		3-hydroxybutyrate dehydrogenase activity	ketone body biosynthetic process	null
Tb927.9.12890	hypothetical protein, conserved	135.14	91.99	113.565	6.82737	184	212	191	402	342	314	0.850746	0.781095	-0.233199	-0.356431	0.817	0.0435038	hypothetical		null	null	null
Tb927.10.12660	PUF2	176.54	49.53	113.035	6.82063	248	268	340	312	362	441	1.16026	1.41346	0.214444	0.499233	1.54	0.274898	RNA metabolism	SG	RNA binding	mRNA metabolic process	cytoplasm
Tb927.3.3580	lipophosphoglycan biosynthetic protein, putative,heat shock protein 90, putative,glucose regulated protein 94, putative	148.33	74.08	111.205	6.79708	3130	2575	1587	2853	2376	1757	0.832808	0.615843	-0.263945	-0.699366	-0.162	1.22267418422641e-11	others	SG	ATP binding, unfolded protein binding	protein folding, response to stress	acidocalcisome
Tb927.10.14140	pyruvate kinase 1	94.02	127.1	110.56	6.78869	3114	6573	14985	2733	13964	12631	5.1094	4.62166	2.35315	2.20841	3.151	2.47483388453277e-140	glycosome, glycolysis		magnesium ion binding, potassium ion binding, pyruvate kinase activity	glycolysis	cytoplasm
Tb927.10.14750	fibrillarin, putative	158.718	62.36	110.539	6.78841	1534	1522	1212	2117	1947	1489	0.919698	0.703354	-0.120768	-0.507678	-0.637	2.86743716710181e-12	RNA metabolism		RNA binding	rRNA processing	acidocalcisome, nucleus
Tb927.11.4210	U-box domain containing protein, putative	183.65	36.61	110.13	6.78306	694	737	803	602	902	989	1.49834	1.64286	0.583364	0.716207	0.183	0.0142019	ubiquitin		ubiquitin-protein ligase activity	protein ubiquitination	ubiquitin ligase complex
Tb927.2.820	retrotransposon hot spot protein (RHS, pseudogene), putative,retrotransposon hot spot protein 1 (RHS1)	192.185	26.7103	109.448	6.7741	3225	3201	3207	4019	3453	3657	0.859169	0.909928	-0.218986	-0.136176	1.351	2.62831480976137e-16	retrotransposon hot spot proteins	SG	null	null	null
Tb927.11.11680	2-oxoglutarate dehydrogenase E2 component, putative	156.42	54.78	105.6	6.72247	6062	3403	2250	4847	2197	1667	0.45327	0.343924	-1.14156	-1.53984	-1.024	1.1209413545691e-52	Tricarboxilic acid cycle		dihydrolipoyllysine-residue succinyltransferase activity	tricarboxylic acid cycle	acidocalcisome, mitochondrion, oxoglutarate dehydrogenase complex
Tb927.8.890	small GTP-binding protein Rab1	152.86	56.97	104.915	6.71308	1774	2162	2623	2058	3605	3444	1.7517	1.67347	0.808756	0.742842	1.27	3.51935844731788e-13	vacuolar trafficking	SG	GTP binding, GTPase activity	intracellular protein transport, nucleocytoplasmic transport, small GTPase mediated signal transduction	acidocalcisome, intracellular
Tb927.9.11580	Gim5A protein,glycosomal membrane protein	79.8584	126.7	103.279	6.69041	2174	2319	1871	3419	2698	1517	0.78912	0.443697	-0.341684	-1.17235	0.003	8.90111441681052e-07	RNA metabolism		null	null	acidocalcisome, glycosome membrane
Tb927.8.3020	hypothetical protein, conserved	158.346	38.19	98.2679	6.61865	1097	990	1040	1248	1198	1589	0.959936	1.27324	-0.05899	0.348501	0.38	0.581825	hypothetical	SG	null	null	null
Tb927.4.4940	hypothetical protein, conserved	111.88	83.83	97.855	6.61257	2171	766	623	1840	630	538	0.342391	0.292391	-1.54628	-1.77403	-1.824	1.61671995062266e-104	hypothetical	SG	null	null	null
Tb927.11.11900	coatomer gamma subunit, putative,cytosolic coat protein, putative	147.412	47.94	97.676	6.60993	1708	1878	1938	1942	2490	3045	1.28218	1.56797	0.358603	0.648899	0.898	0.000597437	vacuolar trafficking		structural molecule activity	intracellular protein transport, retrograde vesicle-mediated transport, Golgi to ER	COPI vesicle coat, Golgi-associated vesicle
Tb927.11.3740	proteasome regulatory ATPase subunit 2	155.38	38.38	96.88	6.59813	1728	1763	1313	1040	1027	837	0.9875	0.804808	-0.0181473	-0.313284	0.403	0.371854	proteasome		ATP binding, ATPase activity	ubiquitin-dependent protein catabolic process	cytoplasm, nucleus, proteasome regulatory particle
Tb927.10.9910	hypothetical protein, conserved	132.12	54.2	93.16	6.54164	908	1058	1082	876	1097	1290	1.25228	1.4726	0.324561	0.558368	0.328	0.0977839	hypothetical		null	null	null
Tb927.10.8270	eukaryotic translation initiation factor 3 subunit 8, putative	149.06	34.73	91.895	6.52191	2459	2255	1675	3196	2107	1643	0.659262	0.51408	-0.601077	-0.959935	0.068	2.68474602180118e-05	RNA metabolism		ribosomal small subunit binding, translation initiation factor activity	translational initiation	eukaryotic translation initiation factor 3 complex
Tb927.8.4810	prohibitin 1	165.84	17.32	91.58	6.51696	494	412	346	795	519	337	0.65283	0.423899	-0.61522	-1.23821	-0.797	2.0430622111928e-29	others		null	mitochondrion organization, regulation of cell cycle, regulation of mitochondrial membrane potential, regulation of mitochondrial translation	acidocalcisome, membrane, mitochondrion
Tb927.9.14000	60S ribosomal protein L12, putative	97.16	83.3	90.23	6.49554	1538	1522	1275	832	1016	805	1.22115	0.967548	0.288245	-0.0475947	0.294	0.107449	Ribosomal		protein complex binding, structural constituent of ribosome	translation	intracellular, ribosome
Tb927.3.1380	ATP synthase beta chain, mitochondrial precursor,ATP synthase F1, beta subunit	136.28	43.91	90.0948	6.49337	12930	11349	6138	11956	5076	3429	0.424557	0.286802	-1.23597	-1.80187	-1.96	3.19186730712838e-128	electron transport chain, atp-binding		ATP binding, GTP binding, hydrogen ion transporting ATP synthase activity, rotational mechanism, hydrogen-exporting ATPase activity, phosphorylative mechanism, proton-transporting ATPase activity, rotational mechanism	ATP synthesis coupled proton transport, proton transport	acidocalcisome, mitochondrial inner membrane, mitochondrial proton-transporting ATP synthase complex, catalytic core F(1), mitochondrion, proton-transporting two-sector ATPase complex
Tb927.6.820	PUF4	148.84	28.27	88.555	6.4685	185	164	147	164	240	196	1.46341	1.19512	0.549339	0.257158	0.404	0.77412	RNA metabolism	SG	RNA binding	null	null
Tb927.11.10200	hypothetical protein, conserved	98.5616	71.91	85.2358	6.41339	671	725	633	590	810	757	1.37288	1.28305	0.457207	0.359578	0.482	0.779152	hypothetical		null	null	null
Tb927.8.4330	small GTP-binding protein Rab11,Rab11A GTPase	137.82	28.73	83.275	6.37981	965	1135	1430	980	1489	1619	1.51939	1.65204	0.60349	0.724249	1.398	8.25466604223103e-16	vacuolar traficking	SG	GTP binding, GTPase activity	endosomal transport, intracellular protein transport, nucleocytoplasmic transport, small GTPase mediated signal transduction, synaptic vesicle uncoating, vesicle-mediated transport	contractile vacuole, endomembrane system, endosome, intracellular
Tb927.7.4180	fatty acid elongase, putative	95.3289	69.88	82.6044	6.36815	2171	1976	1756	1812	1569	1308	0.865894	0.721854	-0.207738	-0.47022	-0.007	3.63429332381433e-07	others	SG	fatty acid elongase activity	long-chain fatty acid biosynthetic process	integral to endoplasmic reticulum membrane
Tb927.1.3180	40S ribosomal protein S11, putative	142.64	16.47	79.555	6.31388	8763	8306	8929	6230	6671	4954	1.07079	0.795185	0.0986709	-0.330638	-0.716	1.7723145617032e-34	Ribosomal		null	translation	intracellular, ribosome
Tb927.7.320	RBP8	98.68	60.23	79.455	6.31207	637	345	301	607	543	638	0.894563	1.05107	-0.160744	0.0718599	0.218	0.0180731	RNA metabolism	SG	RNA binding	RNA processing	acidocalcisome
Tb927.6.850	NOT2	108.56	48.32	78.44	6.29352	1226	1297	1279	1229	1345	1364	1.09439	1.10985	0.130121	0.150359	-0.185	2.83234550039629e-11	RNA metabolism	SG	RNA polymerase II transcription cofactor activity	negative regulation of transcription from RNA polymerase II promoter	nucleus
Tb927.2.4210	glycosomal phosphoenolpyruvate carboxykinase	53.4516	102.464	77.9577	6.28462	9979	7158	4913	7842	2579	1526	0.32887	0.194593	-1.60441	-2.36147	-3.145	7.545475343181e-251	glycosome, glycolysis		ATP binding, microtubule binding, phosphoenolpyruvate carboxykinase (ATP) activity	gluconeogenesis	acidocalcisome, glycosome, vesicle membrane
Tb927.7.1730	60S ribosomal protein L7, putative	58.6961	97.0256	77.8608	6.28283	1884	1474	2172	1904	1896	1522	0.995798	0.79937	-0.00607451	-0.323065	-1.05	2.25085857014201e-45	Ribosomal		structural constituent of ribosome	ribosome biogenesis, translation	acidocalcisome, intracellular, large ribosomal subunit, ribosome
Tb11.0845	dynein light chain LC8, putative	141.82	11.17	76.495	6.25729	964	1148	870	3580	2128	1322	0.594413	0.369274	-0.750461	-1.43724	-0.029	9.79888009814753e-08	RNA metabolism		microtubule motor activity	microtubule-based process	microtubule associated complex
Tb927.10.5620	fructose-bisphosphate aldolase, glycosomal	117.479	32.7114	75.095	6.23065	9686	17169	28064	8645	26823	22147	3.10272	2.56183	1.63353	1.35717	1.772	1.02411636966507e-36	glycosome, glycolysis		fructose-bisphosphate aldolase activity	glycolysis	acidocalcisome, glycosome
Tb927.10.2900	importin beta-1 subunit, putative	133.94	10.25	72.095	6.17183	2169	2077	2022	2661	2023	1287	0.760241	0.483653	-0.395472	-1.04796	0.152	0.000438569	tranport	SG	protein transporter activity	intracellular protein transport, nuclear import, protein import into nucleus, docking	cytoplasm, nuclear pore, nucleus
Tb927.6.3500	endosomal trafficking protein RME-8, putative	121.088	22.85	71.9688	6.1693	2920	3325	5383	2418	2372	3234	0.980976	1.33747	-0.0277102	0.419505	1.798	9.06956085488424e-09	vacuolar traficking	SG	heat shock protein binding	endocytosis	null
Tb927.10.1400	hypoxanthine-guanine phosphoribosyltransferase	133.307	9.66667	71.487	6.15961	491	566	913	437	1001	616	2.29062	1.40961	1.19574	0.495297	-0.95	5.20664448961897e-39	RNA metabolism		hypoxanthine phosphoribosyltransferase activity	purine ribonucleoside salvage	cytoplasm
Tb927.6.5040	ribosomal protein L15, putative	71.1917	71.05	71.1208	6.1522	9292	8704	10032	5591	7093	5538	1.26865	0.99052	0.34329	-0.0137413	-0.563	7.46512116672594e-27	Ribosomal		structural constituent of ribosome	translation	intracellular, ribosome
Tb927.11.5290	mitochondrial carrier protein, putative	113.157	28.48	70.8186	6.14606	572	564	609	527	531	620	1.00759	1.17647	0.0109089	0.234465	0.276	0.0546875	tranport	SG	null	transport	acidocalcisome, integral to membrane, membrane, mitochondrial inner membrane, mitochondrion
Tb927.7.3040	hypothetical protein, conserved	108.924	32.53	70.7271	6.14419	992	953	819	973	1006	1007	1.03392	1.03494	0.0481186	0.049552	-0.34	1.97522862912689e-15	hypothetical	SG	null	null	null
Tb927.11.15150	1-acyl-sn-glycerol-3-phosphate acyltransferase protein, putative	126.02	15.04	70.53	6.14017	580	607	427	468	608	484	1.29915	1.03419	0.377563	0.0484985	0.211	0.00837399	others	SG	1-acylglycerol-3-phosphate O-acyltransferase activity	metabolic process	acidocalcisome, integral to membrane
Tb927.3.3560	U-box domain containing protein, putative	102.148	35.8259	68.9872	6.10826	1754	2029	2473	1644	2650	2539	1.61192	1.5444	0.688782	0.62705	0.82	0.0167957	ubiquitin	SG	ubiquitin-protein ligase activity	protein ubiquitination	ubiquitin ligase complex
Tb927.10.4610	dolicholphosphate-mannose synthase, putative	121.06	15.01	68.035	6.08821	337	352	361	257	347	272	1.35019	1.05837	0.433167	0.0818383	0.546	0.925379	others		dolichyl-phosphate beta-D-mannosyltransferase activity	GPI anchor biosynthetic process	null
Tb927.11.15230	cytosolic coat protein, putative	102.8	30.89	66.845	6.06275	653	799	722	613	685	620	1.11746	1.01142	0.160217	0.0163811	0.942	0.000523352	vacuolar trafficking		protein transmembrane transporter activity	ER to Golgi vesicle-mediated transport	ER to Golgi transport vesicle membrane, integral to membrane
Tb927.10.12960	ras-related protein rab-5,small GTPase, putative	105.22	26.59	65.905	6.04232	648	747	712	441	832	945	1.88662	2.14286	0.915805	1.09954	1.16	3.20602459982452e-08	vacuolar trafficking	SG	GTP binding, GTPase activity	intracellular protein transport, nucleocytoplasmic transport, small GTPase mediated signal transduction	acidocalcisome, intracellular
Tb927.10.12700	pyruvate dehydrogenase E1 alpha subunit, putative	82.06	44.99	63.525	5.98925	4331	4719	4270	4495	5371	5850	1.19488	1.30145	0.25687	0.380116	-0.389	4.51995269048444e-19	others		oxidoreductase activity, acting on the aldehyde or oxo group of donors, disulfide as acceptor	null	acidocalcisome, mitochondrion
Tb927.1.1420	hypothetical protein, conserved	71.6108	54.0724	62.8416	5.97365	1351	1270	1065	1388	1085	1010	0.7817	0.727666	-0.355313	-0.458652	-0.361	7.7127164191952e-16	hypothetical		null	null	null
Tb927.1.2260	calpain-like protein fragment, putative	107.82	15.82	61.82	5.95	1486	758	458	2193	902	655	0.411309	0.298678	-1.28171	-1.74334	-2.673	6.88946995934947e-183	others		null	null	null
Tb927.8.6580	succinate dehydrogenase flavoprotein, putative	112.94	10.53	61.735	5.94802	1564	716	640	1703	975	731	0.572519	0.429243	-0.804604	-1.22014	-1.433	9.56763510919198e-78	electron transport chain		electron carrier activity, flavin adenine dinucleotide binding, succinate dehydrogenase activity	electron transport chain, oxidation-reduction process, tricarboxylic acid cycle	acidocalcisome, mitochondrion
Tb927.9.6870	RNA-binding protein, putative (RBSR1)	35.3	85.27	60.285	5.91373	439	469	279	404	323	306	0.799505	0.757426	-0.322821	-0.400824	-0.232	2.38750905381884e-08	RNA metabolism		RNA binding	RNA processing	acidocalcisome
Tb11.0400	P27 protein, putative (P27)	87.58	23.41	55.495	5.79429	1571	1234	691	1043	397	295	0.380633	0.282838	-1.39353	-1.82195	-1.355	3.7815627230994e-51	vacuolar trafficking		null	regulation of oxidative phosphorylation	cytochrome complex, mitochondrial inner membrane
Tb927.11.16400	kinetoplast DNA-associated protein, putative	65.8017	45.08	55.4409	5.79288	945	638	556	1085	1148	901	1.05806	0.830415	0.0814276	-0.268096	0.482	0.802693	dna binding		DNA binding	DNA metabolic process, DNA packaging	kinetoplast, mitochondrial matrix, mitochondrion
Tb927.10.540	SUB2	107.287	3.47829	55.3826	5.79136	4259	4352	3535	4242	3106	1889	0.732202	0.445309	-0.449687	-1.16712	0.034	2.28442599097694e-06	RNA metabolism	SG	ATP binding, ATP-dependent helicase activity, RNA polymerase I core binding, RNA polymerase II core binding, helicase activity, nucleic acid binding	mRNA metabolic process	nucleus
Tb927.10.510	hypothetical protein, conserved	95.7837	12.33	54.0568	5.75641	424	318	233	348	283	261	0.813218	0.75	-0.298285	-0.415037	-0.415	1.98865149704676e-11	hypothetical	SG	null	null	acidocalcisome, mitochondrial outer membrane
Tb927.3.1590	MRB1590	68.9059	39.0269	53.9664	5.75399	1507	1431	1011	1275	1099	935	0.861961	0.733333	-0.214306	-0.447459	-0.411	6.67801019000043e-17	RNA metabolism		RNA binding	cytidine to uridine editing, mRNA stabilization	mitochondrion
Tb927.8.2460	hypothetical protein, conserved	64.38	42.55	53.465	5.74052	963	1094	974	1342	2262	1926	1.68554	1.43517	0.753214	0.521223	0.58	0.690724	hypothetical		null	null	null
Tb927.11.11590	eukaryotic translation initiation factor, putative	95.1027	11.1475	53.1251	5.73132	2227	2046	1707	2349	1785	1408	0.759898	0.599404	-0.396123	-0.738399	-0.533	3.9950189988687e-24	RNA metabolism	SG	translation initiation factor activity	translational initiation	eukaryotic translation initiation factor 3 complex
Tb927.6.4340	U6 snRNA-associated Sm-like protein LSm5p	52.38	52.78	52.58	5.71644	199	191	190	309	267	261	0.864078	0.84466	-0.210767	-0.243557	0.485	0.863512	RNA metabolism		U6 snRNA 3'-end binding	nuclear mRNA splicing, via spliceosome	nucleus
Tb927.10.9080	pteridine transporter, putative	84.06	19	51.53	5.68734	5971	5171	3393	4407	3867	2374	0.877468	0.538688	-0.188582	-0.892477	-2.618	1.13470161248025e-188	others		biopterin transporter activity	biopterin transport	null
Tb927.11.530	RNA-binding protein, putative (RBP3)	49.92	51.76	50.84	5.66789	135	172	196	206	204	237	0.990291	1.15049	-0.0140752	0.202243	1.574	0.141826	RNA metabolism	SG	RNA binding	null	cytoplasm
Tb927.7.2820	histone H2A, putative	58.5968	42.5873	50.5921	5.66084	0	0	0	0	0	0	#DIV/0!	#DIV/0!	#DIV/0!	#DIV/0!		3.94591427194754e-32	histone		DNA binding	chromosome organization, nucleosome assembly	nucleosome, nucleus
Tb927.10.4640	EIF3-interacting protein, putative	89.512	11.63	50.571	5.66024	2037	2074	1254	1856	1405	1374	0.757004	0.740302	-0.401627	-0.433815	-0.683	3.15893973394549e-28	RNA metabolism	SG	translation initiation factor activity	translational initiation	eukaryotic translation initiation factor 3 complex
Tb927.3.1790	pyruvate dehydrogenase E1 beta subunit, putative	53.5	44.15	48.825	5.60955	3815	3595	2098	3599	3174	2611	0.881912	0.725479	-0.181294	-0.462994	-1.322	1.019786041951e-69	Tricarboxilic acid cycle		catalytic activity	metabolic process	acidocalcisome, mitochondrial inner membrane, mitochondrion
Tb927.5.3400	calcium-translocating P-type ATPase,calcium pump	75.2108	22.0837	48.6473	5.60429	2760	2873	2546	2665	1621	1246	0.608255	0.467542	-0.717251	-1.09683	-0.111	1.21138019578859e-09	others		ATP binding, calcium-transporting ATPase activity	ATP biosynthetic process, calcium ion transport, metabolic process	acidocalcisome, integral to membrane, mitochondrial inner membrane
Tb927.10.730	ATP synthase, putative	78.6513	18.6412	48.6462	5.60426	625	769	906	541	1055	1193	1.95009	2.20518	0.963542	1.14089	0.853	0.00634266	atp-binding		proton-transporting ATPase activity, rotational mechanism	ATP synthesis coupled proton transport	proton-transporting two-sector ATPase complex, vacuolar proton-transporting V-type ATPase, V1 domain
Tb927.6.560	cysteine peptidase C (CPC),CPC cysteine peptidase, Clan CA, family C1, Cathepsin B-like	68.4	26.78	47.59	5.57259	776	1684	2690	578	2127	2264	3.67993	3.91696	1.87968	1.96973	2.491	2.07580924353608e-69	proteolysis		cysteine-type peptidase activity	proteolysis	null
Tb927.11.13970	Pab1p-dependent poly(A) ribonuclease subunit, putative,PAN3	64.5835	29.67	47.1267	5.55847	724	773	711	648	698	702	1.07716	1.08333	0.107233	0.115477	0.388	0.299072	RNA metabolism		null	null	null
Tb927.10.14930	ZC3H39	66.9639	27.2504	47.1071	5.55787	715	785	818	823	1037	1143	1.26002	1.38882	0.333452	0.473861	-0.005	0.0768396	RNA metabolism	SG	RNA binding, ubiquitin-protein ligase activity	protein ubiquitination	ubiquitin ligase complex
Tb927.3.720	zinc finger protein 2	61.48	32.39	46.935	5.55259	1218	1327	896	2914	1879	1714	0.644818	0.588195	-0.633036	-0.765634	0.119	0.00329957	RNA metabolism		RNA binding, zinc ion binding	null	ribonucleoprotein complex
Tb927.11.8800	hypothetical protein, conserved	79.02	11.12	45.07	5.4941	282	292	340	318	308	239	0.968553	0.751572	-0.0460964	-0.412016	0.593	0.7362	hypothetical		null	null	acidocalcisome, mitochondrial inner membrane, mitochondrion
Tb927.10.7500	fibrillarin	59.4	28.57	43.985	5.45894	1149	1212	837	1793	1382	1020	0.770775	0.568879	-0.375618	-0.813806	-0.522	7.22177514412017e-22	RNA metabolism		RNA binding, rRNA 2'-O-ribose methylation guide activity	rRNA processing	acidocalcisome, box C/D snoRNP complex, nucleus
Tb927.3.1410	cytochrome oxidase subunit VII	31.76	55.62	43.69	5.44923	1940	1797	859	1572	731	605	0.465013	0.38486	-1.10466	-1.37759	-2.415	6.8712179694944e-151	electron transport chain		null	null	acidocalcisome, mitochondrion
Tb927.10.13730	60S ribosomal protein L7, putative	66.7603	19.2311	42.9957	5.42612	977	914	587	1149	789	639	0.686684	0.556136	-0.542282	-0.846491	-0.513	4.13430627370844e-18	Ribosomal		structural constituent of ribosome	translation	ribosome
Tb927.1.2570	coatomer beta subunit	63.5975	21.1668	42.3821	5.40538	2309	2373	2887	1866	2314	2286	1.24009	1.22508	0.31044	0.292876	0.887	0.000760818	RNA metabolism	SG	structural molecule activity	intracellular protein transport, vesicle-mediated transport	membrane coat
Tb927.11.5170	ubiquitin activating enzyme, putative	63.3802	21.19	42.2851	5.40208	96	94	127	178	165	138	0.926966	0.775281	-0.109411	-0.367209	0.337	0.296173	ubiquitin		catalytic activity	null	null
Tb927.11.5970	phosphoinositide-specific phospholipase C, putative	64.4	19.66	42.03	5.39335	727	702	603	592	526	599	0.888514	1.01182	-0.170534	0.0169588	0.084	0.000490737	others		phosphatidylinositol phospholipase C activity, phospholipase C activity	intracellular signal transduction, lipid metabolic process, signal transduction	membrane
Tb927.10.5760	adenylate kinase, putative	43.7053	40.05	41.8776	5.38811	1564	1502	1089	1703	852	964	0.500294	0.56606	-0.999153	-0.820973	-1.132	3.6290764959437e-53	nucleotide metabolism	SG	ATP binding, adenylate kinase activity	nucleobase-containing compound metabolic process, nucleobase-containing small molecule interconversion	acidocalcisome
Tb927.7.5340	hypothetical protein, conserved	81.0896	1.73463	41.4121	5.37198	984	911	1126	1231	1727	1955	1.40292	1.58814	0.488437	0.667338	0.633	0.844752	hypothetical		null	null	null
Tb927.7.1240	sphingosine kinase A, B, putative	65.62	15.17	40.395	5.3361	929	757	952	877	1206	1495	1.37514	1.70468	0.459581	0.769497	0.984	0.00561747	others		diacylglycerol kinase activity, sphinganine kinase activity	protein kinase C-activating G-protein coupled receptor signaling pathway, sphinganine metabolic process	cytosol
Tb927.10.9800	60S ribosomal protein L22	64.7514	16.02	40.3857	5.33577	4032	4270	4917	3645	4208	3002	1.15446	0.823594	0.207216	-0.279995	-0.073	1.73637859104903e-08	Ribosomal		structural constituent of ribosome	translation	intracellular, ribosome
Tb927.10.16070	eukaryotic translation initiation factor 4e, putative	41.68	38.52	40.1	5.32553	148	86	69	80	66	38	0.825	0.475	-0.277534	-1.074	-0.425	3.98077107848764e-06	RNA metabolism		RNA binding, RNA cap binding, translation initiation factor activity	translational initiation	cytoplasm
Tb927.11.15070	hypothetical protein, conserved	44.94	34.65	39.795	5.31452	730	625	606	691	497	498	0.719247	0.720695	-0.47544	-0.47254	0.315	0.098194	hypothetical		null	null	mitochondrion
Tb927.10.8890	kinetoplast DNA-associated protein, putative	61.88	17.31	39.595	5.30725	943	921	746	844	984	1114	1.16588	1.31991	0.221415	0.400434	0.788	0.0247383	dna binding		DNA binding	DNA packaging	kinetoplast, mitochondrion
Tb927.9.9660	ATOM40	68.16	10.92	39.54	5.30524	1817	1408	1017	2087	1092	883	0.523239	0.423095	-0.934458	-1.24095	-0.489	1.23325300397128e-21	tranport	SG	null	protein import into mitochondrial matrix	acidocalcisome, integral to mitochondrial outer membrane, mitochondrial outer membrane, mitochondrial outer membrane translocase complex, mitochondrion
Tb927.10.180	ATP synthase F1 subunit gamma protein, putative	46.58	32.09	39.335	5.29774	963	972	667	1257	911	633	0.724741	0.50358	-0.464462	-0.989707	-1.301	7.89601806390978e-57	electron transport chain, atp-binding		hydrogen ion transporting ATP synthase activity, rotational mechanism, proton-transporting ATPase activity, rotational mechanism	ATP synthesis coupled proton transport	acidocalcisome, mitochondrion, proton-transporting ATP synthase complex, catalytic core F(1), proton-transporting two-sector ATPase complex
Tb927.7.4470	hypothetical protein, conserved	55.5	22.61	39.055	5.28744	1664	1936	1520	1371	955	1017	0.696572	0.741794	-0.521656	-0.430909	0.811	0.0110505	hypothetical		null	null	null
Tb927.11.2430	dynein heavy chain, putative	67.3227	10.5973	38.96	5.28392	3899	3688	5491	3960	4886	6664	1.23384	1.68283	0.303153	0.750888	1.327	0.0223704	structural		ATP binding, ATPase activity, microtubule motor activity	chromosome segregation, microtubule-based movement, minus-end-directed vesicle transport along microtubule, mitotic spindle organization	acidocalcisome, dynein complex
Tb927.8.5760	hypothetical protein, conserved	61.979	15.44	38.7095	5.27462	1183	2269	2072	1122	1729	1633	1.541	1.45544	0.623865	0.541452	0.633	0.349714	hypothetical		null	null	null
Tb927.10.15710	mitochondrial carrier protein, putative	61.74	13.17	37.455	5.22709	532	477	426	621	483	560	0.777778	0.901771	-0.36257	-0.149166	0.198	0.0179802	tranport		null	transport	acidocalcisome, mitochondrial inner membrane, mitochondrion
Tb927.5.1580	ZC3H13	67.6178	6.53883	37.0783	5.2125	593	735	776	528	461	526	0.873106	0.996212	-0.195771	-0.00547513	1.146	2.04777802810216e-07	RNA metabolism	SG	RNA binding, zinc ion binding	null	cytosol
Tb927.10.6220	5'-3' exoribonuclease XRND, putative,5'-3' exoribonuclease 2, putative	62.3415	11.21	36.7757	5.20068	995	725	550	985	507	407	0.514721	0.413198	-0.958138	-1.27509	-0.089	1.31876951381829e-07	RNA metabolism	SG	exonuclease activity, nucleic acid binding	RNA processing	acidocalcisome, intracellular, nucleus
Tb927.8.2160	multidrug resistance protein A,p-glycoprotein	61.7955	7.56575	34.6806	5.11606	2493	1438	1437	2231	1460	1085	0.654415	0.486329	-0.611722	-1.04	-0.346	2.14102582461236e-13	tranport		ATP binding, ATPase activity, coupled to transmembrane movement of substances	response to drug, transport	ATP-binding cassette (ABC) transporter complex, integral to membrane
Tb927.6.1000	cysteine peptidase precursor,cysteine peptidase, Clan CA, family C1, Cathepsin L-like	40.4	28.31	34.355	5.10245	10954	16441	11763	6828	17061	16657	2.49868	2.43951	1.32117	1.28659	-0.34	0	proteolysis		cysteine-type peptidase activity	proteolysis	null
Tb927.5.1060	mitochondrial processing peptidase, beta subunit, putative,metallo-peptidase, Clan ME, Family M16	51.38	17.18	34.28	5.0993	2974	1294	1240	2815	1369	877	0.486323	0.311545	-1.04001	-1.68249	-2.67	7.24605304584923e-189	proteolysis		catalytic activity, metalloendopeptidase activity, zinc ion binding	proteolysis	acidocalcisome, mitochondrion
Tb927.7.6930	ATPase, putative	49.62	18.88	34.25	5.09803	438	413	344	314	269	297	0.856688	0.94586	-0.223158	-0.0803016	-0.842	4.43044486124405e-28	atp-binding		ATP binding	null	null
Tb927.9.9630	hypothetical protein, conserved	48.1923	19.7936	33.9929	5.08716	960	1044	915	1176	1354	1134	1.15136	0.964286	0.20334	-0.0524674	0.435	0.544277	hypothetical	SG	null	null	null
Tb927.11.6690	protein kinase, putative	24.65	42.5771	33.6136	5.07097	346	375	405	322	364	410	1.13043	1.27329	0.176878	0.348563	1.318	4.90686866819336e-09	others		ATP binding, protein kinase activity, protein serine/threonine kinase activity, protein tyrosine kinase activity	protein phosphorylation	null
Tb927.7.2170	hypothetical protein, conserved	53.6078	12.5	33.0539	5.04675	2715	2016	1238	3268	1620	1387	0.495716	0.424419	-1.01241	-1.23644	-0.494	2.06790779310355e-21	hypothetical		null	null	acidocalcisome
Tb927.11.10010	vacuolar sorting-associated protein-like, putative	56.655	8.80217	32.7286	5.03248	578	581	686	688	651	652	0.946221	0.947674	-0.079751	-0.0775366	0.89	0.00330122	vacuolar trafficking		null	retrograde transport, endosome to Golgi, vacuolar transport	retromer complex
Tb927.2.1140	retrotransposon hot spot protein (RHS, pseudogene), putative,retrotransposon hot spot protein 3 (RHS3), interrupted	51.88	13.55	32.715	5.03188	144	162	122	178	172	170	0.966292	0.955056	-0.0494687	-0.0663425	4.579	4.04634492585639e-80	retrotransposon hot spot proteins		null	null	null
Tb927.5.295b	retrotransposon hotspot (RHS) protein 1	64.662	0.524093	32.5931	5.02649	2100	2277	2104	2217	1404	1450	0.633288	0.654037	-0.659066	-0.612556	1.297	1.08218135097845e-13	retrotransposon hot spot proteins		null	null	null
Tb927.6.3840	reticulon domain protein	38.32	25.75	32.035	5.00158	3463	3040	1854	3400	2157	1545	0.634412	0.454412	-0.656509	-1.13793	0.389	0.244502	RNA metabolism		null	null	endoplasmic reticulum
Tb927.10.14040	vacuolar ATP synthase subunit c, putative	49.6	14.22	31.91	4.99594	556	530	594	602	756	784	1.25581	1.30233	0.328623	0.38109	0.827	0.0196386	atp-binding		hydrolase activity, acting on acid anhydrides, catalyzing transmembrane movement of substances	ATP synthesis coupled proton transport	proton-transporting V-type ATPase, V1 domain, proton-transporting two-sector ATPase complex
Tb927.10.11590	nicotinate phosphoribosyltransferase, putative	46.84	16.6	31.72	4.98732	635	819	969	758	1201	1038	1.58443	1.36939	0.663966	0.453537	1.003	3.89566094437082e-05	nucleotide metabolism	SG	nicotinate phosphoribosyltransferase activity	nicotinate nucleotide biosynthetic process, nicotinate nucleotide salvage, pyridine nucleotide biosynthetic process	null
Tb05.5K5.60	hypothetical protein, conserved,BAC from homologous region on chr5	46.126	14.87	30.498	4.93064	113	133	114	125	108	76	0.864	0.608	-0.210897	-0.717857	0.58	0.807154	hypothetical		null	null	null
Tb927.2.6050	beta prime COP protein	49.26	10.59	29.925	4.90328	1125	1303	1399	1375	1938	1965	1.40945	1.42909	0.495137	0.515098	0.537	0.957932	vacuolar traficking	SG	structural molecule activity	intracellular protein transport, retrograde vesicle-mediated transport, Golgi to ER	COPI vesicle coat, Golgi apparatus
Tb927.10.11270	RNA-binding protein, putative	47.52	12.32	29.92	4.90304	279	310	205	355	215	143	0.605634	0.402817	-0.723482	-1.3118	-0.676	3.57358496940223e-18	RNA metabolism		RNA binding	RNA processing	null
Tb927.11.15240	small GTPase, putative,ras-related protein rab-2a, putative	38.02	21.74	29.88	4.90111	519	538	560	818	794	1358	0.97066	1.66015	-0.0429618	0.731311	0.734	0.0858746	vacuolar traficking	SG	GTP binding, GTPase activity	intracellular protein transport, nucleocytoplasmic transport, small GTPase mediated signal transduction	acidocalcisome, intracellular, mitochondrial outer membrane
Tb927.8.980	phosphoacetylglucosamine mutase, putative,acetylglucosaminephosphomutase, putative,N-acetylglucosamine-phosphate mutase, putative	53.8527	5.74396	29.7983	4.89716	2889	2902	3478	2645	4840	4475	1.82987	1.69187	0.871739	0.75862	0.104	5.48885961659332e-05	others		phosphoacetylglucosamine mutase activity	carbohydrate metabolic process, glucosamine metabolic process	null
Tb927.7.4950	NAD(p)-dependent steroid dehydrogenase-like protein	44.8	14.16	29.48	4.88166	329	250	252	440	310	432	0.704545	0.981818	-0.505235	-0.0264722	-0.385	3.76566444371843e-13	others		3-beta-hydroxy-delta5-steroid dehydrogenase activity, catalytic activity	steroid biosynthetic process	null
Tb927.5.1700	replication Factor A 28 kDa subunit, putative	40.2735	18.53	29.4018	4.87783	556	713	643	854	1141	1080	1.33607	1.26464	0.417991	0.338723	0.096	0.00277796	dna binding		nucleic acid binding	null	null
Tb927.7.2700	NADH-cytochrome B5 reductase, putative	36.8512	21.56	29.2056	4.86817	2059	1481	855	1622	628	402	0.387176	0.247842	-1.36894	-2.01251	-1.355	6.26801452039883e-64	electron transport chain		electron carrier activity, oxidoreductase activity	null	acidocalcisome, mitochondrion
Tb927.11.3980	mitochondrial processing peptidase alpha subunit, putative,metallo-peptidase, Clan ME, Family M16	40.4	17.86	29.13	4.86443	3438	1684	829	3044	729	594	0.239488	0.195138	-2.06198	-2.35743	-2.114	3.87565399730326e-133	proteolysis		catalytic activity, metalloendopeptidase activity, zinc ion binding	proteolysis	acidocalcisome, mitochondrion
Tb927.11.510	RNA-binding protein (UBP2)	41.1869	16.22	28.7034	4.84315	1237	1026	541	1305	510	461	0.390805	0.353257	-1.35548	-1.50121	-1.127	2.02677345552675e-40	RNA metabolism		RNA binding, mRNA binding	RNA processing	cytoplasm, nucleus
Tb927.5.1000	ubiquitin-conjugating enzyme e2, putative,ubiquitin carrier protein, putative,ubiquitin-protein ligase, putative	34.64	22.38	28.51	4.8334	3824	4266	3327	5667	4636	3898	0.81807	0.687842	-0.289705	-0.539851	0.751	0.035456	ubiquitin		ubiquitin-protein ligase activity	cellular protein modification process, post-translational protein modification, regulation of protein metabolic process	null
Tb927.10.6060	universal minicircle sequence binding protein (UMSBP), putative,DNA-binding protein HEXBP, putative,zinc finger protein	25.2656	31.5185	28.392	4.82741	6272	6385	2185	5522	1928	1131	0.349149	0.204817	-1.51809	-2.28759	-0.796	4.9789665276616e-38	dna binding	SG	nucleic acid binding, zinc ion binding	mitochondrial DNA inheritance, mitosis	null
Tb927.4.470	snoRNP protein GAR1, putative	39.8	15.62	27.71	4.79233	940	877	842	1750	1356	892	0.774857	0.509714	-0.367998	-0.972239	-0.643	1.01479275697091e-26	RNA metabolism		rRNA binding	rRNA processing	acidocalcisome, small nucleolar ribonucleoprotein complex
Tb927.6.1030	cysteine peptidase precursor,cysteine peptidase, Clan CA, family C1, Cathepsin L-like	34.76	19.87	27.315	4.77162	2568	1885	7247	8095	18477	16233	2.28252	2.00531	1.19063	1.00383	2.758	1.75839620179918e-103	proteolysis		cysteine-type peptidase activity	proteolysis	null
Tb927.4.410	CAF 40	24.1107	30.4612	27.286	4.77009	1443	1566	1533	1063	1216	1275	1.14393	1.19944	0.194002	0.262356	0.611	0.588475	RNA metabolism	SG	null	null	acidocalcisome
Tb927.8.7730	hypothetical protein, conserved	31.78	22.7	27.24	4.76765	811	437	459	889	1079	619	1.21372	0.696288	0.27944	-0.522244	-0.502	2.16751334418296e-17	others		sphingosine N-acyltransferase activity	ceramide biosynthetic process	integral to membrane
Tb927.3.5520	26S proteasome regulatory non-ATPase subunit	40.9511	13.27	27.1106	4.76078	2802	2628	2535	3111	3426	3065	1.10125	0.985214	0.139147	-0.0214913	0.954	4.89974189374277e-05	proteolysis	SG	enzyme regulator activity	regulation of protein catabolic process	proteasome complex
Tb927.10.5250	ZC3H32	41.3107	12.3933	26.852	4.74696	220	581	983	291	1175	2148	4.0378	7.38144	2.01357	2.8839	1.282	0.272022	RNA metabolism		RNA binding, zinc ion binding	null	null
Tb927.10.12240	short-chain dehydrogenase, putative	53.0092	0.674516	26.8419	4.74641	988	805	651	1250	1149	898	0.9192	0.7184	-0.121549	-0.477141	-0.756	3.29529962537607e-30	others	SG	oxidoreductase activity	metabolic process	endoplasmic reticulum
Tb927.6.1470	hypothetical protein, conserved	22.52	29.83	26.175	4.71012	1188	1135	880	1417	877	754	0.618913	0.53211	-0.692191	-0.910203	-0.054	1.98394614456703e-07	hypothetical		null	null	acidocalcisome
Tb927.4.100	retrotransposon hot spot protein (RHS, pseudogene), putative,retrotransposon hot spot protein 1 (RHS1), interrupted	37.14	14.73	25.935	4.69683	1517	1450	1592	1535	1142	1257	0.743974	0.818893	-0.426676	-0.288254	1.532	6.38512653388184e-21	retrotransposon hot spot proteins		null	null	null
Tb927.5.800	casein kinase I, isoform 2	32.0258	19.7528	25.8893	4.69428	1999	2262	2581	2686	4092	4569	1.52345	1.70104	0.607347	0.766419	0.56	0.899299	others		ATP binding, protein serine/threonine kinase activity, protein tyrosine kinase activity	protein phosphorylation	acidocalcisome
Tb927.3.1240	protein phosphatase 2A, putative	33.7447	17.15	25.4474	4.66944	706	677	575	530	655	612	1.23585	1.15472	0.305503	0.207539	0.152	0.00359949	others		hydrolase activity, protein serine/threonine phosphatase activity	protein dephosphorylation	null
Tb927.8.3250	dynein heavy chain, putative	39.3599	10.88	25.1199	4.65076	4985	4381	5152	5367	5158	5249	0.961058	0.978014	-0.0573041	-0.0320733	0.695	0.639238	structural		ATP binding, ATPase activity, microtubule motor activity	microtubule-based movement	dynein complex
Tb927.2.5530	hypothetical protein, conserved	37.2243	12.1774	24.7008	4.62649	1429	961	1358	1456	1332	1231	0.914835	0.845467	-0.128416	-0.24218	1.304	0.00020544	hypothetical		null	null	mitochondrial outer membrane
Tb927.9.5890	solanesyl-diphosphate synthase, putative	35.1863	13.3772	24.2818	4.6018	1739	1481	1112	1911	961	777	0.502878	0.406593	-0.991719	-1.29834	-0.289	3.28991215807907e-14	RNA metabolism	SG	trans-hexaprenyltranstransferase activity, trans-octaprenyltranstransferase activity	isoprenoid biosynthetic process, ubiquinone metabolic process	mitochondrion
Tb927.5.3030	intraflagellar transport protein IFT122, putative	39.8204	8.49347	24.1569	4.59436	1627	1507	1664	1478	2000	2120	1.35318	1.43437	0.436354	0.520418	0.756	0.0455592	tranport		null	intraflagellar retrograde transport, intraflagellar transport involved in cilium morphogenesis	null
Tb927.6.2280	hypothetical protein, conserved	47.2228	0.772839	23.9978	4.58483	292	286	214	372	315	227	0.846774	0.610215	-0.239951	-0.71261	-0.095	6.67479634380851e-05	hypothetical	SG	unfolded protein binding	protein folding	prefoldin complex
Tb927.4.2530	hypothetical protein, conserved	23.96	23.98	23.97	4.58316	3493	3807	3054	1906	1564	1222	0.820567	0.641133	-0.285308	-0.641304	0.48	0.784945	hypothetical	SG	null	null	null
Tb927.7.3080	hypothetical protein, conserved	28.16	19.77	23.965	4.58286	332	346	369	311	332	291	1.06752	0.935691	0.0942687	-0.0958954	0.215	0.0245976	hypothetical	SG	null	null	null
Tb927.8.3560	DNA repair and recombination helicase protein PIF1, putative,DNA repair and recombination protein, mitochondrial precursor, putative	33.5063	13.7595	23.6329	4.56272	1364	1066	875	1313	865	923	0.658797	0.70297	-0.602095	-0.508464	0.557	0.862977	dna binding		5'-3' DNA helicase activity, nucleoside-triphosphatase activity, nucleotide binding	DNA replication, Okazaki fragment processing, DNA replication, removal of RNA primer	mitochondrion
Tb927.8.4210	hypothetical protein, conserved	32.62	14.25	23.435	4.55059	884	969	769	952	782	741	0.821429	0.778361	-0.283793	-0.361488	-0.533	5.51487207450189e-23	hypothetical		null	null	null
Tb927.6.4370	eukaryotic translation initiation factor 3 subunit 7-like protein	20.2492	24.91	22.5796	4.49695	2423	2341	1309	2511	1337	1076	0.532457	0.428515	-0.909263	-1.22258	-0.906	1.41900166248074e-40	RNA metabolism	SG	translation initiation factor activity	translational initiation	null
Tb927.11.14130	ribosomal protein L18, putative	20.7461	23.8111	22.2786	4.47759	8431	8950	8065	8142	8743	6759	1.07381	0.83014	0.102745	-0.268573	-0.249	4.94783438997112e-14	Ribosomal		structural constituent of ribosome	translation	acidocalcisome, intracellular, ribosome
Tb927.10.8170	nuclear pore complex protein (NUP155), putative,nucleoporin, putative	37.8452	6.55348	22.1993	4.47244	1478	1418	1241	1286	1284	1051	0.998445	0.817263	-0.00224544	-0.291128	0.377	0.220623	tranport		structural constituent of nuclear pore	nucleocytoplasmic transport	nuclear pore
Tb927.9.6230	arginine kinase	25.2	19.08	22.14	4.46858	112	140	379	86	335	425	3.89535	4.94186	1.96175	2.30505	1.182	0.00230451	nucleotide metabolism		null	null	null
Tb927.2.1330	retrotransposon hot spot protein (RHS, pseudogene), putative,retrotransposon hot spot protein 6 (RHS6), degenerate	27.38	16.84	22.11	4.46663	1087	1197	1069	1028	470	302	0.457198	0.293774	-1.12911	-1.76722	1.744	2.53161632535385e-16	retrotransposon hot spot proteins		null	null	null
Tb927.6.4740	importin-alpha re-exporter protein, putative,cellular apoptosis susceptibility protein, putative	32.3963	10.1604	21.2784	4.41132	1048	891	897	1322	1053	856	0.79652	0.647504	-0.328217	-0.627039	-0.137	1.46244136052822e-09	tranport		importin-alpha export receptor activity, protein transporter activity	cell proliferation, intracellular protein transport, protein import into nucleus, docking	cytoplasm, nuclear pore, nucleus
Tb927.8.3690	isocitrate dehydrogenase [NADP], mitochondrial precursor, putative	40.7648	1.45638	21.1106	4.39989	1954	1174	1170	2483	1349	1542	0.543294	0.621023	-0.880194	-0.687281	0.104	7.1039476890639e-05	Tricarboxilic acid cycle		NAD binding, isocitrate dehydrogenase (NADP+) activity, magnesium ion binding	isocitrate metabolic process, oxidation-reduction process, tricarboxylic acid cycle	acidocalcisome, mitochondrion
Tb927.6.740	ATP-dependent DEAH-box RNA helicase, putative	23.4703	18.2086	20.8395	4.38125	1763	1733	1650	1591	1463	1466	0.919547	0.921433	-0.121004	-0.118049	0.884	0.00141655	RNA metabolism	SG	ATP binding, ATP-dependent helicase activity, helicase activity, nucleic acid binding	null	null
Tb927.10.14550	ATP-dependent DEAD/H RNA helicase, putative	24.757	14.0741	19.4155	4.27914	1008	856	709	1135	885	657	0.779736	0.578855	-0.358943	-0.788727	-0.412	0.0121346	RNA metabolism	SG	ATP binding, ATP-dependent helicase activity, helicase activity, nucleic acid binding	nucleobase-containing compound metabolic process	acidocalcisome
Tb927.10.7310	terminal uridylyltransferase 3, putative	22.74	15.93	19.335	4.27314	279	314	303	303	348	233	1.14851	0.768977	0.19977	-0.378988	0.667	0.347705	nucleotide metabolism		null	null	mitochondrion
Tb927.8.1960	hypothetical protein, conserved	32.804	5.55513	19.1796	4.2615	718	704	614	1045	958	953	0.916746	0.911962	-0.125405	-0.132955	0.296	0.0729153	hypothetical	SG	null	null	cytoplasm, nucleus
Tb927.8.7530	3,2-trans-enoyl-CoA isomerase, mitochondrial precursor, putative	32.0035	5.98166	18.9926	4.24736	1722	1083	671	1866	773	781	0.414255	0.418542	-1.27141	-1.25655	-0.897	7.81252695087844e-36	RNA metabolism	SG	catalytic activity	metabolic process	acidocalcisome, mitochondrion
Tb927.8.7780	hypothetical protein, conserved	27.4014	8.54466	17.973	4.16776	108	322	1031	98	744	1118	7.59184	11.4082	2.92445	3.51199	2.539	5.76987359833626e-18	hypothetical		null	null	null
Tb927.10.9440	NADH dehydrogenase	35.1252	0.786011	17.9556	4.16636	1927	1882	1503	2367	910	798	0.384453	0.337136	-1.37912	-1.5686	-0.473	1.75847584977371e-21	electron transport chain		NADH dehydrogenase (ubiquinone) activity	mitochondrial electron transport, NADH to ubiquinone	mitochondrion
Tb927.8.730	nucleolar RNA-binding protein, putative	31.0186	4.12261	17.5706	4.13509	2586	2652	1427	3081	2361	1641	0.76631	0.532619	-0.384001	-0.908823	-0.876	7.80412098402257e-41	RNA metabolism		RNA binding	RNA metabolic process	nucleolus
Tb927.2.340	retrotransposon hot spot (RHS) protein, putative,retrotransposon hot spot protein 4 (RHS4), putative	24.8863	10.1826	17.5344	4.13212	5710	6328	5337	6254	4783	5172	0.764791	0.826991	-0.386863	-0.274057	3.411	6.99412945995975e-159	retrotransposon hot spot proteins		null	null	nucleus
Tb927.6.1870	eukaryotic translation initiation factor 4e, putative	22.6086	11.18	16.8943	4.07847	1830	1836	1350	1980	1837	1522	0.927778	0.768687	-0.108149	-0.379532	0.139	0.00041801	RNA metabolism	SG	RNA cap binding, translation initiation factor activity	translational initiation	acidocalcisome, cytoplasm
Tb927.11.5250	hypothetical protein, conserved	18.3719	15.1652	16.7685	4.06768	1854	1391	1096	1888	1103	1024	0.584216	0.542373	-0.775426	-0.882643	-0.127	2.63216848605811e-09	hypothetical		null	null	acidocalcisome
Tb927.9.6070	40S ribosomal protein S3, putative	20.5678	12.6668	16.6173	4.05462	9079	8650	8911	6709	5994	4528	0.893427	0.674914	-0.162579	-0.567224	-0.537	6.5181151584279e-16	Ribosomal		RNA binding, nucleic acid binding, structural constituent of ribosome	ribosome biogenesis, translation	intracellular, ribosome, small ribosomal subunit
Tb927.2.4130	enoyl-CoA hydratase/Enoyl-CoA isomerase/3-hydroxyacyl-CoA dehydrogenase, putative	26.9249	5.90708	16.416	4.03703	929	765	682	944	787	817	0.833686	0.865466	-0.262423	-0.208451	0.658	0.310627	glycosome, glycolysis		isomerase activity, oxidoreductase activity	fatty acid metabolic process, metabolic process	mitochondrion
Tb927.6.1500	alkyl-dihydroxyacetone phosphate synthase,alkyl-DHAP synthase,alkylglycerone-phosphate synthase	22.7746	9.95321	16.3639	4.03245	2034	1889	1387	2003	978	1032	0.488268	0.515227	-1.03426	-0.956719	0.083	7.7235054880504e-05	glycosome, glycolysis		alkylglycerone-phosphate synthase activity, flavin adenine dinucleotide binding, oxidoreductase activity	ether lipid biosynthetic process	acidocalcisome, glycosome
Tb927.11.8880	hypothetical protein, conserved	26.9275	5.60757	16.2675	4.02392	315	300	241	166	168	180	1.01205	1.08434	0.017278	0.116814	0.313	0.250417	hypothetical	SG	null	null	null
Tb927.2.560	retrotransposon hot spot (RHS) protein, putative,retrotransposon hot spot protein 4 (RHS4), putative	20.205	12.3	16.2525	4.02259	1344	1412	1219	1717	1303	1378	0.758882	0.802563	-0.398053	-0.317314	2.207	1.8394934599875e-53	retrotransposon hot spot proteins		null	null	nucleus
Tb927.9.6290	arginine kinase	29.9804	1.86118	15.9208	3.99284	2682	2565	5307	2596	7213	5367	2.77851	2.06741	1.47431	1.04783	-0.917	1.08839304513278e-46	atp-binding		ATP binding, arginine kinase activity, transferase activity, transferring phosphorus-containing groups	biological_process	cytosol
Tb927.11.3570	aminopeptidase, putative,metallo-peptidase, Clan MA(E) Family M1	16.3704	14.6696	15.52	3.95606	3432	3420	3405	3113	2549	2216	0.818824	0.711854	-0.288374	-0.490348	-0.128	2.62531686627552e-10	proteolysis		metalloexopeptidase activity, metallopeptidase activity, zinc ion binding	proteolysis	null
Tb927.11.10790	40S ribosomal protein SA, putative	18.4854	11.8701	15.1777	3.92388	15664	18136	9591	13805	11327	6674	0.8205	0.483448	-0.285425	-1.04857	-0.33	0.00275973	Ribosomal		protein complex binding, structural constituent of ribosome	translation	intracellular, organellar small ribosomal subunit, ribosome
Tb927.4.1360	aldose 1-epimerase	14.1139	15.7506	14.9323	3.90036	1373	1062	654	1452	904	746	0.62259	0.513774	-0.683647	-0.960794	-1.975	7.4057762382282e-109	glycosome, glycolysis		carbohydrate binding, isomerase activity	carbohydrate metabolic process	acidocalcisome
Tb927.6.4390	kinesin, putative	15.7328	14.05	14.8914	3.89641	936	1286	2177	867	2136	3209	2.46367	3.70127	1.30081	1.88802	1.611	8.01086984623219e-21	structural		ATP binding, microtubule motor activity, motor activity	microtubule-based movement	microtubule associated complex
Tb927.8.2520	acetyl-CoA synthetase, putative	24.8072	4.34378	14.5755	3.86547	3007	3147	3298	2633	4374	3564	1.66122	1.35359	0.732246	0.43679	0.508	0.91064	biotin metabolism		AMP binding, acetate-CoA ligase activity, catalytic activity	metabolic process	integral to membrane
Tb927.9.14430	casein kinase II, putative	19.3722	9.63622	14.5042	3.8584	658	739	736	591	726	655	1.22843	1.10829	0.296811	0.148337	0.511	0.965925	others		ATP binding, protein serine/threonine kinase activity, protein tyrosine kinase activity	growth, protein phosphorylation	nucleolus
Tb927.10.2020	hexokinase	23.8443	4.96686	14.4056	3.84855	937	246	229	729	289	184	0.396433	0.252401	-1.33485	-1.98621	1.192	1.00044984766852e-08	glycosome, glycolysis		ATP binding, hexokinase activity	carbohydrate metabolic process, glycolysis	acidocalcisome, glycosome
Tb05.5K5.70	nucleolar RNA helicase II, putative,nucleolar RNA helicase Gu, putative,BAC from homologous region on chr5	19.7889	8.85848	14.3237	3.84033	2410	2109	1328	3008	1379	987	0.458444	0.328125	-1.12518	-1.60768	-1.225	2.91060164894286e-62	RNA metabolism		ATP binding, ATP-dependent helicase activity, RNA binding, helicase activity	null	nucleus
Tb927.10.1170	intraflagellar transport protein IFT172, putative	22.6852	5.62335	14.1542	3.82316	2711	2715	3667	2543	3396	3589	1.33543	1.41133	0.417305	0.49705	1.002	5.33933846196957e-05	RNA metabolism	SG	null	intraflagellar transport involved in cilium morphogenesis	acidocalcisome, cilium basal body, motile cilium
Tb927.4.2240	hypothetical protein, conserved	14.9299	13.0252	13.9775	3.80504	1340	572	566	581	702	742	1.20826	1.27711	0.272933	0.352881	0.199	0.00636717	hypothetical		catalytic activity	metabolic process	null
Tb927.3.2830	hypothetical protein, conserved	24.4696	2.20505	13.3373	3.7374	546	463	333	701	498	444	0.710414	0.633381	-0.493269	-0.658855	-0.089	2.86270188484402e-06	hypothetical		null	null	null
Tb927.2.100	retrotransposon hot spot (RHS) protein, putative,retrotransposon hot spot protein 1 (RHS1), putative	18.6282	7.09814	12.8632	3.68518	3252	3246	2995	4220	3114	3142	0.737915	0.74455	-0.438474	-0.42556	1.267	4.90083542086295e-13	retrotransposon hot spot proteins		null	null	acidocalcisome, nucleus
Tb927.10.5610	40S ribosomal protein S9, putative	13.0888	12.5779	12.8334	3.68183	6425	6535	6827	5142	5697	4345	1.10793	0.845002	0.147873	-0.242973	0.336	0.11347	Ribosomal		RNA binding, rRNA binding, structural constituent of ribosome	translation	intracellular, ribosome, small ribosomal subunit
Tb927.10.14470	intraflagellar transport protein IFT140, putative	18.1106	7.40138	12.756	3.6731	1757	1680	2190	1979	2691	3065	1.35978	1.54876	0.443371	0.631115	0.897	0.00585138	structural	SG	null	intraflagellar retrograde transport, intraflagellar transport involved in cilium morphogenesis	null
Tb927.9.3990	ribosomal protein S7, putative	12.3528	13.0648	12.7088	3.66775	15550	15084	17433	9803	11821	7886	1.20586	0.804448	0.270057	-0.31393	0.749	0.0288613	Ribosomal		structural constituent of ribosome	translation	intracellular, ribosome
Tb927.10.12840	mitochondrial carrier protein, putative,mitochondrial 2-oxoglutarate/malate carrier protein, putative	17.1539	8.10736	12.6306	3.65886	3028	3068	1959	3296	2135	1713	0.647755	0.519721	-0.62648	-0.944191	-1.969	4.92554398919679e-120	tranport		null	transport	acidocalcisome, membrane, mitochondrial inner membrane, mitochondrion
Tb927.10.1720	ATP-dependent DEAD/H RNA helicase, putative	22.0995	3.05051	12.575	3.65249	627	479	313	644	369	366	0.572981	0.568323	-0.80344	-0.815217	-0.314	4.17261001088346e-10	RNA metabolism		ATP binding, ATP-dependent helicase activity, helicase activity, nucleic acid binding	nucleobase-containing compound metabolic process	null
Tb927.2.3180	kinetoplast polyadenylation/uridylation factor 1 (KPAF1)	16.7627	8.13523	12.449	3.63796	859	782	729	1329	1126	1027	0.847254	0.772761	-0.239134	-0.371905	0.052	2.34886353972448e-05	RNA metabolism	SG	protein binding, ribosome binding	mRNA 3'-end processing, mRNA polyadenylation, regulation of mRNA stability	mitochondrion
Tb927.10.15370	DNA-directed RNA polymerase, alpha subunit, putative,RNA polymerase subunit, putative	21.3559	3.48965	12.4228	3.63492	652	560	401	658	529	451	0.803951	0.68541	-0.31482	-0.54496	-0.39	7.62628419445164e-14	dna binding		DNA binding, DNA-directed RNA polymerase activity, protein dimerization activity	transcription, DNA-dependent	null
Tb927.6.700	alanyl-tRNA synthetase, putative	20.8761	3.83014	12.3531	3.62681	3344	2864	2130	3383	2488	2404	0.735442	0.710612	-0.443317	-0.492866	0.033	3.26792054960941e-06	nucleotide metabolism		ATP binding, alanine-tRNA ligase activity, nucleic acid binding	alanyl-tRNA aminoacylation, translation	cytoplasm
Tb927.11.6600	hypothetical protein, conserved	19.0975	5.5164	12.3069	3.6214	147	155	249	138	175	169	1.26812	1.22464	0.342687	0.292355	-0.083	0.223412	RNA metabolism		null	modulation of development of symbiont involved in interaction with host, quorum sensing involved in interaction with host	null
Tb927.3.3060	hypothetical protein, conserved	21.3176	3.27101	12.2943	3.61992	472	590	788	664	925	1521	1.39307	2.29066	0.47827	1.19577	1.381	2.66253179352236e-05	hypothetical		null	null	null
Tb927.10.1490	hypothetical protein, conserved	16.1937	8.39118	12.2924	3.6197	3675	3355	3721	3827	3108	3397	0.812124	0.88764	-0.300227	-0.171953	0.374	0.403062	hypothetical		null	null	null
Tb927.11.8770	ATP-dependent DEAD/H RNA helicase, putative,DEAD box RNA helicase, putative,RNA helicase, putative	19.78	2.50576	11.1429	3.47805	892	854	702	1024	856	969	0.835938	0.946289	-0.258533	-0.0796471	0.387	0.30234	RNA metabolism		ATP binding, ATP-dependent helicase activity, helicase activity, nucleic acid binding	maturation of SSU-rRNA from tricistronic rRNA transcript (SSU-rRNA, 5.8S rRNA, LSU-rRNA)	nucleolus
Tb927.11.14330	hypothetical protein, conserved	18.0416	3.87478	10.9582	3.45394	1906	1912	2274	1741	2180	2570	1.25215	1.47616	0.324412	0.561852	0.791	0.189475	hypothetical	SG	acid-amino acid ligase activity, zinc ion binding	cellular protein modification process	intracellular
Tb927.5.760	hypothetical protein, conserved	15.3802	6.1874	10.7838	3.43079	1460	1304	1520	1613	2407	2602	1.49225	1.61314	0.57749	0.689875	0.183	0.238294	hypothetical	SG	phosphoprotein binding	null	null
Tb927.9.7720	hypothetical protein, conserved,predicted tetratricopeptide repeat protein	17.2454	4.22774	10.7366	3.42446	0	0	0	1939	2154	2072	1.11088	1.06859	0.151705	0.0957112	0.772	0.0293138	hypothetical	SG	null	null	null
Tb927.11.7590	hypothetical protein, conserved	10.6963	9.45466	10.0755	3.33277	2103	2037	2302	785	741	820	0.943949	1.04459	-0.0832191	0.0629313	1.028	1.50896267321743e-05	hypothetical	SG	null	null	mitochondrion
