# Supplementary material for: Characterization of RBP9 and RBP10, two developmentally regulated RNA-binding proteins in Trypanosoma brucei
Source: Open Biol. 2017 Apr 5;7(4):160159. doi: 10.1098/rsob.160159 (PMC5413900; doi:10.1098/rsob.160159)
Supplement: Table S12 [file rsob160159supp12.xlsx]

## Sheet: Table S12
Table S12. RBP10 BioID anlysisis of >10FC Enriched proteins : 10 Fold Enriched proteins in BirA-RBP0 BioID samples. Blue: Developmentally downregulated regulated proteins, Orange: Developementally Upregulated proteins.
RBP10 BioID						RBP9 induction (h)			RBP10 induction (h)			RBP10 induction (h)								[Annotated GO Function Term]	[Annotated GO Process Term]	[Annotated GO Component Term]
		Fold Enrichment				median normalised expression counts			median normalised expression counts			fold change		log 2 fold change					Starvation granules
accession	Annotation	Expt. 1	Expt.2	Average	Log2 Average	0	12	24	0	5	10	5 / 0	10 / 0	5 / 0	10 / 0	BSF/PCF	p-value	Protein family
Tb927.8.2780	RBP10	3385.1	1921	2653.03	11.3734	149	508	707	151	31453	31412	208.298	208.026	7.70251	7.70062	2.648	0.00551364	RNA metabolism		RNA binding	RNA processing	null
Tb927.9.2020	60S ribosomal protein L38	1229	799.1	1014.05	9.98591	4503	5045	4299	6160	6452	6256	1.0474	1.01558	0.0668161	0.0223102	-0.945	2.31342054953404e-45	Ribosomal		structural constituent of ribosome	translation	intracellular, ribosome
Tb927.10.5150	ZC3H31	1182.2	796.8	989.5	9.95056	130	137	283	111	114	117	1.02703	1.05405	0.0384741	0.0759489	0.945	0.050151	RNA metabolism		RNA binding, zinc ion binding	null	null
Tb927.10.9740	proteasome regulatory ATPase subunit 6,19S proteasome regulatory subunit	231.8	1161.7	696.756	9.44451	755	915	949	732	726	747	0.991803	1.02049	-0.0118741	0.0292646	0.401	0.346075	proteasome		ATP binding, ATPase activity	ubiquitin-dependent protein catabolic process	cytoplasm, nucleus, proteasome regulatory particle
Tb927.7.2780	hypothetical protein, conserved	490.6	487.2	488.906	8.93341	439	364	331	577	654	520	1.13345	0.901213	0.180719	-0.15006	-0.041	2.92690085680798e-06	hypothetical	SG	null	null	null
Tb927.10.4180	TFIIF-stimulated CTD phosphatase, putative	394	424	409	8.67596	1217	2782	3401	923	1400	2026	1.51679	2.19502	0.601024	1.13423	2.006	6.32981247662768e-45	others		null	null	null
Tb927.1.4420	ABC transporter, putative	435.6	255	345.276	8.43161	670	377	379	690	546	402	0.791304	0.582609	-0.337695	-0.779401	-1.066	3.79815335644827e-43	atp-binding	SG	ATP binding, ATPase activity, coupled to transmembrane movement of substances	transport	ATP-binding cassette (ABC) transporter complex, mitochondrial outer membrane
Tb927.5.3810	orotidine-5-phosphate decarboxylase/orotate phosphoribosyltransferase, putative,OMPDCase-OPRT	447.5	165.7	306.586	8.26015	1914	1089	598	2608	2294	1334	0.879601	0.511503	-0.185078	-0.967185	-1.346	4.0041636359125e-66	others		orotate phosphoribosyltransferase activity, orotidine-5'-phosphate decarboxylase activity	'de novo' pyrimidine nucleobase biosynthetic process, nucleoside metabolic process, pyrimidine ribonucleotide biosynthetic process	acidocalcisome, glycosome
Tb927.11.530	RBP3	359.8	203.6	281.69	8.13796	206	204	237	135	172	196	1.27407	1.45185	0.349449	0.537894	1.574	0.141826	RNA metabolism	SG	RNA binding	null	cytoplasm
Tb927.11.6630	3-methylcrotonoyl-CoA carboxylase beta subunit, putative	102.9	458	280.445	8.13157	873	675	595	838	701	601	0.836516	0.717184	-0.257536	-0.479585	0.297	0.0560737	RNA metabolism		methylcrotonoyl-CoA carboxylase activity	null	mitochondrion
Tb927.11.7380	glycerol-3-phosphate dehydrogenase (FAD-dependent), mitochondrial	158.4	397.6	278	8.11894	1149	1590	1479	1257	2561	2951	2.03739	2.34765	1.02672	1.23122	1.596	6.8140249006153e-17	others		flavin adenine dinucleotide binding, glycerol-3-phosphate dehydrogenase activity	glycerol catabolic process, glycerol-3-phosphate metabolic process	acidocalcisome, glycerol-3-phosphate dehydrogenase complex, mitochondrion
Tb927.5.4170	histone H4	277.2	277.8	277.486	8.11627	0	0	0	0	0	0	#DIV/0!	#DIV/0!	#DIV/0!	#DIV/0!		2.13275289098848e-194	histone		DNA binding	nucleosome assembly	nucleosome, nucleus
Tb927.8.4290	hypothetical protein, conserved	278	276.8	277.4	8.11582	834	492	385	518	395	288	0.762548	0.555985	-0.391099	-0.846883	0.06	0.000369555	hypothetical		null	null	null
Tb927.10.8980	hypothetical protein, conserved	113.9	431.4	272.64	8.09085	921	523	372	1100	914	721	0.830909	0.655455	-0.267237	-0.609432	-0.379	2.69998147230052e-15	hypothetical		null	null	acidocalcisome, mitochondrion
Tb927.9.12890	hypothetical protein, conserved	242.6	263.5	253.05	7.98328	402	342	314	184	212	191	1.15217	1.03804	0.204358	0.0538669	0.817	0.0435038	hypothetical		null	null	null
Tb927.5.520	stomatin-like protein, putative	243.7	209.5	226.622	7.82414	1013	655	644	827	769	503	0.929867	0.608222	-0.104904	-0.717329	-0.034	2.0992984324227e-06	others		null	null	acidocalcisome, integral to membrane, membrane
Tb927.9.10770	PABP2	132.6	272.9	202.78	7.66377	10118	8059	6741	10655	10135	8528	0.951197	0.800375	-0.0721845	-0.321251	0.286	0.0271734	RNA metabolism	SG	RNA binding, poly(A) RNA binding	RNA processing	acidocalcisome
Tb927.11.2060	60S acidic ribosomal subunit protein, putative	109.1	289.6	199.343	7.63911	7397	7457	6050	10310	10320	9906	1.00097	0.960815	0.00139864	-0.0576698	-0.114	4.08626257081682e-10	Ribosomal		structural constituent of ribosome	ribosome biogenesis, translation, translational elongation	acidocalcisome, intracellular, large ribosomal subunit, ribosome
Tb927.11.7350	histone H2B variant, putative	144.6	244.6	194.6	7.60437	1008	925	645	1217	1159	886	0.952342	0.72802	-0.0704486	-0.457951	0.156	0.00246365	histone		DNA binding	DNA replication, nucleosome assembly	nucleosome, nucleus
Tb927.1.2430	histone H3	187.7	189.6	188.611	7.55927	4950	5259	5257	5994	5397	5015	0.9004	0.83667	-0.151361	-0.257269	1.84	4.89236824521298e-38	histone		DNA binding	nucleosome assembly	nucleosome, nucleus
Tb927.9.9660	ATOM40	194	174.4	184.21	7.52521	2087	1092	883	1817	1408	1017	0.774904	0.559714	-0.367911	-0.837239	-0.489	1.23325300397128e-21	transport	SG	null	protein import into mitochondrial matrix	acidocalcisome, integral to mitochondrial outer membrane, mitochondrial outer membrane, mitochondrial outer membrane translocase complex, mitochondrion
Tb927.10.12740	ZC3H35	215.1	148.6	181.836	7.50649	1071	427	397	894	544	528	0.608501	0.590604	-0.716668	-0.759737	0.126	0.000405385	RNA metabolism	SG	RNA binding, nucleic acid binding, zinc ion binding	null	null
Tb927.9.8720	fructose-1,6-bisphosphatase	35.5	323.2	179.335	7.48652	541	1535	1367	481	1687	1783	3.50728	3.70686	1.81035	1.8902	1.512	1.48565611401139e-18	glycosome, glycolysis		fructose 1,6-bisphosphate 1-phosphatase activity	carbohydrate metabolic process	null
Tb927.3.720	ZFP2	311.6	23.5	167.556	7.3885	2914	1879	1714	1218	1327	896	1.08949	0.735632	0.123654	-0.442943	0.119	0.00329957	RNA metabolism	SG	RNA binding, zinc ion binding	null	ribonucleoprotein complex
Tb927.10.540	SUB2	75.1	244.4	159.746	7.31964	4242	3106	1889	4259	4352	3535	1.02184	0.830007	0.0311638	-0.268805	0.034	2.28442599097694e-06	RNA metabolism	SG	ATP binding, ATP-dependent helicase activity, RNA polymerase I core binding, RNA polymerase II core binding, helicase activity, nucleic acid binding	mRNA metabolic process	nucleus
Tb927.7.990	chaperone protein DNAj, putative	115.8	186.8	151.285	7.24113	709	509	546	540	495	383	0.916667	0.709259	-0.125531	-0.495615	0.327	0.121022	RNA metabolism		heat shock protein binding, unfolded protein binding	null	mitochondrial outer membrane
Tb927.11.4460	ALBA1	168.1	124.8	146.48	7.19456	2397	2804	2315	1536	2298	1940	1.49609	1.26302	0.581201	0.336878	1.023	1.25284812663579e-06	RNA metabolism		nucleic acid binding	null	cytoplasm, cytoplasmic stress granule
Tb927.10.12660	PUF2	152.9	128.6	140.76	7.13709	312	362	441	248	268	340	1.08065	1.37097	0.111893	0.455195	1.54	0.274898	RNA metabolism	SG	RNA binding	mRNA metabolic process	cytoplasm
Tb927.6.2280	hypothetical protein, conserved	228.4	47.5	137.945	7.10795	372	315	227	292	286	214	0.979452	0.732877	-0.0299532	-0.448358	-0.095	6.67479634380851e-05	hypothetical		unfolded protein binding	protein folding	prefoldin complex
Tb927.11.14090	ZC3H46	141.9	126.5	134.205	7.0683	3201	2009	1907	3447	4253	2682	1.23383	0.778068	0.30314	-0.362032	-0.328	1.75459275546152e-16	RNA metabolism		null	null	acidocalcisome
Tb927.8.1330	60S ribosomal protein L7a	113.2	130.7	121.984	6.93055	1979	1872	1450	4507	4571	4201	1.0142	0.932106	0.0203424	-0.101435	-1.276	5.19356748233036e-05	Ribosomal		structural constituent of ribosome	translation	acidocalcisome, ribosome
Tb927.8.4330	small GTP-binding protein Rab11,Rab11A GTPase	77.1	166.1	121.595	6.92594	980	1489	1619	965	1135	1430	1.17617	1.48187	0.234091	0.567414	1.398	8.25466604223103e-16	vacuolar traficking	SG	GTP binding, GTPase activity	endosomal transport, intracellular protein transport, nucleocytoplasmic transport, small GTPase mediated signal transduction, synaptic vesicle uncoating, vesicle-mediated transport	contractile vacuole, endomembrane system, endosome, intracellular
Tb927.10.11390	60S ribosomal protein L6, putative	111.7	129.3	120.502	6.91292	6785	7372	5250	6656	6647	7862	0.998648	1.18119	-0.00195208	0.240241	-0.475	5.67825400239804e-23	Ribosomal		structural constituent of ribosome	translation	acidocalcisome, intracellular, organellar large ribosomal subunit, ribosome
Tb927.10.14780	protein kinase, putative,mitogen-activated protein kinase kinase kinase, putative	66.2	164	115.1	6.84674	1272	1322	1182	1941	2149	2108	1.10716	1.08604	0.146865	0.119075	1.138	2.2194230926709e-08	others	SG	ATP binding, protein serine/threonine kinase activity, protein tyrosine kinase activity	protein phosphorylation	null
Tb927.10.5360	40S ribosomal protein S10, putative	70.6	157.2	113.877	6.83133	1087	942	805	1026	803	983	0.782651	0.95809	-0.353559	-0.0617674	-1.247	1.86249239370464e-26	Ribosomal		RNA binding	translation	cytoplasm
Tb927.6.1470	hypothetical protein, conserved	102.7	121.3	111.995	6.80729	1417	877	754	1188	1135	880	0.955387	0.740741	-0.0658425	-0.432959	-0.054	1.98394614456703e-07	hypothetical		null	null	acidocalcisome
Tb927.6.4140	paraflagellar rod component, putative	24.9	189.7	107.303	6.74555	1824	1294	717	2337	2406	1763	1.02953	0.754386	0.0419789	-0.406625	-0.692	1.35135658869432e-29	structural		null	null	null
Tb927.9.13990	DRBD2	87.3	125.4	106.375	6.73302	3590	3879	3854	2715	2860	2301	1.05341	0.847514	0.0750629	-0.238691	-0.038	3.03072691389423e-08	RNA metabolism	SG	RNA binding	RNA processing	acidocalcisome
Tb927.2.3030	ATP-dependent Clp protease subunit, heat shock protein 78 (HSP78), putative,serine peptidase, putative	19.3	193	106.123	6.72959	1927	762	698	1865	1521	909	0.81555	0.487399	-0.294155	-1.03682	0.016	3.45528315415434e-06	proteolysis	SG	ATP binding, nucleoside-triphosphatase activity, serine-type endopeptidase activity, unfolded protein binding	protein folding, proteolysis	acidocalcisome, mitochondrial endopeptidase Clp complex, mitochondrion
Tb927.8.4890	endoplasmic reticulum oxidoreductin, putative,pol-associated gene 1	24.9	181.7	103.29	6.69056	460	478	783	470	971	1860	2.06596	3.95745	1.04681	1.98457	2.215	1.96496636558866e-33	others		disulfide oxidoreductase activity, electron carrier activity, flavin adenine dinucleotide binding, oxidoreductase activity, acting on a sulfur group of donors, disulfide as acceptor	oxidation-reduction process, protein thiol-disulfide exchange	acidocalcisome, endoplasmic reticulum membrane, integral to membrane
Tb927.11.16550	hypothetical protein, conserved	55.2	147.8	101.5	6.66534	164	450	474	161	149	225	0.925466	1.39752	-0.111748	0.482864	0.752	0.744857	RNA metabolism		RNA binding, zinc ion binding	null	null
Tb927.5.1930	signal peptidase subunit, putative	68	131.8	99.865	6.64191	667	1067	1078	923	1076	1179	1.16576	1.27736	0.221276	0.353161	1.269	4.86473146660922e-11	proteolysis		peptidase activity	signal peptide processing	integral to membrane, signal peptidase complex
Tb927.6.3500	endosomal trafficking protein RME-8, putative	53.7	143.3	98.5015	6.62207	2418	2372	3234	2920	3325	5383	1.1387	1.84349	0.187386	0.882442	1.798	9.06956085488424e-09	vacuolar traficking	SG	heat shock protein binding	endocytosis	null
Tb927.11.14090	hypothetical protein, conserved	112.2	84	98.14	6.61677	3201	2009	1907	3447	4253	2682	1.23383	0.778068	0.30314	-0.362032	-0.328	1.75459275546152e-16	hypothetical		null	null	acidocalcisome
Tb927.4.3550	60S ribosomal protein L13a, putative	82.3	110.5	96.3633	6.59041	2891	3377	2354	4426	4837	4563	1.09286	1.03095	0.128109	0.0439792	-0.317	4.1047467997322e-16	Ribosomal		structural constituent of ribosome	translation	intracellular, large ribosomal subunit, ribosome
Tb927.11.9710	60S ribosomal protein L10a, putative	34.9	157.7	96.275	6.58909	7921	8495	5783	7172	7957	9557	1.10945	1.33254	0.149849	0.414182	-0.2	6.35372581539577e-08	Ribosomal		RNA binding, structural constituent of ribosome	RNA processing, translation	large ribosomal subunit
Tb927.11.11230	40S ribosomal protein L14, putative	94.2	95.5	94.888	6.56815	4348	4130	3007	5536	5721	5907	1.03342	1.06702	0.0474234	0.0935817	-0.261	2.94920147825516e-11	Ribosomal		structural constituent of ribosome	translation	intracellular, ribosome
Tb927.10.5620	fructose-bisphosphate aldolase, glycosomal	38.8	150.5	94.6537	6.56459	8645	26823	22147	9686	17169	28064	1.77256	2.89738	0.825833	1.53475	1.772	1.02411636966507e-36	glycosome, glycolysis		fructose-bisphosphate aldolase activity	glycolysis	acidocalcisome, glycosome
Tb927.7.210	proline dehydrogenase	89.8	97.9	93.8396	6.55213	1966	462	379	1605	562	401	0.350156	0.249844	-1.51393	-2.0009	-0.933	3.55747627900671e-44	tricarboxilic acid cycle	SG	proline dehydrogenase activity	glutamate biosynthetic process, proline catabolic process	acidocalcisome
Tb927.10.510	hypothetical protein, conserved	55.2	130.5	92.8785	6.53727	348	283	261	424	318	233	0.75	0.549528	-0.415037	-0.863734	-0.415	1.98865149704676e-11	hypothetical	SG	null	null	acidocalcisome, mitochondrial outer membrane
Tb927.8.4810	prohibitin 1	52.7	130.2	91.425	6.51452	795	519	337	494	412	346	0.834008	0.700405	-0.261867	-0.513739	-0.797	2.0430622111928e-29	others		null	mitochondrion organization, regulation of cell cycle, regulation of mitochondrial membrane potential, regulation of mitochondrial translation	acidocalcisome, membrane, mitochondrion
Tb927.11.11520	glycosomal membrane protein, putative	70	110.4	90.2185	6.49535	2520	1279	816	2307	2373	1678	1.02861	0.727352	0.0406941	-0.459275	-0.619	3.40636133109696e-28	glycosome, glycolysis		null	peroxisome fission	acidocalcisome, endoplasmic reticulum, glycosome membrane
Tb927.7.7420	ATP synthase alpha chain, mitochondrial precursor,ATP synthase F1, alpha subunit	84.1	96.2	90.1285	6.49391	3332	1253	777	2714	1622	1336	0.597642	0.492262	-0.742647	-1.0225	-1.45	1.00673638078656e-21	electron transport chain, apt-binding		hydrogen ion transporting ATP synthase activity, rotational mechanism, proton-transporting ATPase activity, rotational mechanism	ATP synthesis coupled proton transport	acidocalcisome, mitochondrial inner membrane, mitochondrion, proton-transporting ATP synthase complex, catalytic core F(1)
Tb927.11.4300	60S ribosomal protein L18, putative	72	105.4	88.6781	6.47051	6802	7028	5197	8999	9378	10310	1.04212	1.14568	0.0595156	0.196208	-0.263	1.25124278860436e-14	Ribosomal		structural constituent of ribosome	null	intracellular, ribosome
Tb927.11.10200	hypothetical protein, conserved	64.4	111.7	88.0784	6.46072	590	810	757	671	725	633	1.08048	0.943368	0.111668	-0.0841073	0.482	0.779152	hypothetical		null	null	null
Tb927.6.4770	mkt1	74.3	99.6	86.9505	6.44212	781	1176	1189	861	955	1214	1.10918	1.40999	0.149487	0.495683	0.102	0.132282	RNA metabolism	SG	null	response to DNA damage stimulus	polysome
Tb927.11.1740	intraflagellar transport protein IFT88	51.9	115.7	83.825	6.38931	1043	1341	1427	848	904	1050	1.06604	1.23821	0.0922585	0.308253	0.591	0.627708	transport		null	cilium assembly, establishment of cell polarity, intraflagellar transport involved in cilium morphogenesis, regulation of cell size	motile cilium
Tb927.10.15720	proteasome regulatory non-ATP-ase subunit 9,19S proteasome regulatory subunit	17.1	148.1	82.6405	6.36878	1147	1461	1190	1228	1342	1412	1.09283	1.14984	0.128074	0.20143	1.05	1.52234956744308e-06	proteasome		endopeptidase activity	ubiquitin-dependent protein catabolic process	proteasome regulatory particle
Tb927.11.10010	vacuolar sorting-associated protein-like, putative	44.9	118.6	81.7608	6.35334	688	651	652	578	581	686	1.00519	1.18685	0.00746867	0.247139	0.89	0.00330122	vacuolar traficking		null	retrograde transport, endosome to Golgi, vacuolar transport	retromer complex
Tb927.4.1080	V-type ATPase, A subunit, putative	23.6	137.3	80.465	6.33029	1119	1651	1739	1690	1856	2163	1.09822	1.27988	0.135173	0.35601	0.687	0.175036	atp-binding		hydrogen ion transporting ATP synthase activity, rotational mechanism, proton-transporting ATPase activity, rotational mechanism	ATP synthesis coupled proton transport	proton-transporting V-type ATPase, V1 domain, proton-transporting two-sector ATPase complex
Tb927.10.4610	dolicholphosphate-mannose synthase, putative	21.7	138.8	80.255	6.32652	257	347	272	337	352	361	1.04451	1.07122	0.0628268	0.0992502	0.546	0.925379	others		dolichyl-phosphate beta-D-mannosyltransferase activity	GPI anchor biosynthetic process	null
Tb927.10.8890	kinetoplast DNA-associated protein, putative	77	83.4	80.23	6.32607	844	984	1114	943	921	746	0.97667	0.791092	-0.0340566	-0.338082	0.788	0.0247383	dna-binding		DNA binding	DNA packaging	kinetoplast, mitochondrion
Tb927.6.1090	proteasome regulatory ATPase subunit 3	27.2	131.9	79.565	6.31406	993	1054	1098	1228	1236	1066	1.00651	0.868078	0.00936818	-0.204103	0.346	0.151187	proteasome		ATP binding, ATPase activity	ubiquitin-dependent protein catabolic process	cytoplasm, nucleus, proteasome regulatory particle
Tb927.7.1790	Adenine phosphoribosyltransferase, putative	66.1	90	78.06	6.28651	678	415	413	597	597	423	1	0.708543	0	-0.497073	-1.531	8.79890498901273e-70	RNA metabolism		adenine phosphoribosyltransferase activity	purine ribonucleoside salvage	acidocalcisome
Tb927.3.4920	LETM1	73.5	81.4	77.4523	6.27524	670	436	367	698	647	490	0.926934	0.702006	-0.109461	-0.510445	0.206	0.0105068	others		calcium ion binding, calcium:sodium antiporter activity	mitochondrial calcium ion transport	integral to membrane, mitochondrial inner membrane
Tb927.11.11680	2-oxoglutarate dehydrogenase E2 component, putative	27.5	126.2	76.855	6.26407	4847	2197	1667	6062	3403	2250	0.561366	0.371165	-0.832987	-1.42987	-1.024	1.1209413545691e-52	tricarboxilic acid cycle		dihydrolipoyllysine-residue succinyltransferase activity	tricarboxylic acid cycle	acidocalcisome, mitochondrion, oxoglutarate dehydrogenase complex
Tb11.0845	dynein light chain LC8, putative	24.3	125.4	74.84	6.22574	3580	2128	1322	964	1148	870	1.19087	0.90249	0.252018	-0.148018	-0.029	9.79888009814753e-08	structural		microtubule motor activity	microtubule-based process	microtubule associated complex
Tb927.1.2260	calpain-like protein fragment, putative	81.7	67.3	74.49	6.21897	2193	902	655	1486	758	458	0.510094	0.30821	-0.971164	-1.69801	-2.673	6.88946995934947e-183	others		null	null	null
Tb927.10.12960	ras-related protein rab-5,small GTPase, putative	48	100.2	74.075	6.21091	441	832	945	648	747	712	1.15278	1.09877	0.205114	0.135883	1.16	3.20602459982452e-08	vacuolar traficking	SG	GTP binding, GTPase activity	intracellular protein transport, nucleocytoplasmic transport, small GTPase mediated signal transduction	acidocalcisome, intracellular
Tb927.4.4380	vacuolar-type proton translocating pyrophosphatase 1, putative	37.2	110.8	73.985	6.20916	6543	3214	2587	7237	7611	5503	1.05168	0.760398	0.0726942	-0.395173	0.052	4.85007355143532e-06	vacuolar traficking		hydrogen-translocating pyrophosphatase activity, inorganic diphosphatase activity	cellular calcium ion homeostasis, intracellular pH reduction, proton transport	Golgi membrane, acidocalcisome, contractile vacuole
Tb927.10.1400	hypoxanthine-guanine phosphoribosyltransferase	98.2	45.8	72.0066	6.17006	437	1001	616	491	566	913	1.15275	1.85947	0.205079	0.894892	-0.95	5.20664448961897e-39	nucleotide metabolism		hypoxanthine phosphoribosyltransferase activity	purine ribonucleoside salvage	cytoplasm
Tb927.11.3740	proteasome regulatory ATPase subunit 2	33.7	109.4	71.55	6.16088	1040	1027	837	1728	1763	1313	1.02025	0.759838	0.0289293	-0.396236	0.403	0.371854	proteasome		ATP binding, ATPase activity	ubiquitin-dependent protein catabolic process	cytoplasm, nucleus, proteasome regulatory particle
Tb927.11.10160	60S ribosomal protein L22, putative	74.5	68.1	71.2812	6.15545	4777	5325	3744	4579	4519	5429	0.986897	1.18563	-0.019029	0.245654	-0.288	2.54570412300694e-10	Ribosomal		structural constituent of ribosome	translation	intracellular, ribosome
Tb927.10.8200	hypothetical protein, conserved	69.1	73.2	71.1753	6.1533	711	664	500	691	584	449	0.845152	0.649783	-0.242717	-0.62197	-0.121	2.41594090605492e-06	hypothetical		RNA binding	RNA processing	acidocalcisome
Tb927.5.295b	retrotransposon hotspot (RHS) protein 1	26.2	116.1	71.1438	6.15267	2217	1404	1450	2100	2277	2104	1.08429	1.0019	0.116745	0.00274538	1.297	1.08218135097845e-13	retrotransposon hot spot protein		null	null	null
Tb927.10.9800	60S ribosomal protein L22	70.7	70.6	70.6546	6.14271	3645	4208	3002	4032	4270	4917	1.05903	1.21949	0.0827404	0.286283	-0.073	1.73637859104903e-08	Ribosomal		structural constituent of ribosome	translation	intracellular, ribosome
Tb927.11.15150	1-acyl-sn-glycerol-3-phosphate acyltransferase protein, putative	37.4	103.2	70.32	6.13586	468	608	484	580	607	427	1.04655	0.736207	0.0656436	-0.441817	0.211	0.00837399	others	SG	1-acylglycerol-3-phosphate O-acyltransferase activity	metabolic process	acidocalcisome, integral to membrane
Tb927.7.3040	hypothetical protein, conserved	68.8	71.8	70.2687	6.13481	973	1006	1007	992	953	819	0.960685	0.825605	-0.0578639	-0.276477	-0.34	1.97522862912689e-15	hypothetical	SG	null	null	null
Tb927.10.11930	NAD or NADP dependent oxidoreductase, putative,short chain dehydrogenase, putative	26.8	108.4	67.59	6.07874	459	460	434	515	454	421	0.881553	0.817476	-0.18188	-0.290752	0.533	0.962441	others		3-hydroxybutyrate dehydrogenase activity	ketone body biosynthetic process	null
Tb927.3.1970	hypothetical protein, conserved	1.5	129.2	65.3429	6.02996	328	257	263	272	227	240	0.834559	0.882353	-0.260914	-0.180572	0.29	0.127019	hypothetical		null	null	null
Tb927.10.14930	ZC3H39	83.9	42.7	63.2877	5.98385	823	1037	1143	715	785	818	1.0979	1.14406	0.134749	0.194158	-0.005	0.0768396	RNA metabolism	SG	RNA binding, ubiquitin-protein ligase activity	protein ubiquitination	ubiquitin ligase complex
Tb927.6.850	hypothetical protein, conserved	34.5	89	61.76	5.9486	1229	1345	1364	1226	1297	1279	1.05791	1.04323	0.0812195	0.0610573	-0.185	2.83234550039629e-11	RNA metabolism	SG	RNA polymerase II transcription cofactor activity	negative regulation of transcription from RNA polymerase II promoter	nucleus
Tb927.4.4910	3,2-trans-enoyl-CoA isomerase, mitochondrial precursor, putative	34.5	87.5	60.97	5.93003	2105	1307	1042	2114	1934	1190	0.914853	0.562914	-0.128388	-0.829014	-0.808	6.83341005582871e-33	biotin metabolism		catalytic activity	metabolic process	acidocalcisome, mitochondrion
Tb927.8.890	small GTP-binding protein Rab1, putative	42.7	78.2	60.42	5.91695	2058	3605	3444	1774	2162	2623	1.21871	1.47858	0.285361	0.564212	1.27	3.51935844731788e-13	vacuolar traficking	SG	GTP binding, GTPase activity	intracellular protein transport, nucleocytoplasmic transport, small GTPase mediated signal transduction	acidocalcisome, intracellular
Tb927.11.4450	ALBA2	53.9	61.1	57.525	5.84612	1426	692	499	793	874	907	1.10214	1.14376	0.140312	0.193782	-0.721	1.44971341040938e-31	RNA metabolism		nucleic acid binding	null	acidocalcisome, cytoplasm, cytoplasmic stress granule
Tb927.6.3840	reticulon domain protein	43.3	71.1	57.205	5.83807	3400	2157	1545	3463	3040	1854	0.877852	0.535374	-0.187951	-0.901381	0.389	0.244502	others		null	null	endoplasmic reticulum
Tb927.10.9910	hypothetical protein, conserved	47.5	60.7	54.095	5.75742	876	1097	1290	908	1058	1082	1.1652	1.19163	0.220575	0.252936	0.328	0.0977839	hypothetical	SG	null	null	null
Tb927.3.4000	clathrin coat assembly protein ap19, putative	48.6	59.4	54	5.75489	337	454	555	400	488	572	1.22	1.43	0.286881	0.516015	1.501	5.75883749596075e-11	vacuolar traficking		protein transporter activity	intracellular protein transport, vesicle-mediated transport	clathrin adaptor complex, clathrin coat of trans-Golgi network vesicle
Tb927.4.1600	hypothetical protein, conserved	49.3	58.6	53.945	5.75342	333	444	351	246	232	344	0.943089	1.39837	-0.0845335	0.48375	-0.099	1.72809703026614e-06	hypothetical	SG	null	null	acidocalcisome
Tb927.10.14040	vacuolar ATP synthase subunit c, putative	21.4	85.8	53.57	5.74335	602	756	784	556	530	594	0.953237	1.06835	-0.0690925	0.095378	0.827	0.0196386	atp-binding		hydrolase activity, acting on acid anhydrides, catalyzing transmembrane movement of substances	ATP synthesis coupled proton transport	proton-transporting V-type ATPase, V1 domain, proton-transporting two-sector ATPase complex
Tb927.11.16450	hypothetical protein, conserved	30.7	75	52.87	5.72438	272	248	207	263	244	205	0.927757	0.779468	-0.108182	-0.359439	0.131	0.0207786	hypothetical		null	null	null
Tb927.8.2520	acetyl-CoA synthetase, putative	73.7	31.6	52.6932	5.71955	2633	4374	3564	3007	3147	3298	1.04656	1.09677	0.0656523	0.133267	0.508	0.91064	biotin metabolism		AMP binding, acetate-CoA ligase activity, catalytic activity	metabolic process	integral to membrane
Tb927.10.3200	U2 splicing auxiliary factor, putative	52.5	52.3	52.3669	5.71058	1422	1207	871	951	1143	1039	1.20189	1.09253	0.265308	0.127678	0.223	0.00824638	RNA metabolism	SG	RNA binding, zinc ion binding	RNA splicing, RNA splicing, via transesterification reactions, mRNA processing	nuclear speck, nucleus
Tb927.10.2900	importin beta-1 subunit, putative	26.7	77.3	52.025	5.70113	2661	2023	1287	2169	2077	2022	0.957584	0.932227	-0.0625288	-0.101247	0.152	0.000438569	transport	SG	protein transporter activity	intracellular protein transport, nuclear import, protein import into nucleus, docking	cytoplasm, nuclear pore, nucleus
Tb927.7.4470	hypothetical protein, conserved	20.1	83.3	51.655	5.69084	1371	955	1017	1664	1936	1520	1.16346	0.913462	0.218424	-0.130584	0.811	0.0110505	hypothetical		null	null	null
Tb927.11.5450	malic enzyme, putative	11.8	82.2	46.9971	5.5545	1331	1014	1066	1514	1626	1356	1.07398	0.895641	0.102962	-0.159008	-0.265	4.11419060264157e-14	glycosome, glycolysis		NAD binding, NADP+ binding, malic enzyme activity, oxidoreductase activity, acting on the CH-OH group of donors, NAD or NADP as acceptor	malate metabolic process	acidocalcisome, mitochondrion
Tb927.11.14950	ZFP2	50.9	41.6	46.215	5.53029	4016	3112	2342	3718	4223	2615	1.13583	0.703335	0.183741	-0.507716	0.572	0.712397	RNA metabolism	SG	RNA binding, nucleic acid binding, zinc ion binding	cell differentiation, microtubule polymerization	cytoplasm
Tb927.3.3560	hypothetical protein, conserved	27.1	64.6	45.8438	5.51865	1644	2650	2539	1754	2029	2473	1.15678	1.40992	0.21012	0.495613	0.82	0.0167957	ubiquitin	SG	ubiquitin-protein ligase activity	protein ubiquitination	ubiquitin ligase complex
Tb927.1.1420	hypothetical protein, conserved	52.9	38.5	45.7491	5.51567	1388	1085	1010	1351	1270	1065	0.940044	0.788305	-0.0891992	-0.343174	-0.361	7.7127164191952e-16	hypothetical		null	null	null
Tb927.11.15070	hypothetical protein, conserved	33.2	58.2	45.705	5.51428	691	497	498	730	625	606	0.856164	0.830137	-0.22404	-0.268579	0.315	0.098194	hypothetical		null	null	mitochondrion
Tb927.11.260	hypothetical protein, conserved,predicted WD40 repeat protein	33.4	54.8	44.111	5.46307	1052	1078	1174	1037	973	1079	0.938284	1.0405	-0.0919042	0.057279	0.831	0.00972363	transport		null	intraflagellar retrograde transport, intraflagellar transport involved in cilium morphogenesis	null
Tb927.11.880	cyclophilin a,cyclophilin type peptidyl-prolyl cis-trans isomerase	41.8	45.8	43.785	5.45236	6818	8951	7279	8224	9358	9411	1.13789	1.14433	0.18636	0.194508	-0.147	7.49417528633282e-11	others		peptidyl-prolyl cis-trans isomerase activity	protein folding	acidocalcisome, cilium, cytosol
Tb927.9.6870	RBSR1	38.2	49.1	43.68	5.4489	404	323	306	439	469	279	1.06834	0.635535	0.095367	-0.653956	-0.232	2.38750905381884e-08	RNA metabolism		RNA binding	RNA processing	acidocalcisome
Tb927.11.1180	protein kinase, putative,cdc2-related kinase, putative	38.3	48.8	43.5696	5.44525	188	625	814	257	432	593	1.68093	2.30739	0.749263	1.20626	1.893	8.15875055461341e-31	others		ATP binding, protein serine/threonine kinase activity, protein tyrosine kinase activity	growth, protein phosphorylation	null
Tb927.11.11900	coatomer gamma subunit, putative,cytosolic coat protein, putative	36.1	51	43.5537	5.44472	1942	2490	3045	1708	1878	1938	1.09953	1.13466	0.136889	0.182261	0.898	0.000597437	vacuolar traficking		structural molecule activity	intracellular protein transport, retrograde vesicle-mediated transport, Golgi to ER	COPI vesicle coat, Golgi-associated vesicle
Tb927.9.1780	sec1 family transport protein, putative	35.6	51	43.305	5.43646	632	625	726	645	741	765	1.14884	1.18605	0.200174	0.246161	0.757	0.0640154	transport		protein transporter activity	protein secretion, vesicle docking involved in exocytosis, vesicle-mediated transport	mitochondrion
Tb927.2.2670	histone H4, putative	42	42.9	42.4614	5.40808	1685	1932	1787	1572	1733	1376	1.10242	0.875318	0.14067	-0.192121	1.117	1.78622062054224e-08	histone		DNA binding	chromosome organization, nucleosome assembly	nucleosome, nucleus
Tb927.9.12110	6-phosphogluconate dehydrogenase, decarboxylating	17.8	66.2	42.0343	5.3935	1760	1321	982	1530	2198	1934	1.4366	1.26405	0.52266	0.338056	0.069	3.72167992353439e-05	others		NADP binding, phosphogluconate dehydrogenase (decarboxylating) activity	oxidation-reduction process, pentose-phosphate shunt	cytoplasm
Tb927.7.230	40S ribosomal protein S33, putative	29.5	54.3	41.8939	5.38867	1494	1558	1502	629	382	522	0.607313	0.829889	-0.719487	-0.26901	-0.574	0.0392021	Ribosomal		structural constituent of ribosome	translation	intracellular, ribosome
Tb927.2.1180	retrotransposon hot spot (RHS) protein, putative,retrotransposon hot spot protein 3 (RHS3), putative	34.6	47.6	41.1136	5.36154	1010	554	595	554	651	534	1.17509	0.963899	0.232772	-0.0530462	3.131	1.17398057087364e-88	retrotransposon hot spot protein		null	null	nucleus
Tb927.9.3770	hypothetical protein, conserved	36.2	44.5	40.32	5.33342	430	426	435	392	475	467	1.21173	1.19133	0.277074	0.252569	1.256	7.32004144583258e-09	hypothetical		null	null	null
Tb927.11.8380	NADPH--cytochrome p450 reductase, putative	12.6	67.8	40.1624	5.32777	1316	1735	2470	1170	1412	1920	1.20684	1.64103	0.271232	0.714598	0.929	0.000200554	electron transport chain		FMN binding, electron carrier activity, iron ion binding, oxidoreductase activity	oxidation-reduction process	integral to membrane
Tb927.5.960	hypothetical protein, conserved	19.1	60.4	39.7757	5.31382	304	346	291	369	425	405	1.15176	1.09756	0.203842	0.134301	1.042	0.00018467	hypothetical		ATP binding, nucleoside-triphosphatase activity	null	mitochondrial outer membrane
Tb927.11.2430	dynein heavy chain, putative	22.4	55	38.7041	5.27441	3960	4886	6664	3899	3688	5491	0.945884	1.40831	-0.0802655	0.493965	1.327	0.0223704	structural		ATP binding, ATPase activity, microtubule motor activity	chromosome segregation, microtubule-based movement, minus-end-directed vesicle transport along microtubule, mitotic spindle organization	acidocalcisome, dynein complex
Tb927.11.5520	triosephosphate isomerase	38.7	38.4	38.5378	5.2682	5014	3854	2445	5271	5198	3632	0.986151	0.689053	-0.0201201	-0.537312	-1.686	1.03743814189507e-99	glycosome, glycolysis		triose-phosphate isomerase activity	glycolysis	acidocalcisome, glycosome
Tb927.5.3400	calcium-translocating P-type ATPase,calcium pump	28.2	48.1	38.1191	5.25244	2665	1621	1246	2760	2873	2546	1.04094	0.922464	0.0578897	-0.116436	-0.111	1.21138019578859e-09	others		ATP binding, calcium-transporting ATPase activity	ATP biosynthetic process, calcium ion transport, metabolic process	acidocalcisome, integral to membrane, mitochondrial inner membrane
Tb927.9.5890	solanesyl-diphosphate synthase, putative	35.4	40.3	37.8169	5.24096	1911	961	777	1739	1481	1112	0.851639	0.639448	-0.231686	-0.645101	-0.289	3.28991215807907e-14	others	SG	trans-hexaprenyltranstransferase activity, trans-octaprenyltranstransferase activity	isoprenoid biosynthetic process, ubiquinone metabolic process	mitochondrion
Tb927.6.820	pumilio RNA binding protein, putative	31.7	42.6	37.155	5.21548	164	240	196	185	164	147	0.886486	0.794595	-0.173829	-0.331709	0.404	0.77412	RNA metabolism	SG	RNA binding	null	null
Tb927.8.5460	flagellar calcium-binding protein,44 kDa calflagin,44 kDa calcimedin	33.2	41	37.095	5.21315	1021	1372	838	468	500	645	1.06838	1.37821	0.0954196	0.462791	-2.562	6.8762253944551e-158	others		calcium ion binding	calcium ion transport, ciliary cell motility	motile cilium
Tb927.3.3580	lipophosphoglycan biosynthetic protein, putative,heat shock protein 90, putative,glucose regulated protein 94, putative	26.9	46.7	36.8154	5.20224	2853	2376	1757	3130	2575	1587	0.822684	0.507029	-0.28159	-0.979861	-0.162	1.22267418422641e-11	others	SG	ATP binding, unfolded protein binding	protein folding, response to stress	acidocalcisome
Tb927.11.6690	protein kinase, putative	36.4	35.5	35.9424	5.16762	322	364	410	346	375	405	1.08382	1.17052	0.116119	0.22715	1.318	4.90686866819336e-09	others		ATP binding, protein kinase activity, protein serine/threonine kinase activity, protein tyrosine kinase activity	protein phosphorylation	null
Tb927.10.12240	short-chain dehydrogenase, putative	8.4	62.1	35.2775	5.14067	1250	1149	898	988	805	651	0.814777	0.658907	-0.295522	-0.601853	-0.756	3.29529962537607e-30	others	SG	oxidoreductase activity	metabolic process	endoplasmic reticulum
Tb927.7.4180	fatty acid elongase, putative	20.4	50	35.1562	5.13571	1812	1569	1308	2171	1976	1756	0.91018	0.808844	-0.135777	-0.306067	-0.007	3.63429332381433e-07	others	SG	fatty acid elongase activity	long-chain fatty acid biosynthetic process	integral to endoplasmic reticulum membrane
Tb927.5.1580	ZC3H13	44.3	25.1	34.7223	5.11779	528	461	526	593	735	776	1.23946	1.3086	0.309712	0.388025	1.146	2.04777802810216e-07	RNA metabolism	SG	RNA binding, zinc ion binding	null	cytosol
Tb927.11.5780	mitochondrial DNA-directed RNA polymerase	26.6	42.8	34.7105	5.1173	797	723	844	775	753	777	0.971613	1.00258	-0.0415464	0.00371829	0.815	0.0178046	dna-binding		DNA binding, DNA-directed RNA polymerase activity	transcription, DNA-dependent	mitochondrion
Tb927.10.2200	hypothetical protein, conserved	27.5	41.6	34.55	5.11061	181	196	293	156	106	105	0.679487	0.673077	-0.557482	-0.571157	0.436	0.64007	hypothetical		null	null	null
Tb927.9.9290	polyadenylate-binding protein 1, putative	33	35.1	34.0676	5.09033	5859	2620	2114	4739	3776	2125	0.796793	0.448407	-0.327724	-1.15712	-1.187	5.40389467946253e-51	RNA metabolism	SG	RNA binding, poly(A) RNA binding	RNA processing, regulation of translational initiation	cytoplasm, nucleus
Tb927.9.13580	hypothetical protein, conserved	29.3	38.7	34	5.08746	825	491	521	825	665	568	0.806061	0.688485	-0.31104	-0.538503	-1.443	7.04846663257068e-61	hypothetical		null	null	mitochondrion
Tb927.10.6810	guanylate kinase, putative	37.4	30.1	33.745	5.0766	705	320	277	461	529	450	1.14751	0.976139	0.198501	-0.0348417	0.39	0.328124	nucleotide metabolism		null	nucleobase-containing small molecule interconversion	null
Tb927.10.1390	hypoxanthine-guanine phosphoribosyltransferase, putative	24.8	42.2	33.495	5.06587	1876	547	347	2167	2372	1504	1.0946	0.694047	0.130405	-0.526895	-0.953	1.17986100038405e-42	nucleotide metabolism		hypoxanthine phosphoribosyltransferase activity	purine ribonucleoside salvage	acidocalcisome, cytoplasm
Tb927.6.1000	cysteine peptidase precursor,cysteine peptidase, Clan CA, family C1, Cathepsin L-like	29	37.2	33.1	5.04876	6828	17061	16657	10954	16441	11763	1.50091	1.07385	0.58584	0.102798		0	proteolysis		cysteine-type peptidase activity	proteolysis	null
Tb927.10.8490	glucose transporter, putative	25.3	39.2	32.27	5.01212	7389	671	858	10685	2615	658	0.244736	0.0615817	-2.0307	-4.02136	-2.143	1.12649572052773e-144	transport		substrate-specific transmembrane transporter activity	transmembrane transport, transport	integral to membrane, membrane
Tb927.8.5760	hypothetical protein, conserved	16.3	47.7	32.0142	5.00064	1122	1729	1633	1183	2269	2072	1.91801	1.75148	0.939607	0.808574	0.633	0.349714	hypothetical		null	null	null
Tb927.9.10560	hypothetical protein, conserved	34.5	29.4	31.935	4.99707	1342	731	531	1624	1474	670	0.907635	0.412562	-0.139815	-1.27732	-1.254	1.24886075343223e-58	hypothetical		null	null	acidocalcisome, mitochondrial outer membrane, mitochondrion
Tb927.7.2700	NADH-cytochrome B5 reductase, putative	30	32.7	31.3657	4.97112	1622	628	402	2059	1481	855	0.719281	0.41525	-0.475372	-1.26795	-1.355	6.26801452039883e-64	electron transport chain		electron carrier activity, oxidoreductase activity	null	acidocalcisome, mitochondrion
Tb927.11.16400	kinetoplast DNA-associated protein, putative	21.1	41.1	31.1131	4.95945	1085	1148	901	945	638	556	0.675132	0.58836	-0.566758	-0.765229	0.482	0.802693	dna-binding		DNA binding	DNA metabolic process, DNA packaging	kinetoplast, mitochondrial matrix, mitochondrion
Tb927.8.800	hypothetical protein, conserved	24.1	38	31.0616	4.95706	1011	1037	930	1163	1458	1934	1.25365	1.66294	0.32614	0.733737	1.288	0.00643312	hypothetical		null	null	null
Tb927.11.6230	SEC61	9.7	51.9	30.7583	4.9429	3513	4646	4559	3490	4311	4796	1.23524	1.37421	0.304796	0.458605	1.138	2.17337752517586e-09	transport		P-P-bond-hydrolysis-driven protein transmembrane transporter activity	protein secretion, protein transport	Sec61 translocon complex, acidocalcisome, endoplasmic reticulum, integral to membrane, membrane
Tb927.9.9550	hypothetical protein, conserved	18.5	40.6	29.5293	4.88407	631	1242	1093	659	976	923	1.48103	1.40061	0.566603	0.486052	0.083	0.536194	hypothetical		null	null	acidocalcisome
Tb927.8.4210	hypothetical protein, conserved	23.4	34.4	28.875	4.85175	952	782	741	884	969	769	1.09615	0.86991	0.13245	-0.201063	-0.533	5.51487207450189e-23	hypothetical	SG	null	null	null
Tb927.11.8870	mitochondrial DEAD box protein,KREH1	16.6	40.8	28.7318	4.84457	916	673	530	979	872	641	0.890705	0.65475	-0.166981	-0.610985	-0.603	4.85112305199237e-22	RNA metabolism		ATP binding, ATP-dependent helicase activity, RNA helicase activity, nucleic acid binding	mRNA modification, nucleobase-containing compound metabolic process	acidocalcisome, mitochondrion
Tb927.3.2190	RNA triphosphatase	28	28.7	28.3226	4.82388	254	323	305	277	264	284	0.953069	1.02527	-0.069348	0.036005	0.658	0.406713	RNA metabolism		nucleoside-triphosphatase activity, polynucleotide 5'-phosphatase activity	7-methylguanosine mRNA capping	mRNA cap methyltransferase complex
Tb927.4.100	is_pseudo=true retrotransposon hot spot protein (RHS, pseudogene), putative,retrotransposon hot spot protein 1 (RHS1), interrupted	22.9	33.2	28.075	4.81121	1535	1142	1257	1517	1450	1592	0.955834	1.04944	-0.0651682	0.0696193	1.532	6.38512653388184e-21	retrotransposon hot spot protein		null	null	null
Tb927.11.5170	ubiquitin activating enzyme, putative	27.3	28.8	28.0167	4.80821	178	165	138	96	94	127	0.979167	1.32292	-0.0303736	0.403722	0.337	0.296173	ubiquitin		catalytic activity	null	null
Tb927.9.14430	casein kinase II, putative	14	41.9	27.952	4.80488	591	726	655	658	739	736	1.1231	1.11854	0.167487	0.161618	0.511	0.965925	others		ATP binding, protein serine/threonine kinase activity, protein tyrosine kinase activity	growth, protein phosphorylation	nucleolus
Tb927.3.1410	cytochrome oxidase subunit VII	24.4	30.6	27.51	4.78188	1572	731	605	1940	1797	859	0.926289	0.442784	-0.110466	-1.17533	-2.415	6.8712179694944e-151	electron transport chain		null	null	acidocalcisome, mitochondrion
Tb927.10.9440	NADH dehydrogenase	6.7	48.3	27.5026	4.7815	2367	910	798	1927	1882	1503	0.976648	0.779969	-0.0340899	-0.358512	-0.473	1.75847584977371e-21	electron transport chain		NADH dehydrogenase (ubiquinone) activity	mitochondrial electron transport, NADH to ubiquinone	mitochondrion
Tb927.6.5040	ribosomal protein L15, putative	23.1	30.9	26.9992	4.75485	5591	7093	5538	9292	8704	10032	0.93672	1.07964	-0.0943106	0.110548	-0.563	7.46512116672594e-27	Ribosomal		structural constituent of ribosome	translation	intracellular, ribosome
Tb927.8.6330	hypothetical protein, conserved	28.9	23.3	26.0979	4.70586	935	1047	1367	1144	1181	1226	1.03234	1.07168	0.0459219	0.0998719	0.885	0.00193677	hypothetical		null	null	null
Tb927.9.11580	Gim5A protein,glycosomal membrane protein	24.8	26.7	25.7619	4.68717	3419	2698	1517	2174	2319	1871	1.0667	0.860626	0.0931509	-0.216542	0.003	8.90111441681052e-07	glycosome, glycolysis		null	null	acidocalcisome, glycosome membrane
Tb927.8.3020	hypothetical protein, conserved	16.2	33.9	25.0359	4.64593	1248	1198	1589	1097	990	1040	0.902461	0.94804	-0.148063	-0.07698	0.38	0.581825	hypothetical		null	null	null
Tb927.9.9630	hypothetical protein, conserved	15.4	34.5	24.9448	4.64067	1176	1354	1134	960	1044	915	1.0875	0.953125	0.121015	-0.0692627	0.435	0.544277	hypothetical	SG	null	null	null
Tb927.7.1500	nucleotide binding protein, putative	20.3	28.7	24.4987	4.61464	328	275	302	463	384	323	0.829374	0.697624	-0.269906	-0.519478	-0.037	5.36511328380159e-05	nucleotide metabolism		nucleotide binding	null	cytosol
Tb927.7.1730	60S ribosomal protein L7, putative	23.8	25	24.4015	4.6089	1904	1896	1522	1884	1474	2172	0.782378	1.15287	-0.354062	0.205225	-1.05	2.25085857014201e-45	Ribosomal		structural constituent of ribosome	ribosome biogenesis, translation	acidocalcisome, intracellular, large ribosomal subunit, ribosome
Tb927.7.320	hypothetical protein, conserved	20.1	28.4	24.205	4.59723	607	543	638	637	345	301	0.541601	0.472527	-0.884697	-1.08153	0.218	0.0180731	RNA metabolism	SG	RNA binding	RNA processing	acidocalcisome
Tb927.11.6600	hypothetical protein, conserved	26.4	21.3	23.821	4.57416	138	175	169	147	155	249	1.05442	1.69388	0.0764521	0.76033	-0.083	0.223412	hypothetical	SG	null	modulation of development of symbiont involved in interaction with host, quorum sensing involved in interaction with host	null
Tb927.10.5250	hypothetical protein, conserved,zinc finger protein family member, putative	27.7	19.8	23.7433	4.56945	291	1175	2148	220	581	983	2.64091	4.46818	1.40103	2.15969	1.282	0.272022	RNA metabolism		RNA binding, zinc ion binding	null	null
Tb927.10.10610	protein tyrosine phosphatase, putative	25.3	21.5	23.3813	4.54729	1136	692	744	1128	1143	999	1.0133	0.885638	0.0190583	-0.17521	0.037	3.01424511592135e-05	others		protein tyrosine phosphatase activity	null	membrane, mitochondrial inner membrane
Tb927.8.3560	DNA repair and recombination helicase protein PIF1, putative,DNA repair and recombination protein, mitochondrial precursor, putative	21.4	25.2	23.275	4.54071	1313	865	923	1364	1066	875	0.781525	0.641496	-0.355636	-0.640489	0.557	0.862977	dna-binding		5'-3' DNA helicase activity, nucleoside-triphosphatase activity, nucleotide binding	DNA replication, Okazaki fragment processing, DNA replication, removal of RNA primer	mitochondrion
Tb927.9.4500	HSP70-like protein	38.8	4.6	21.6923	4.43911	1265	1739	3799	1597	3773	8110	2.36255	5.07827	1.24035	2.34434	2.618	1.71799859060826e-88	others		ATP binding	protein folding	acidocalcisome, mitochondrial inner membrane
Tb927.8.980	phosphoacetylglucosamine mutase, putative,acetylglucosaminephosphomutase, putative,N-acetylglucosamine-phosphate mutase, putative	5.2	37.1	21.175	4.40429	2645	4840	4475	2889	2902	3478	1.0045	1.20388	0.00647732	0.267688	0.104	5.48885961659332e-05	others		phosphoacetylglucosamine mutase activity	carbohydrate metabolic process, glucosamine metabolic process	null
Tb927.10.13730	60S ribosomal protein L7, putative	17.2	24	20.6097	4.36525	1149	789	639	977	914	587	0.935517	0.600819	-0.0961644	-0.734998	-0.513	4.13430627370844e-18	Ribosomal		structural constituent of ribosome	translation	ribosome
Tb927.1.2570	coatomer beta subunit	16.7	24.3	20.5136	4.35851	1866	2314	2286	2309	2373	2887	1.02772	1.25032	0.0394439	0.322303	0.887	0.000760818	vacuolar traficking	SG	structural molecule activity	intracellular protein transport, vesicle-mediated transport	membrane coat
Tb927.11.5290	mitochondrial carrier protein, putative	16.6	24.4	20.4729	4.35565	527	531	620	572	564	609	0.986014	1.06469	-0.02032	0.0904271	0.276	0.0546875	transport	SG	null	transport	acidocalcisome, integral to membrane, membrane, mitochondrial inner membrane, mitochondrion
Tb927.10.6880	glyceraldehyde 3-phosphate dehydrogenase, cytosolic	4.4	34.1	19.2424	4.26622	2146	2608	1864	1857	2718	3091	1.46365	1.66451	0.549572	0.7351	0.169	0.0013437	glycosome, glycolysis		glyceraldehyde-3-phosphate dehydrogenase (NAD+) (phosphorylating) activity	glycolysis	cytosol
Tb927.10.13310	DNA-directed RNA polymerase II, putative,RNA polymerase subunit, putative	4.9	31.3	18.0796	4.17629	395	392	301	374	371	249	0.991979	0.665775	-0.0116191	-0.586893	-0.607	1.3042560316633e-15	dna-binding		DNA binding, DNA-directed RNA polymerase activity	transcription, DNA-dependent	nucleus
Tb927.4.2380	sarcoplasmic reticulum glycoprotein, putative	14.3	21.4	17.8396	4.15702	155	458	827	193	325	596	1.68394	3.08808	0.751839	1.62671	2.069	6.82636390574961e-36	others		GTP binding, calcium ion binding	calcium ion transport	intracellular, sarcoplasmic reticulum
Tb927.8.1960	hypothetical protein, conserved	16.5	18.6	17.5558	4.13387	1045	958	953	718	704	614	0.980501	0.855153	-0.0284084	-0.225745	0.296	0.0729153	hypothetical	SG	null	null	cytoplasm, nucleus
Tb927.7.2820	histone H2A, putative	16.9	17.4	17.1215	4.09774	0	0	0	0	0	0	#DIV/0!	#DIV/0!	#DIV/0!	#DIV/0!		3.94591427194754e-32	histone		DNA binding	chromosome organization, nucleosome assembly	nucleosome, nucleus
Tb927.2.4210	glycosomal phosphoenolpyruvate carboxykinase	10.5	23.1	16.8204	4.07214	7842	2579	1526	9979	7158	4913	0.717306	0.492334	-0.479339	-1.02229	-3.145	7.545475343181e-251	glycosome, glycolysis		ATP binding, microtubule binding, phosphoenolpyruvate carboxykinase (ATP) activity	gluconeogenesis	acidocalcisome, glycosome, vesicle membrane
Tb927.10.1170	intraflagellar transport protein IFT172, putative	12.2	21.3	16.7655	4.06743	2543	3396	3589	2711	2715	3667	1.00148	1.35264	0.00212708	0.435775	1.002	5.33933846196957e-05	transport	SG	null	intraflagellar transport involved in cilium morphogenesis	acidocalcisome, cilium basal body, motile cilium
Tb927.11.10790	40S ribosomal protein SA, putative	8.7	23.7	16.2375	4.02125	13805	11327	6674	15664	18136	9591	1.15781	0.612296	0.211404	-0.7077	-0.33	0.00275973	Ribosomal		protein complex binding, structural constituent of ribosome	translation	intracellular, organellar small ribosomal subunit, ribosome
Tb927.11.5810	hypothetical protein, conserved	15.8	16.1	15.9419	3.99475	224	197	173	207	166	128	0.801932	0.618357	-0.318448	-0.693487	0.298	0.194474	hypothetical		null	null	null
Tb927.10.5760	adenylate kinase, putative	14.6	17.1	15.8612	3.98743	1703	852	964	1564	1502	1089	0.960358	0.696292	-0.0583557	-0.522237	-1.132	3.6290764959437e-53	nucleotide metabolism	SG	ATP binding, adenylate kinase activity	nucleobase-containing compound metabolic process, nucleobase-containing small molecule interconversion	acidocalcisome
Tb927.11.8770	ATP-dependent DEAD/H RNA helicase, putative,DEAD box RNA helicase, putative,RNA helicase, putative	7.2	23.6	15.4091	3.94571	1024	856	969	892	854	702	0.957399	0.786996	-0.0628076	-0.345573	0.387	0.30234	RNA metabolism		ATP binding, ATP-dependent helicase activity, helicase activity, nucleic acid binding	maturation of SSU-rRNA from tricistronic rRNA transcript (SSU-rRNA, 5.8S rRNA, LSU-rRNA)	nucleolus
Tb927.3.2830	hypothetical protein, conserved	4.6	25.7	15.1409	3.92038	701	498	444	546	463	333	0.847985	0.60989	-0.237889	-0.713379	-0.089	2.86270188484402e-06	hypothetical		null	null	null
Tb927.4.110	is_pseudo=true retrotransposon hot spot protein (RHS, pseudogene), putative,retrotransposon hot spot protein 1 (RHS1), interrupted	11.8	18.3	15.0307	3.90984	342	199	255	183	210	195	1.14754	1.06557	0.198546	0.0916305	2.501	1.26576691686914e-38	retrotransposon hot spot protein		null	null	null
Tb927.8.7780	hypothetical protein, conserved	16.1	13.7	14.8957	3.89682	98	744	1118	108	322	1031	2.98148	9.5463	1.57603	3.25494	2.539	5.76987359833626e-18	hypothetical		null	null	null
Tb927.10.2980	proteasome regulatory non-ATPase subunit 11,19S proteasome regulatory subunit, Metallo-peptidase, Clan MP, Family M67	11.4	18.3	14.8852	3.89581	123	125	106	619	550	559	0.88853	0.903069	-0.170508	-0.147091	1.266	8.04156334229644e-06	proteasome		null	cell growth, ubiquitin-dependent protein catabolic process	proteasome regulatory particle
Tb927.11.7590	hypothetical protein, conserved	13.7	15.9	14.7863	3.88619	785	741	820	873	828	822	0.948454	0.941581	-0.0763509	-0.0868433	1.028	1.50896267321743e-05	hypothetical	SG	null	null	mitochondrion
Tb927.2.340	retrotransposon hot spot (RHS) protein, putative,retrotransposon hot spot protein 4 (RHS4), putative	10	19.5	14.7244	3.88013	6254	4783	5172	5710	6328	5337	1.10823	0.934676	0.148259	-0.0974617	3.411	6.99412945995975e-159	retrotransposon hot spot protein		null	null	nucleus
Tb927.5.3030	intraflagellar transport protein IFT122, putative	11	18	14.4549	3.85349	1478	2000	2120	1627	1507	1664	0.926245	1.02274	-0.110535	0.0324412	0.756	0.0455592	transport		null	intraflagellar retrograde transport, intraflagellar transport involved in cilium morphogenesis	null
Tb927.3.3060	hypothetical protein, conserved	18.1	10.4	14.2569	3.83359	664	925	1521	472	590	788	1.25	1.66949	0.321928	0.739409	1.381	2.66253179352236e-05	hypothetical	SG	null	null	null
Tb927.4.2240	hypothetical protein, conserved	13.9	14.1	14.002	3.80756	581	702	742	1340	572	566	0.426866	0.422388	-1.22815	-1.24336	0.199	0.00636717	hypothetical	SG	catalytic activity	metabolic process	null
Tb927.4.410	CAF 40	14.1	13.9	13.9692	3.80418	1063	1216	1275	1443	1566	1533	1.08524	1.06237	0.118013	0.0872864	0.611	0.588475	RNA metabolism	SG	null	null	acidocalcisome
Tb927.11.4700	prostaglandin f synthase	12.8	14.9	13.8721	3.79411	8884	4058	2592	9026	8134	3633	0.901174	0.402504	-0.150122	-1.31293	-2.518	9.13646611548174e-176	others	SG	D-arabinose 1-dehydrogenase [NAD(P)+] activity, aldo-keto reductase (NADP) activity	D-arabinose catabolic process, oxidation-reduction process	null
Tb927.10.2810	hypothetical protein, conserved	11.1	16.2	13.6143	3.76706	1180	1034	943	830	801	777	0.96506	0.936145	-0.0513091	-0.0951967	0.116	0.000269691	hypothetical		null	null	null
Tb927.10.6060	universal minicircle sequence binding protein (UMSBP), putative,DNA-binding protein HEXBP, putative,zinc finger protein	15.2	11.7	13.4341	3.74783	5522	1928	1131	6272	6385	2185	1.01802	0.348374	0.0257611	-1.52129	-0.796	4.9789665276616e-38	dna-binding	SG	nucleic acid binding, zinc ion binding	mitochondrial DNA inheritance, mitosis	null
Tb05.5K5.70	nucleolar RNA helicase II, putative,nucleolar RNA helicase Gu, putative,BAC from homologous region on chr5	9.7	16.4	13.0803	3.70933	3008	1379	987	2410	2109	1328	0.875104	0.551037	-0.192474	-0.859778	-1.225	2.91060164894286e-62	RNA metabolism		ATP binding, ATP-dependent helicase activity, RNA binding, helicase activity	null	nucleus
Tb927.10.1490	hypothetical protein, conserved	10.1	15.3	12.74	3.67129	3827	3108	3397	3675	3355	3721	0.912925	1.01252	-0.131431	0.0179461	0.374	0.403062	hypothetical	SG	null	null	null
Tb927.11.9530	14-3-3-like protein, putative	8.3	16.9	12.6241	3.6581	4654	6421	4824	6021	6927	6729	1.15047	1.11759	0.202228	0.160389	0.697	0.122445	dna-binding		DNA binding, protein domain specific binding	Ras protein signal transduction, endocytosis	acidocalcisome, eukaryotic translation initiation factor 4F complex
Tb927.9.6290	arginine kinase	11.6	13	12.2911	3.61954	2596	7213	5367	2682	2565	5307	0.956376	1.97875	-0.0643504	0.984587	-0.917	1.08839304513278e-46	atp-binding		ATP binding, arginine kinase activity, transferase activity, transferring phosphorus-containing groups	biological_process	cytosol
Tb927.5.800	casein kinase I, isoform 2	9.5	14.9	12.219	3.61106	2686	4092	4569	1999	2262	2581	1.13157	1.29115	0.17832	0.368652	0.56	0.899299	others		ATP binding, protein serine/threonine kinase activity, protein tyrosine kinase activity	protein phosphorylation	acidocalcisome
Tb927.6.4390	kinesin, putative	12.1	12.1	12.0907	3.59582	867	2136	3209	936	1286	2177	1.37393	2.32585	0.45831	1.21776	1.611	8.01086984623219e-21	structural		ATP binding, microtubule motor activity, motor activity	microtubule-based movement	microtubule associated complex
Tb927.8.7530	3,2-trans-enoyl-CoA isomerase, mitochondrial precursor, putative	10	14.1	12.0265	3.58815	1866	773	781	1722	1083	671	0.62892	0.389663	-0.669052	-1.3597	-0.897	7.81252695087844e-36	others	SG	catalytic activity	metabolic process	acidocalcisome, mitochondrion
Tb927.10.14550	ATP-dependent DEAD/H RNA helicase, putative	12.2	11.4	11.7809	3.55838	1135	885	657	1008	856	709	0.849206	0.703373	-0.235813	-0.507638	-0.412	0.0121346	RNA metabolism	SG	ATP binding, ATP-dependent helicase activity, helicase activity, nucleic acid binding	nucleobase-containing compound metabolic process	acidocalcisome
Tb927.11.14130	ribosomal protein L18, putative	10.6	12.5	11.5218	3.52629	8142	8743	6759	8431	8950	8065	1.06156	0.956589	0.0861839	-0.0640292	-0.249	4.94783438997112e-14	Ribosomal		structural constituent of ribosome	translation	acidocalcisome, intracellular, ribosome
Tb927.8.5650	hypothetical protein, conserved	10.1	12.3	11.1689	3.48141	1113	1085	1017	1163	1130	1028	0.971625	0.883921	-0.0415283	-0.178011	0.818	0.0142871	hypothetical		null	null	null
Tb927.9.6070	40S ribosomal protein S3, putative	11	11.2	11.0805	3.46996	6709	5994	4528	9079	8650	8911	0.952748	0.981496	-0.0698333	-0.0269461	-0.537	6.5181151584279e-16	Ribosomal		RNA binding, nucleic acid binding, structural constituent of ribosome	ribosome biogenesis, translation	intracellular, ribosome, small ribosomal subunit
Tb927.10.14470	intraflagellar transport protein IFT140, putative	8.4	13.8	11.0582	3.46704	1979	2691	3065	1757	1680	2190	0.956175	1.24644	-0.064653	0.317817	0.897	0.00585138	structural		null	intraflagellar retrograde transport, intraflagellar transport involved in cilium morphogenesis	null
Tb927.11.1420	hypothetical protein, conserved	4.6	17.4	10.9801	3.45682	522	571	630	498	743	907	1.49197	1.82129	0.577216	0.864957	1.157	2.8896095208276e-05	hypothetical		null	null	null
Tb927.3.3270	ATP-dependent phosphofructokinase	6.8	14.5	10.6318	3.41031	7455	18045	19582	8154	10187	16785	1.24933	2.0585	0.321149	1.04159	3.028	2.63252710939935e-131	glycosome, glycolysis		6-phosphofructokinase activity, ATP binding	glycolysis	6-phosphofructokinase complex, acidocalcisome, glycosome
Tb927.10.2560	mitochondrial malate dehydrogenase	8.1	13	10.5684	3.40169	3689	707	519	2982	1375	890	0.4611	0.298457	-1.11685	-1.7444	-2.355	1.59833406897489e-153	glycosome, glycolysis		L-malate dehydrogenase activity, malate dehydrogenase activity, oxidoreductase activity	glycolysis, malate metabolic process, oxidation-reduction process, tricarboxylic acid cycle	acidocalcisome, mitochondrial inner membrane, mitochondrion
Tb927.11.8880	hypothetical protein, conserved	7.5	13.4	10.4393	3.38395	166	168	180	315	300	241	0.952381	0.765079	-0.0703893	-0.386319	0.313	0.250417	hypothetical	SG	null	null	null
